# Supplementary material for: Brønsted acid assisted activation of imide carbonyl group: regioselective synthesis of isoindoloisoquinolinone alkaloid (±)-nuevamine
Source: Royal Society of Chemistry journal article supplement (doi:10.1039/c1ob06349a), 2011-01-01
Supplement: c1ob06349a.pdf [file c1ob06349a.pdf]

## Electronic Supplementary Information

# **Brønsted acid assisted activation of imide carbonyl group: Regioselective synthesis of isoindoloisoquinolinone alkaloid (±)- nuevamine**

Jayaraman Selvakumar and Chinnasamy Ramaraj Ramanathan\*

Department of Chemistry, Pondicherry University, Puducherry – 605 014, India.

*E-mail: crrnath.che@pondiuni.edu.in*

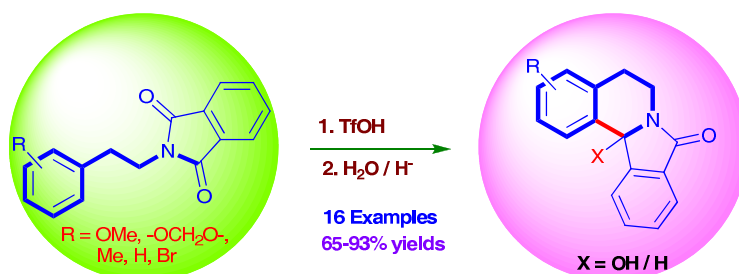

**General information:** Melting points reported in this paper are uncorrected and were determined using EZ Melt, Stanford Research Systems, USA. Infrared spectra were recorded on Thermo Nicolet 6700 FT-IR Spectrophotometer and are reported in frequency of absorption ( $\text{cm}^{-1}$ ). Mass spectra were measured with micro mass Q-TOF (ESI-HRMS), MALDI-MS were recorded on ABI Voyager DE-STR,  $^1\text{H}$  and  $^{13}\text{C}$  NMR were recorded on Bruker AVANCE 400 spectrometer. NMR spectra for all the samples were measured in  $\text{CDCl}_3$  or  $\text{DMSO}-d_6$  using TMS as an internal standard. The chemical shifts are expressed in  $\delta$  ppm down field from the signal of internal TMS. Triflic acid was purchased from Aldrich and used without further purification. Phenethylamines were prepared following the reported methods.<sup>1</sup> Solvents used for the reactions were dried using standard procedures.<sup>2</sup> Column chromatography was performed on Merck silica gel 100-200 mesh and TLC analysis was facilitated using phosphomolybdic acid stain in addition to UV light with Merck 60 F<sub>254</sub> pre-coated silica plates.

### Preparation of substituted phenethyl *N*-phthalimides:<sup>3</sup>

A suspension of phthalic anhydride (12 mmol) in toluene in an oven dried round bottom flask fitted with Dean-Stark apparatus was heated to reflux until complete dissolution of the anhydride and no additional water was removed. To this solution was added appropriate phenethylamines (10 mmol) and refluxing was continued until the water evolution was completed (2-3 h). Reaction mixture was concentrated under reduced pressure to give a residue which was purified through column chromatography to give **1a-k** and **1m** in pure form.

#### *N*-[2-(3,4-Dimethoxyphenyl)ethyl]phthalimide (**1a**)<sup>4</sup>

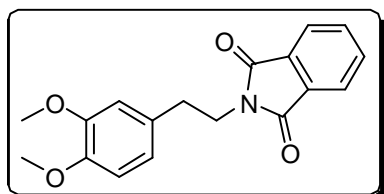

2.713g. white solid, 87% yield; m.p. 171 °C (*Lit.*<sup>4</sup> 168-170 °C); IR (KBr,  $\text{cm}^{-1}$ ): 2941, 1759, 1713, 1596;  $^1\text{H}$  NMR (400 MHz,  $\text{CDCl}_3$ ):  $\delta$  7.8-7.81 (m, 2H) 7.71-7.69 (m, 2H), 6.78-6.78 (m, 2H), 6.74 (d,  $J = 1.2$  Hz, 1H), 3.93-3.89 (m, 2H), 3.84 (s, 3H), 3.81 (s, 3H), 2.96-2.92 (m, 2H);  $^{13}\text{C}$  NMR (100 MHz,  $\text{CDCl}_3$ ):  $\delta$  168.1, 148.8, 147.7, 133.9, 132.0, 130.4, 123.1, 120.8, 111.9, 111.2, 55.8, 55.7, 39.3, 34.0.

***N*-[2-(3,5-Dimethoxyphenyl)ethyl]phthalimide (1b)**

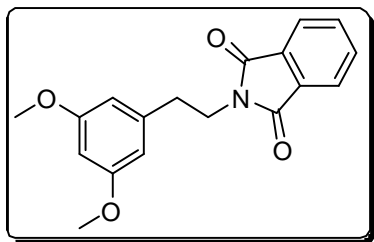

2.182 g. white solid, 70% yield; m.p. 140-142 °C; IR (KBr,  $\text{cm}^{-1}$ ): 2940, 1765, 1707, 1591;  $^1\text{H}$  NMR (400 MHz,  $\text{CDCl}_3$ ):  $\delta$  7.84-7.82 (m, 2H), 7.72-7.69 (m, 2H), 6.41 (d,  $J = 2.0$  Hz, 2H), 6.32 (t,  $J = 2.0$  Hz, 1H), 3.94-3.90 (m, 2H), 3.74 (s, 6H), 2.95-2.91 (m, 2H);  $^{13}\text{C}$  NMR (100 MHz,  $\text{CDCl}_3$ ):  $\delta$  168.1, 160.8, 140.2, 133.9, 132.1, 123.2, 106.7,

98.9, 55.2, 39.0, 34.8.

***N*-[2-(2,3-Dimethoxyphenyl)ethyl]phthalimide (1c)**

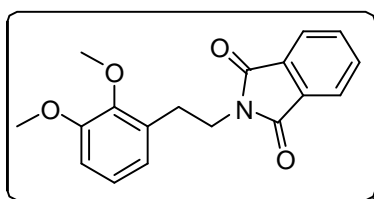

2.649 g. white solid, 85% yield; m.p. 119 °C; IR (KBr,  $\text{cm}^{-1}$ ): 2943, 1766, 1708, 1586;  $^1\text{H}$  NMR (400 MHz,  $\text{CDCl}_3$ ):  $\delta$  7.83-7.81 (m, 2H), 7.70-7.68 (m, 2H), 6.96-6.92 (m, 1H), 6.81-6.76 (m, 2H), 3.95-3.91 (m, 2H), 3.89 (s, 3H), 3.86 (s, 3H), 3.03-2.99 (m, 2H);  $^{13}\text{C}$  NMR (100

MHz,  $\text{CDCl}_3$ ):  $\delta$  168.2, 152.7, 147.6, 133.7, 132.1, 131.9, 123.8, 123.1, 122.3, 111.2, 60.7, 55.7, 38.5, 29.1.

***N*-[2-(3-Methoxyphenyl)ethyl]phthalimide (1d)**

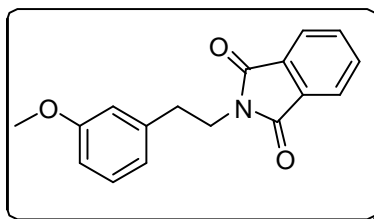

2.06 g. white solid, 73% yield; m.p. 91 °C; IR (KBr,  $\text{cm}^{-1}$ ): 2937, 1767, 1719, 1602;  $^1\text{H}$  NMR (400 MHz,  $\text{CDCl}_3$ ):  $\delta$  7.83-7.81 (m, 2H), 7.70-7.68 (m, 2H), 7.19 (t,  $J = 7.6$  Hz, 1H), 6.84 (d,  $J = 7.6$  Hz, 1H), 6.79-6.78 (m, 1H), 6.75 (dd,  $J = 8.0, 2.4$  Hz, 1H), 3.93-3.89 (m, 2H), 3.75 (s, 3H), 2.97-2.94 (m, 2H);  $^{13}\text{C}$  NMR (100 MHz,  $\text{CDCl}_3$ ):  $\delta$

168.1, 159.7, 139.5, 133.9, 132.0, 129.5, 123.2, 121.1, 114.2, 112.2, 55.1, 39.1, 34.6.

***N*-[2-(3,4,5-Trimethoxyphenyl)ethyl]phthalimide (1e)**

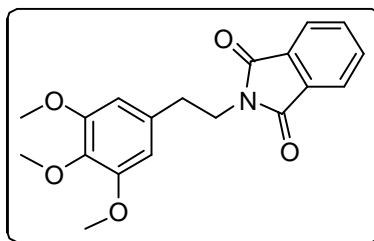

2.683 g. white solid, 78% yield; m.p. 168 °C; IR (KBr,  $\text{cm}^{-1}$ ): 2940, 1767, 1710, 1589;  $^1\text{H}$  NMR (400 MHz,  $\text{CDCl}_3$ ):  $\delta$  7.84-7.82 (m, 2H), 7.72-7.70 (m, 2H), 6.46 (s, 2H), 3.94-3.90 (m, 2H), 3.81 (s, 6H), 3.80 (s, 3H), 2.96-2.92 (m, 2H);  $^{13}\text{C}$  NMR (100 MHz,  $\text{CDCl}_3$ ):  $\delta$  168.1, 153.1, 136.5, 133.9, 133.5, 131.9, 105.5, 123.1, 60.7, 55.9, 39.0,

34.7.

***N*-[2-(2,3,4-Trimethoxyphenyl)ethyl]phthalimide (1f)<sup>5</sup>**

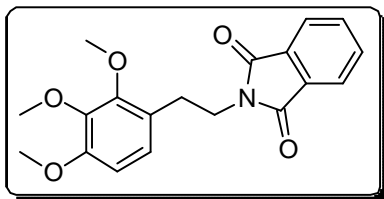

2.8 g. white solid, 82% yield; m.p. 105-107 °C (*Lit.*<sup>5</sup> 110 °C); IR (KBr, cm<sup>-1</sup>): 3011, 2942, 2832, 1765, 1712, 1603, 1497, 1397, 1280, 1110, 1000, 907, 796; <sup>1</sup>H NMR (400 MHz, CDCl<sub>3</sub>): δ 7.82-7.80 (m, 2H), 7.69-7.67 (m, 2H), 6.83 (d, *J* = 8.5 Hz, 1H), 6.55 (d, *J* = 8.5 Hz, 1H), 3.91-3.87 (m, 5H), 3.81 (s, 3H), 3.75 (s, 3H), 2.94-2.91 (m, 2H); <sup>13</sup>C NMR (100 MHz, CDCl<sub>3</sub>): δ 168.2, 152.6, 152.2, 142.1, 133.7, 132.2, 124.4, 124.0, 123.0, 107.0, 60.8, 60.5, 55.9, 38.6, 28.9.

***N*-[2-(3,4-Methylenedioxyphenyl)ethyl]phthalimide (1g)<sup>6</sup>**

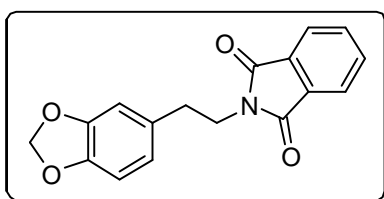

2.596 g. white solid, 88% yield; m.p. 139-141 °C (*Lit.*<sup>6</sup> 139-140 °C); IR (KBr, cm<sup>-1</sup>): 2938, 2888, 1767, 1706, 1611, 1496, 1399, 1099, 929, 715; <sup>1</sup>H NMR (400 MHz, CDCl<sub>3</sub>): δ 6.75 (d, *J* = 1.2 Hz, 1H), 6.70 (d, *J* = 8.0 Hz, 1H), 6.67 (dd, *J* = 8.0, 1.2 Hz, 1H), 5.91 (s, 2H), 3.89-3.85 (m, 2H), 2.92-2.88 (m, 2H); <sup>13</sup>C NMR (100 MHz, CDCl<sub>3</sub>): δ 168.1, 147.7, 146.2, 133.9, 132.0, 131.7, 123.2, 121.7, 109.2, 108.3, 100.8, 39.4, 34.3.

***N*-[2-(2,5-Dimethoxyphenyl)ethyl]phthalimide (1h)**

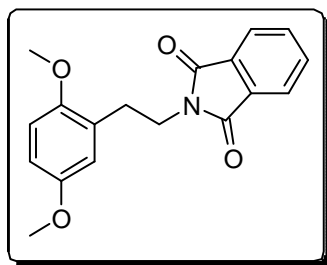

2.457 g. white solid, 79% yield; m.p. 95 °C; IR (KBr, cm<sup>-1</sup>): 2938, 1705, 1575, 1501, 1382, 1256; <sup>1</sup>H NMR (400 MHz, CDCl<sub>3</sub>): δ 7.82-7.77 (m, 2H), 7.70-7.66 (m, 2H), 6.73-6.68 (m, 3H), 3.93 (t, *J* = 7.2 Hz, 2H), 3.70 (s, 3H), 3.66 (s, 3H), 2.97 (t, *J* = 7.2 Hz, 2H); <sup>13</sup>C NMR (100 MHz, CDCl<sub>3</sub>): δ 168.2, 153.3, 152.0, 133.7, 132.1, 127.6, 123.0, 116.6, 112.2, 111.1, 55.7, 55.6, 37.8, 29.7.

***N*-[2-(3-Methylphenyl)ethyl]phthalimide (1i)**

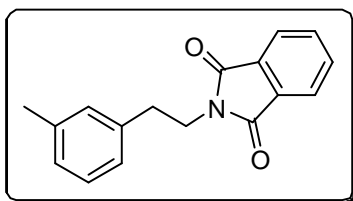

2.2 g. white solid, 83% yield; m.p. 88 °C; IR (KBr, cm<sup>-1</sup>): 3009, 2934, 2862, 1773, 1731, 1610, 1457, 1434, 1391, 1351, 1184, 1081, 1001, 865, 782, 717, 529, 495, 439; <sup>1</sup>H NMR (400 MHz, CDCl<sub>3</sub>): δ 7.84-7.82 (m, 2H), 7.71-7.69 (m, 2H), 7.17 (t, *J* = 7.6, 1H), 7.07-7.02 (m, 3H), 3.92-3.88 (m, 2H), 2.96-2.92 (m, 2H), 2.30 (s, 3H); <sup>13</sup>C NMR (100 MHz, CDCl<sub>3</sub>): δ 168.1, 138.1, 137.9, 133.8, 132.1, 129.6, 128.4, 127.3, 125.8, 123.1, 39.3, 34.5, 21.3.

### ***N*-[2-Phenyl ethyl]phthalimide (**1j**)<sup>7</sup>**

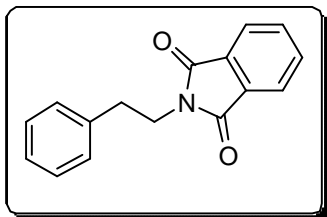

2.08 g. white solid, 83% yield; m.p. 125 °C (*Lit.*<sup>7</sup> 125 °C); IR (KBr, cm<sup>-1</sup>): 2932, 1763, 1711, 1602, 1400; <sup>1</sup>H NMR (400 MHz, CDCl<sub>3</sub>): δ 2.97-3.01 (m, 2H), 3.90-3.94 (m, 2H), 7.19-7.30 (m, 5H), 7.69-7.29 (m, 2H), 7.81 (m, 2H); <sup>13</sup>C NMR (100 MHz, CDCl<sub>3</sub>): δ 34.6, 39.2, 123.2, 126.6, 128.5, 128.8, 132.0, 133.9, 138.0, 168.1.

### ***N*-[2-(3-Bromophenyl)ethyl]phthalimide (**1k**)**

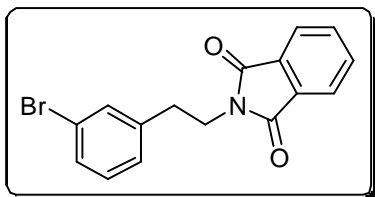

2.64 g, white solid, 80% yield; m.p. 97 °C; IR (KBr, cm<sup>-1</sup>): 3054, 2947, 1768, 1708, 1566, 1427, 1395, 1359, 1075, 717; <sup>1</sup>H NMR (400 MHz, CDCl<sub>3</sub>): δ 7.83-7.80 (m, 2H), 7.72-7.69 (m, 2H), 7.30-7.19 (m, 4H), 3.94-3.90 (m, 2H), 3.01-2.97 (m, 2H); <sup>13</sup>C NMR (100 MHz, CDCl<sub>3</sub>): δ 168.1, 138.0, 133.9, 132.0, 128.8, 128.5, 126.6, 123.2, 39.2, 34.6.

### **2-(3,4-dimethoxyphenethyl)-4,5-dimethoxyisoindoline-1,3-dione (**1m**)**

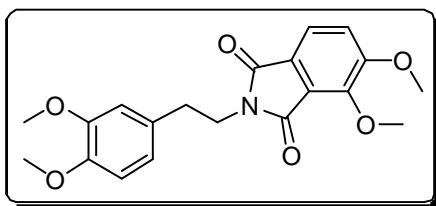

3.31 g. white solid, 87% yield; m.p. 120 °C; IR (KBr, cm<sup>-1</sup>): 3007, 2937, 2843, 1765, 1712, 1591, 1517, 1497, 1435, 1390, 1278, 1262, 1240, 1026.; <sup>1</sup>H NMR (400 MHz, CDCl<sub>3</sub>): δ 7.51 (d, *J* = 8.0 Hz, 1H), 7.08 (d, *J* = 8.0 Hz, 1H), 6.784-6.781 (m, 2H), 6.75 (s, 1H), 4.11 (s, 3H), 3.94 (s, 3H), 3.87-3.84 (m, 2H), 3.83 (s, 3H), 3.82 (s, 3H), 2.93-2.89 (m, 2H); <sup>13</sup>C NMR (100 MHz, CDCl<sub>3</sub>): δ 167.5, 166.1, 157.6, 148.8, 147.6, 147.1, 130.6, 124.6, 121.8, 120.8, 119.2, 115.7, 112.0, 111.2, 62.5, 56.6, 55.86, 55.80, 39.3, 34.0.

### ***N*-[2-(3,4-Dihydroxyphenyl)ethyl]phthalimide (**1l**)<sup>8</sup>**

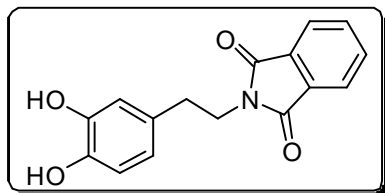

An oven dried two neck round bottom flask bearing septum in side arm was cooled to room temperature under a steady stream of nitrogen gas flow. The flask was charged with stirring bar, substrate **1f** (1 mmol) and dry dichloromethane (15 ml) and cooled down to -15 °C (using ice and salt as a freezing mixture). To this solution was added BBr<sub>3</sub> (3 ml, 1M soln. in dichloromethane) with stirring. After 2 h, the reaction mixture was quenched with water (10 ml). The organic layer was separated and aqueous layer was extracted with

dichloromethane (2 x 15 ml). The combined organic extract was washed with brine solution and dried over anhydrous Na<sub>2</sub>SO<sub>4</sub>. Filtered and the solvent was removed under vacuum on rotary evaporator to dryness. The dried compound was purified through silica gel column chromatography using ethyl acetate and hexane (50:50) as eluent; 252 mg. white solid, 89% yield; m.p. 175 °C; IR (KBr, cm<sup>-1</sup>): 3272, 2959, 1763, 1681, 1600, 1393, 1262; <sup>1</sup>H NMR (400 MHz, DMSO-*d*<sub>6</sub>): δ 8.82 (s, 1H), 8.71 (s, 1H), 7.90-7.85 (m, 4H), 6.64-6.62 (m, 2H), 6.45 (dd, *J* = 2.0, 8.0 Hz, 1H), 3.76 (t, *J* = 3.8 Hz, 2H), 2.77 (t, *J* = 3.6 Hz, 2H); <sup>13</sup>C NMR (100 MHz, DMSO-*d*<sub>6</sub>): δ 167.6, 145.0, 143.6, 134.3, 131.4, 128.8, 122.9, 119.1, 115.8, 115.4, 39.1, 33.0.

### Typical procedure for TfOH mediated cyclization.

An oven dried two neck round bottom flask bearing septum in side arm was cooled to room temperature under a steady stream of nitrogen gas flow. The flask was charged with stirring bar, imide (0.5 mmol) and dry dichloromethane (15 ml) and cooled down to 0 °C (using ice). To this solution was added TfOH (0.2 ml, 4 equiv) with stirring. After 30 minutes, the reaction mixture was quenched with water (10 ml) followed by NaHCO<sub>3</sub> (1g). The organic layer was separated and aqueous layer was extracted with dichloromethane (2 x 15 ml). The combined organic extract was washed with brine solution and dried over anhydrous Na<sub>2</sub>SO<sub>4</sub>. Filtered and the solvent was removed under vacuum on rotary evaporator to dryness. The dried compound was purified through the short silica gel column chromatography using ethyl acetate and hexane as eluent.

The isolation of compound **2d** was achieved using ethyl acetate as extracting solvent instead of dichloromethane.

### 12b-Hydroxy-2,3-dimethoxy-5,12b-dihydro-6*H*-isoindolo[1,2-*a*]isoquinolin-8-one (**2a**)<sup>4</sup>

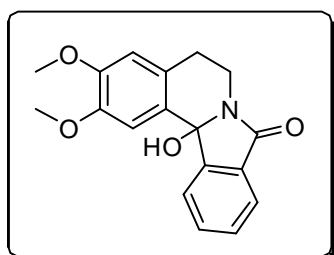

149 mg. white solid, 96% yield; m.p. 169 °C (*Lit.*<sup>4</sup> 157-159 °C); IR (KBr, cm<sup>-1</sup>): 3331, 1672, 1614, 1518; <sup>1</sup>H NMR (400 MHz, CDCl<sub>3</sub>): δ 7.99 (d, *J* = 7.6 Hz, 1H), 7.67 (d, *J* = 7.6 Hz, 1H), 7.63 (td, *J* = 7.6, 1.2 Hz, 1H), 7.47 (td, *J* = 7.6, 1.2 Hz, 1H), 7.41 (s, 1H), 6.56 (s, 1H), 4.16 (ddd, *J* = 13.2, 7.6, 1.6 Hz, 1H), 4.04 (s, 1H), 3.95 (s, 3H), 3.83 (s, 3H), 3.42-3.35 (m, 1H), 2.95-2.87 (m, 1H), 2.67 (ddd, *J* = 16.0, 8.0, 1.6 Hz, 1H), <sup>13</sup>C NMR (100 MHz, CDCl<sub>3</sub>): δ 167.4, 149.4, 148.2, 148.0, 132.7, 130.6, 129.5, 127.8, 127.6, 123.7, 123.0, 111.5, 110.4, 86.4, 56.2, 56.0, 34.9, 29.1.

### 12b-Hydroxy-1,3-dimethoxy-5,12b-dihydro-6H-isoindolo[1,2-a]isoquinolin-8-one (2b)

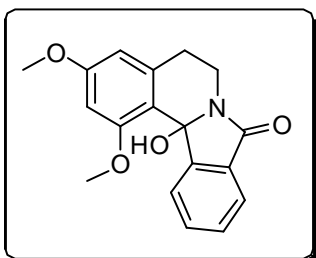

140 mg. white solid, 90% yield; m.p. 168 °C; IR (KBr,  $\text{cm}^{-1}$ ): 3307, 1675, 1594, 1443;  $^1\text{H}$  NMR (400 MHz,  $\text{CDCl}_3$ ):  $\delta$  8.14 (d,  $J = 7.6$  Hz, 1H), 7.73 (d,  $J = 7.6$  Hz, 1H), 7.51 (td,  $J = 7.6, 1.2$  Hz, 1H), 7.42 (td,  $J = 7.6, 1.2$  Hz, 1H), 6.43 (d,  $J = 2.4$  Hz, 1H), 6.27 (d,  $J = 2.0$  Hz, 1H), 4.39 (ddd,  $J = 12.8, 5.6, 3.2$  Hz, 1H), 4.31 (s, 1H), 4.04 (s, 3H), 3.76 (s, 3H), 3.33 (td,  $J = 12.8, 3.2$  Hz, 1H), 3.00-2.91 (m, 1H), 2.62 (dd,  $J = 16.4, 2.4$  Hz, 1H);  $^{13}\text{C}$  NMR (100 MHz,  $\text{CDCl}_3$ ):  $\delta$  167.7, 160.0, 158.6, 148.9, 138.5, 132.3, 130.6, 129.2, 124.1, 123.1, 117.2, 105.5, 97.8, 87.1, 55.34, 55.31, 35.1, 30.6.

### 12b-Hydroxy-3,4-dimethoxy-5,12b-dihydro-6H-isoindolo[1,2-a]isoquinolin-8-one (2c)

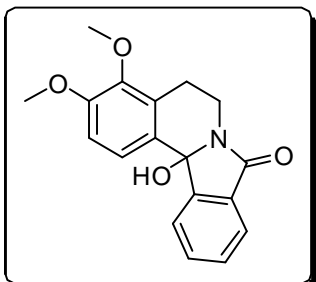

132 mg. white solid, 85% yield; m.p. 198 °C; IR (KBr,  $\text{cm}^{-1}$ ): 3293, 1678, 1602, 1458;  $^1\text{H}$  NMR (400 MHz,  $\text{CDCl}_3$ ):  $\delta$  7.99 (d,  $J = 8.0$  Hz, 1H), 7.69-7.68 (m, 1H), 7.69 (s, 1H), 7.62 (td,  $J = 7.6, 1.2$  Hz, 1H), 7.46 (td,  $J = 7.2, 0.8$  Hz, 1H), 6.87 (d,  $J = 8.8$  Hz, 1H), 4.20 (ddd,  $J = 13.2, 6.4, 2.4$  Hz, 1H), 3.83 (s, 3H), 3.81 (s, 1H), 3.73 (s, 3H), 3.41-3.34 (m, 1H), 3.02 (ddd,  $J = 16.8, 4.4, 2.0$  Hz, 1H), 2.81-2.72 (m, 1H);  $^{13}\text{C}$  NMR (100 MHz,  $\text{CDCl}_3$ ):  $\delta$  167.1, 152.4, 147.9, 146.2, 132.5, 130.5, 129.6, 129.5, 128.9, 123.5, 123.4, 123.2, 110.8, 86.1, 60.1, 55.7, 34.2, 23.4.

### 12b-Hydroxy-3-methoxy-5,12b-dihydro-6H-isoindolo[1,2-a]isoquinolin-8-one (2d)

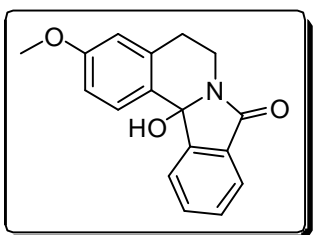

130 mg. white solid, 93% yield; m.p. 169 °C; IR (KBr,  $\text{cm}^{-1}$ ): 3265, 1681, 1613, 1580, 1407;  $^1\text{H}$  NMR (400 MHz,  $\text{DMSO}-d_6$ ):  $\delta$  8.12 (d,  $J = 8.0$  Hz, 1H), 7.89 (d,  $J = 4.8$  Hz, 1H), 7.63-7.68 (m, 2H), 7.51 (td,  $J = 7.6, 0.8$  Hz, 1H), 6.89 (s, 1H), 6.84 (dd,  $J = 8.4, 2.4$  Hz, 1H), 6.72 (d,  $J = 2.4$  Hz, 1H), 4.23-4.17 (m, 1H), 3.71 (s, 3H), 3.45-3.38 (m, 1H), 2.79 (dd,  $J = 7.6, 4.0$  Hz, 2H);  $^{13}\text{C}$  NMR (100 MHz,  $\text{DMSO}-d_6$ ):  $\delta$  165.8, 158.5, 148.7, 135.9, 132.2, 130.2, 129.6, 129.2, 129.1, 123.7, 122.3, 113.0, 112.9, 85.4, 55.0, 29.0, 34.1.

**12b-Hydroxy-1,2,3-trimethoxy-5,12b-dihydro-6H-isoindolo[1,2-a]isoquinolin-8-one (2e)**

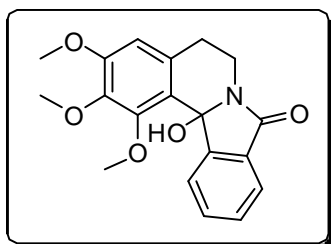

152 mg. white solid, 89% yield; m.p. 179 °C; IR (KBr,  $\text{cm}^{-1}$ ): 3282, 1675, 1600, 1456;  $^1\text{H}$  NMR (400 MHz,  $\text{CDCl}_3$ ):  $\delta$  8.49 (d,  $J = 7.6$  Hz, 1H), 7.60 (dd,  $J = 7.6, 0.8$  Hz, 1H), 7.55 (td,  $J = 7.6, 1.2$  Hz, 1H), 7.41 (td,  $J = 7.6, 0.8$  Hz, 1H), 6.38 (s, 1H), 4.30 (s, 1H), 4.13 (s, 3H), 4.05-4.01 (m, 1H), 3.85 (s, 3H), 3.80 (s, 3H), 3.25 (td,  $J = 12.8, 3.6$  Hz, 1H), 2.81-2.89 (m, 1H), 2.56 (dd,  $J = 16.0, 2.4$  Hz, 1H);  $^{13}\text{C}$  NMR (100 MHz,  $\text{CDCl}_3$ ):  $\delta$  167.5, 153.3, 153.2, 148.7, 141.3, 132.5, 131.4, 130.4, 129.2, 125.9, 122.8, 122.3, 107.7, 87.7, 61.5, 60.8, 55.8, 34.6, 30.3.

**12b-Hydroxy-2,3,4-trimethoxy-5,12b-dihydro-6H-isoindolo[1,2-a]isoquinolin-8-one (2f)**

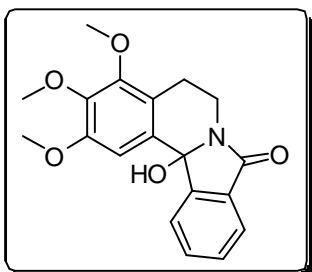

155 mg. white solid, 91% yield; m.p. 157-158 °C; IR (KBr,  $\text{cm}^{-1}$ ): 3289, 2937, 2835, 1684, 1605, 1457, 1323, 1417, 1112, 1030, 753;  $^1\text{H}$  NMR (400 MHz,  $\text{CDCl}_3$ ):  $\delta$  7.99 (d,  $J = 7.6$  Hz, 1H), 7.69 (d,  $J = 7.6$  Hz, 1H), 7.64 (td,  $J = 1.2, 7.6$  Hz, 1H), 7.48 (td,  $J = 7.6, 0.8$  Hz, 1H), 7.27 (s, 1H), 4.21 (dd,  $J = 6.2, 13.0$  Hz, 1H), 3.94 (s, 3H), 3.83 (s, 3H), 3.79 (s, 4H), 3.34 (td,  $J = 4.4, 13.0$  Hz, 1H), 2.88 (ddd,  $J = 1.7, 4.4, 16.7$  Hz, 1H), 2.68 (ddd,  $J = 6., 12.0, 16.7$  Hz, 1H);  $^{13}\text{C}$  NMR (100 MHz,  $\text{CDCl}_3$ ):  $\delta$  167.3, 152.1, 150.9, 148.0, 142.3, 132.5, 131.1, 130.4, 129.4, 123.4, 123.1, 121.8, 106.6, 86.2, 60.7, 60.5, 56.1, 34.3, 23.2; HRMS-ESI ( $m/z$ ): Calculated for  $\text{C}_{19}\text{H}_{19}\text{NO}_5$  ( $\text{M}+\text{Na}$ ): 364.1161, Found ( $\text{M}+\text{Na}$ ): 364.1168.

**11b-Hydroxy-5,11b-dihydro-6H-1,3-dioxo-6a-azaindeno[5,6-c]fluoren-7-one (2g)<sup>9</sup>**

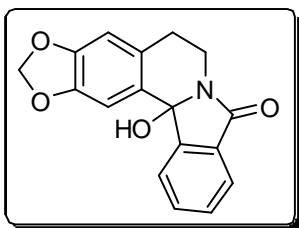

96 mg. white solid, 65% yield; m.p. 176-178 °C (*Lit.*<sup>9</sup> 175-176 °C); IR (KBr,  $\text{cm}^{-1}$ ): 3251, 2995, 2910, 2767, 1679, 1617, 1482, 1431, 1234, 1034, 701;  $^1\text{H}$  NMR (400 MHz,  $\text{CDCl}_3$ ):  $\delta$  7.96 (d,  $J = 7.5$  Hz, 1H), 7.69 (d,  $J = 7.5$  Hz, 1H), 7.63 (td,  $J = 1.1, 7.5$  Hz, 1H), 7.48 (td,  $J = 0.8, 7.5$  Hz, 1H), 7.39 (s, 1H), 6.56 (s, 1H), 5.95 (d,  $J = 1.2$  Hz, 1H), 5.90 (d,  $J = 1.2$  Hz, 1H), 4.18 (ddd,  $J = 2.1, 6.0, 13.2$  Hz, 1H), 3.63 (s, 1H), 3.39 (ddd,  $J = 4.4, 11.6, 13.2$  Hz, 1H), 2.93-2.85 (m, 1H), 2.69 (ddd,  $J = 2.1, 4.4, 16.0$  Hz, 1H);  $^{13}\text{C}$  NMR (100 MHz,  $\text{CDCl}_3$ ):  $\delta$  167.3, 147.8, 147.7, 146.6, 132.6, 130.4, 129.5, 128.8, 123.5, 123.1, 108.7, 107.3, 101.2, 86.4, 34.8, 29.4.



### 12b-Hydroxy-1,4-dimethoxy-5,12b-dihydro-6H-isoindolo[1,2-a]isoquinolin-8-one (2h)

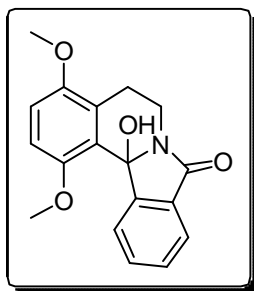

135 mg. white solid, 87% yield; m.p. 165-166 °C; IR (KBr,  $\text{cm}^{-1}$ ): 3398, 3054, 2925, 2854, 1717, 1675, 1586, 1458, , 1290, 1063, 1020, 887, 739;  $^1\text{H}$  NMR (400 MHz,  $\text{CDCl}_3$ ):  $\delta$  8.16-8.14 (m, 1H), 7.79-7.77 (m, 1H), 7.51 (td,  $J = 1.3$ , 7.5 Hz, 1H), 7.45 (td,  $J = 1.0$ , 7.5 Hz, 1H), 6.84 (d,  $J = 8.9$  Hz, 1H), 6.76 (d,  $J = 8.9$  Hz, 1H), 4.53 (ddd,  $J = 1.0$ , 5.8, 13.0 Hz, 1H), 4.45 (s, 1H), 4.07 (s, 3H), 3.75 (s, 3H), 3.30 (td,  $J = 3.5$ , 13.0 Hz, 1H), 2.91 (ddd,  $J = 1.0$ , 3.5 17.2 Hz, 1H), 2.68-2.59 (m, 1H).;  $^{13}\text{C}$  NMR (100 MHz,  $\text{CDCl}_3$ ):  $\delta$  167.8, 151.7, 151.2, 148.8, 132.4, 130.8, 129.4, 126.7, 125.6, 124.1, 123.2, 110.1, 108.9, 87.1, 55.8, 55.5, 34.7, 24.1; HRMS-ESI ( $m/z$ ): Calculated for  $\text{C}_{18}\text{H}_{17}\text{NO}_4$  (M+Na): 334.1055, Found (M+Na): 334.1053

### 12b-Hydroxy-3-methyl-5,12b-dihydro-6H-isoindolo[1,2-a]isoquinolin-8-one (2i)

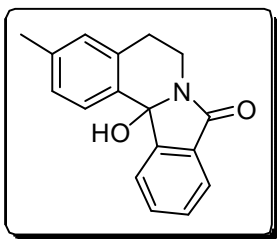

103 mg. white solid, 78% yield; m.p. 174-175 °C; IR (KBr,  $\text{cm}^{-1}$ ): 3269, 2947, 2893, 2840, 1695, 1614, 1576, 1417, 1294, 1107, 1027, 939, 824, 768, 701;  $^1\text{H}$  NMR (400 MHz,  $\text{CDCl}_3$ ):  $\delta$  8.01 (d,  $J = 8.0$  Hz, 1H), 7.81 (d,  $J = 8.0$  Hz, 1H), 7.62-7.58 (m, 2H), 7.42 (td,  $J = 0.8$ , 7.6 Hz, 1H), 7.09 (d,  $J = 12$  Hz, 1H), 6.93 (s, 1H), 4.28 (s, 1H), 4.04 (ddd,  $J = 2.4$ , 6.0, 13.1 Hz, 1H), 3.36 (ddd,  $J = 4.4$ , 11.2, 13.1 Hz, 1H), 2.94-2.85 (m, 1H), 2.74 (ddd,  $J = 2.4$ , 4.4, 12.4 Hz, 1H), 2.28 (s, 3H);  $^{13}\text{C}$  NMR (100 MHz,  $\text{CDCl}_3$ ):  $\delta$  167.3, 147.9, 138.4, 134.5, 133.0, 132.5, 130.4, 129.7, 129.3, 127.6, 127.3, 123.4, 123.3, 86.4, 34.7, 29.2, 21.0; HRMS-ESI ( $m/z$ ): Calculated for  $\text{C}_{17}\text{H}_{15}\text{NO}_2$  (M+Na): 288.1000, Found (M+Na): 288.1010.

### 12b-Hydroxy-2,3,11,12-tetramethoxy-5,12b-dihydro-6H-isoindolo[1,2-a]isoquinolin-8-one (2m)

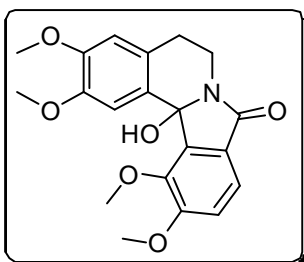

158 mg. white solid, 85% yield; m.p. 158-160 °C; IR (KBr,  $\text{cm}^{-1}$ ): 3241, 1996, 2936, 2836, 1680, 1614, 1494, 1334, 1135, 967;  $^1\text{H}$  NMR (400 MHz,  $\text{CDCl}_3$ ):  $\delta$  8.23 (s, 1H), 7.48 (d,  $J = 8.2$ , 1H), 7.03 (d,  $J = 8.2$ , 1H), 6.5 (s, 1H), 4.22 (ddd,  $J = 2.0$ , 6.1, 13.0 Hz, 1H), 4.12 (s, 3H), 3.96 (s, 3H), 3.91 (s, 3H), 3.83 (s, 3H), 3.66 (s, 1H), 3.44 (ddd,  $J = 4.5$ , 11.8, 13.0 Hz, 1H), 3.00-2.92 (m, 1H), 2.70 (ddd,  $J = 1.8$ , 4.3, 16.0 Hz, 1H);  $^{13}\text{C}$  NMR (100 MHz,  $\text{CDCl}_3$ ):  $\delta$  166.5, 157.2, 148.9, 147.7, 144.6, 140.3, 128.7, 127.0, 124.3, 119.9, 113.4, 112.0, 111.0, 87.9, 61.9, 56.4, 55.9, 55.8, 34.7, 28.7; HRMS-ESI ( $m/z$ ): Calculated for  $\text{C}_{20}\text{H}_{21}\text{NO}_6$  (M+Na): 394.1267, Found (M+Na): 394.1266.

### Cyclization of the imides **1j** and **1k**

An oven dried two neck round bottom flask bearing septum in side arm was cooled to room temperature under a steady stream of nitrogen gas flow. The flask was charged with stirring bar, substrate (0.5 mmol) and TfOH (0.4 ml, 8 equiv) with stirring and heated for 48 h at 70 °C. This mixture was quenched with water (10 ml) followed by NaHCO<sub>3</sub> (1g). The precipitate was digested in dichloromethane and organic layer was separated and aqueous layer was extracted with dichloromethane (2 x 15 ml). The combined organic extract was washed with brine solution and dried over anhydrous Na<sub>2</sub>SO<sub>4</sub>. Filtered and the solvent was removed under vacuum on rotary evaporator to dryness. The dried compound was purified through short silica gel column chromatography using ethyl acetate and hexane as eluent.

#### 12b-Hydroxy-5,12b-dihydro-6H-isoindolo[1,2-a]isoquinolin-8-one (**2j**)

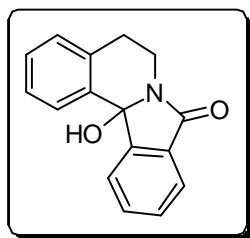

98 mg. white solid, 78% yield; m.p. 144 °C; IR (KBr, cm<sup>-1</sup>): 3284, 3065, 2929, 1679, 1606, 1419, 1295, 1-39, 945, 769, 698; <sup>1</sup>H NMR (400 MHz, CDCl<sub>3</sub>): δ 8.04 (d, *J* = 7.7 Hz, 1H), 7.95 (dd, *J* = 1.3, 7.5 Hz, 1H), 7.73 (dt, *J* = 1.3, 7.5 Hz, 1H), 7.64 (td, *J* = 1.2, 7.5 Hz, 1H), 7.49 (td, *J* = 0.9, 7.5 Hz, 1H), 7.32-7.28 (m, 1H), 7.27-7.23 (m, 1H), 7.16-7.14 (m, 1H), 4.29 (ddd, *J* = 2.4, 6.1, 13.1 Hz, 1H), 3.49 (ddd, *J* = 4.5, 11.5, 13.1 Hz, 1H), 3.40 (s, 1H), 3.06-2.97 (m, 1H), 2.85 (ddd, *J* = 2.3, 4.3, 16.2 Hz, 1H); <sup>13</sup>C NMR (100 MHz, CDCl<sub>3</sub>): δ 167.3, 147.7, 136.9, 134.9, 132.7, 132.0, 130.3, 130.0, 129.7, 129.1, 123.5, 123.2, 122.5, 86.2, 34.4, 29.0; HRMS-ESI (*m/z*): Calculated for C<sub>16</sub>H<sub>13</sub>NO<sub>2</sub> (M+Na): 274.0844, Found (M+Na): 274.0844.

#### 12b-Hydroxy-3-bromo-5,12b-dihydro-6H-isoindolo[1,2-a]isoquinolin-8-one (**2k**)

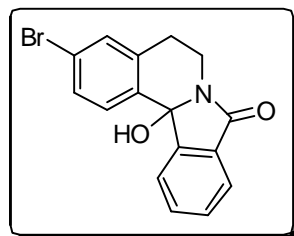

109 mg. white solid, 66% yield; m.p. 163 °C; IR (KBr, cm<sup>-1</sup>): 3246, 2951, 2894, 2838, 1683, 1593, 1472, 1414, 1181, 1114, 1040, 939, 883, 765, 697; <sup>1</sup>H NMR (400 MHz, CDCl<sub>3</sub>): δ 7.98 (d, *J* = 7.5 Hz, 1H), 7.80 (d, *J* = 8.4 Hz, 1H), 7.70-7.68 (m, 1H), 7.65 (td, *J* = 1.2, 7.5 Hz, 1H), 7.49 (td, *J* = 0.8, 7.5 Hz, 1H), 7.42 (dd, *J* = 1.8, 8.3 Hz, 1H), 7.316-7.311 (m, 1H), 4.18 (ddd, *J* = 2.4, 6.1, 13.1 Hz, 1H), 3.71 (s, 1H), 3.42 (ddd, *J* = 4.5, 11.4, 13.1 Hz, 1H), 2.99-2.91 (m, 1H), 2.80 (ddd, *J* = 2.3, 4.2, 16.4 Hz, 1H); <sup>13</sup>C NMR (100 MHz, CDCl<sub>3</sub>): δ 167.3, 147.4, 136.9, 134.9, 132.7,

132.0, 130.3, 130.0, 129.7, 129.1, 123.5, 123.2, 122.5, 86.2, 34.4, 29.0; HRMS-ESI ( $m/z$ ): Calculated for  $C_{16}H_{12}BrNO_2$  ( $M+Na$ ): 351.9949, Found ( $M+Na$ ): 351.9948.

### Typical procedure for cyclization followed by $NaBH_4$ /TFA reduction.<sup>10</sup>

An oven dried two neck round bottom flask bearing septum in side arm was cooled to room temperature under a steady stream of nitrogen gas flow. The flask was charged with stirring bar, imide (0.5 mmol) and dry dichloromethane (15 ml) and cooled down to 0 °C. To this solution was added TfOH (0.2 ml, 2 mmol) with stirring. After the stipulated time the contents were brought to room temperature and  $NaBH_4$  (2 mmol) was added followed by TFA (1 ml) and the solution was stirred until color disappears (additional  $NaBH_4$  and TFA was used if color persists for long time). To this mixture acetone was added and evaporated under reduced pressure to dryness. The solid residue was dissolved in dichloromethane (20 ml) and the insoluble material was filtered off, the organic layer was dried over anhydrous  $Na_2SO_4$  and filtered. The solvent was evaporated under vacuum and the crude product was purified through silica gel column chromatography.

The isolation of compound **3l** was achieved using ethyl acetate as extracting solvent instead of dichloromethane.

### 3-methyl-5,12b-dihydroisoindolo[1,2-a]isoquinolin-8(6H)-one (**3h**)

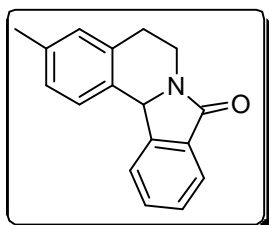

114 mg. white semi solid, 92% yield; IR (KBr,  $cm^{-1}$ ): 3018, 2929, 1696, 1614, 1468, 1394, 1298, 735.;  $^1H$  NMR (400 MHz,  $CDCl_3$ ):  $\delta$  7.88-7.84 (m, 2H), 7.60 (td,  $J = 1.2, 7.5$  Hz, 1H), 7.52-7.46 (m, 2H), 7.08 (d,  $J = 7.9$  Hz, 1H), 7.01 (s, 1H), 5.65 (s, 1H), 4.44 (ddd,  $J = 4.3, 5.7, 12.8$  Hz, 1H), 3.47 (ddd,  $J = 4.5, 9.6, 12.8$  Hz, 1H), 3.07-2.99 (m, 1H), 2.84 (dt,  $J = 4.5, 15.9$  Hz, 1H), 2.31 (s, 1H);  $^{13}C$  NMR (100 MHz,  $CDCl_3$ ):  $\delta$  167.9, 144.4, 137.1, 134.5, 132.7, 131.4, 131.3, 129.8, 128.3, 128.0, 127.4, 125.1, 123.7, 123.4, 59.0, 38.2, 29.3, 21.1, 20.9; MALDI-MS ( $m/z$ ): Calculated for  $C_{17}H_{15}NO$  ( $M+H$ ): 250.1232, Found ( $M+H$ ): 250.1281.

### 5,11b-Dihydro-6H-1,3-dioxo-6a-aza-indeno[5,6-c]-fluoren-7-one (**3f**)<sup>9</sup>

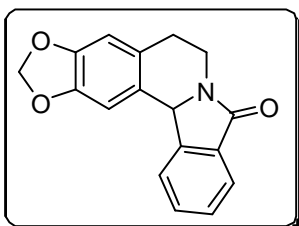

119 mg. white solid, 85% yield; m.p. 180-181 °C (*Lit.*<sup>9</sup> 179-180 °C); IR (KBr,  $cm^{-1}$ ): 3031, 2948, 2907, 1691, 1499, 1238, 1029, 899, 837, 735, 688;  $^1H$  NMR (400 MHz,  $CDCl_3$ ):  $\delta$  7.88 (d,  $J = 7.5$  Hz, 1H), 7.80 (dd,  $J = 0.7,$

7.5 Hz, 1H), 7.61 (td,  $J = 1.2, 7.5$  Hz, 1H), 7.50 (t,  $J = 7.5$  Hz, 1H), 7.08 (s, 1H), 6.65 (s, 1H), 5.96 (d,  $J = 1.2$  Hz, 1H), 5.89 (d,  $J = 1.2$  Hz, 1H), 5.57 (s, 1H), 4.37 (ddd,  $J = 4.8, 5.5, 13.0$  Hz, 1H), 3.45 (ddd,  $J = 4.7, 9.2, 13.0$  Hz, 1H), 3.02-2.94 (m, 1H), 2.78 (dt,  $J = 4.7, 15.7$  Hz, 1H);  $^{13}\text{C}$  NMR (100 MHz,  $\text{CDCl}_3$ ):  $\delta$  167.9, 146.8, 146.5, 144.2, 132.7, 131.5, 128.5, 128.2, 127.2, 123.9, 123.3, 109.1, 105.5, 101.1, 59.1, 38.2, 29.4.

### 2,3-dihydroxy-5,6-dihydroisoindolo[1,2-a]isoquinolin-8(12bH)-one (3l)

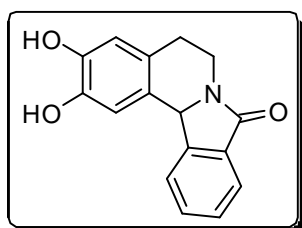

110 mg, white solid, 77% yield; m.p. 225-227 °C; IR (KBr,  $\text{cm}^{-1}$ ): 3493, 1651, 1626, 1455, 1294, 1270, 234, 731;  $^1\text{H}$  NMR (400 MHz,  $\text{DMSO}-d_6$ ):  $\delta$  8.95 (s, 1H), 8.87 (s, 1H), 7.94 (d,  $J = 7.6$  Hz, 1H), 7.71-7.66 (m, 2H), 7.52 (t,  $J = 7.6$  Hz, 1H), 7.08 (s, 1H), 6.55 (s, 1H), 5.67 (s, 1H), 4.19-4.13 (m, 1H), 3.34-3.31 (m, 1H), 2.71-2.66 (m, 2H);  $^{13}\text{C}$  NMR (100 MHz,  $\text{DMSO}-d_6$ ):  $\delta$  166.6, 145.1, 144.4, 143.9, 131.9, 131.5, 128.2, 124.6, 123.9, 122.8, 115.6, 112.6, 58.1, 37.8, 27.9; MALDI-MS ( $m/z$ ): Calculated for  $\text{C}_{16}\text{H}_{13}\text{NO}_3$  (M+H): 268.0974, Found (M+H): 268.0954.

### Synthesis of Nuevamine:

**Synthesis of Imide 4:** Suspension of phthalic anhydride (1 mmol) in toluene in an oven dried round bottom flask fitted with Dean-Stark apparatus was heated to reflux until complete dissolution of the 3,4-dimethoxy phthalic anhydride and no additional water was removed. To this solution was added homopiperonyl amine (1.2 mmol) and refluxing was continued until the water evolution was completed (12 h). Reaction mixture was concentrated under reduced pressure to give a residue which was purified through column chromatography to give 2-(3,4-methylenedioxyphenyl)ethyl)-4,5-dimethoxyisoindoline-1,3-dione **4** in pure form.

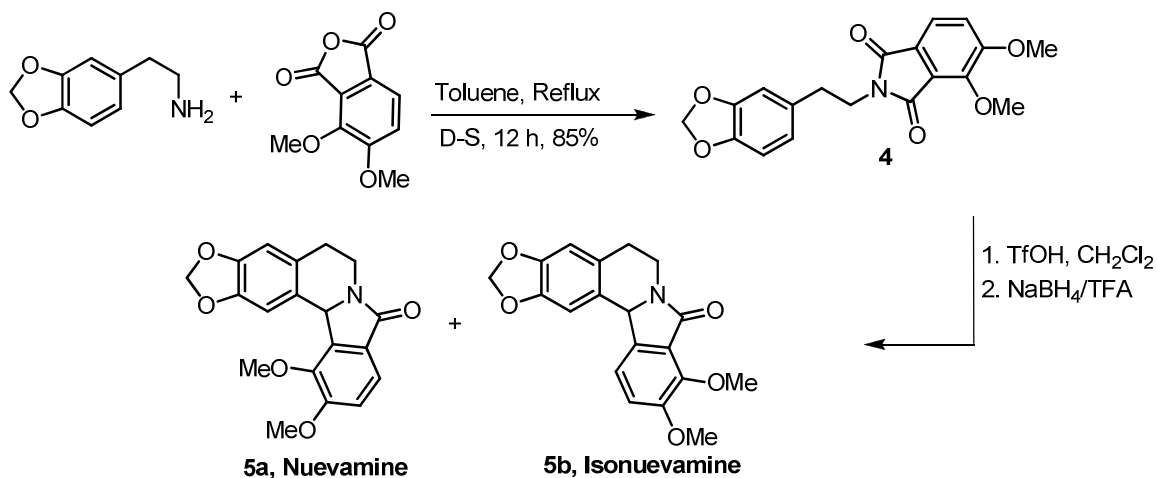

**Imide 4:** 302 mg, white solid, 85% yield; m.p. 149 °C (*Lit.*<sup>11</sup> 155-157 °C); IR (KBr, cm<sup>-1</sup>): 2994, 2937, 2844, 1767, 1708, 1606, 1496, 1442, 1391, 1345, 1267, 1043, 926; <sup>1</sup>H NMR (400 MHz, CDCl<sub>3</sub>): δ 7.52 (d, *J* = 8.0 Hz, 1H), 7.1 (d, *J* = 8.0 Hz, 1H), 6.74 (d, *J* = 1.3 Hz, 1H), 6.72-6.66 (m, 2H), 5.91 (s, 2H), 4.13 (s, 3H), 3.95 (s, 3H), 3.84-3.80 (m, 2H), 2.89-2.85 (m, 2H); <sup>13</sup>C NMR (100 MHz, CDCl<sub>3</sub>): δ 167.46, 166.1, 157.6, 147.6, 147.1, 146.2, 131.9, 124.6, 121.8, 121.7, 119.3, 115.7, 109.2, 108.2, 100.8, 62.5, 56.5, 39.4, 34.2.

**Synthesis of Nuevamine 5a:** An oven dried two neck round bottom flask bearing septum in side arm was cooled to room temperature under a steady stream of nitrogen gas flow. The flask was charged with stirring bar, imide **4** (71 mg, 0.2 mmol) and dry dichloromethane (10 ml) and cooled down to given temperature. To this solution was added TfOH (0.1 ml, 1 mmol) with stirring. After reported time the contents were brought to room temperature and NaBH<sub>4</sub> (1 mmol) was added followed by TFA (0.5 ml) and the solution was stirred until color disappears (additional NaBH<sub>4</sub> and TFA was used if color persists for long time). This mixture was evaporated to dryness under reduced pressure. The solid residue was dissolved in dichloromethane (20 ml) and the insoluble material was filtered off, the organic layer was dried over anhydrous Na<sub>2</sub>SO<sub>4</sub> and filtered. The solvent was evaporated under vacuum and the crude product was purified through silica gel column chromatography using ethyl acetate/hexane (50:50) as eluent to give nuevamine **5a** and its regioisomer Isonuevamine **5b** as mixture.

| S. No. | Temperature (°C) | Time (h) | % of Nuevamine <b>5a</b> <sup>a</sup> | Yield of ( <b>5a+5b</b> ) <sup>b</sup> |
|--------|------------------|----------|---------------------------------------|----------------------------------------|
| 1      | 0                | 0.5      | 52                                    | 86                                     |
| 2      | -20              | 1        | 71                                    | -- <sup>c</sup>                        |
| 3      | -40              | 12       | 80                                    | -- <sup>c</sup>                        |
| 4      | -60              | 20       | 85                                    | -- <sup>c</sup>                        |
| 5      | -78              | 36       | 88                                    | 92                                     |

<sup>a</sup> % of regioisomeric composition was ascertained by <sup>1</sup>H-NMR data

<sup>b</sup> Isolated Yield; <sup>c</sup> Yield was not calculated.

**Mixture of 10,11-Dimethoxy-5,11b-dihydro-6H-1,3-dioxo-6a-aza-indeno[5,6-c]fluoren-7-one (5a) and 8,9-Dimethoxy-5,11b-dihydro-6H-1,3-dioxo-6a-aza-indeno[5,6-c]fluoren-7-one (5b)**

59 mg (86% yield) and 63 mg (92% yield), IR (KBr,  $\text{cm}^{-1}$ ): 2972, 2940, 2841, 1681, 1620, 1446, 1408, 1273, 1220, 1035;  $^1\text{H}$  NMR (400 MHz,  $\text{CDCl}_3$ ):  $\delta$  7.58 (d,  $J = 8.0$  Hz, 1H), 7.43 (dd,  $J = 0.8, 8.4$  Hz, 1H), 7.32 (s, 1H), 7.14 (d,  $J = 8.0$  Hz, 1H), 7.07 (d,  $J = 8.4$ , 1H), 7.03 (s, 1H), 6.66 (s, 1H), 6.65 (s, 1H), 5.95 (d,  $J = 1.2$  Hz, 1H), 5.92 (d,  $J = 1.2$  Hz, 1H), 5.89 (d,  $J = 1.2$  Hz, 1H), 5.86 (d,  $J = 1.2$  Hz, 1H), 5.63 (s, 1H), 5.45 (s, 1H), 4.34-4.28 (m, 1H), 4.07 (s, 3H), 4.0-4.09 (m, 1H), 3.99 (s, 3H), 3.97 (s, 3H), 3.90 (s, 3H), 3.59-3.53 (m, 1H), 3.42-3.36 (m, 1H), 3.05-2.94 (m, 2H), 2.90-2.82 (m, 1H), 2.79-2.75 (m, 1H);  $^{13}\text{C}$  NMR (100 MHz,  $\text{CDCl}_3$ ):  $\delta$  167.6, 166.2, 155.5, 152.8, 146.7, 146.5, 146.4, 144.3, 137.6, 136.1, 128.8, 128.4, 128.3, 127.8, 126.6, 125.1, 119.7, 118.4, 116.2, 113.2, 109.0, 108.4, 107.5, 105.5, 101.1, 100.9, 62.5, 60.5, 58.4, 58.0, 56.7, 56.3, 38.8, 38.3, 29.3, 28.9.

**Crystal Structure of the compounds 2h, 2m, 2j and 2k<sup>12</sup>**

**2h, CCDC 828126**

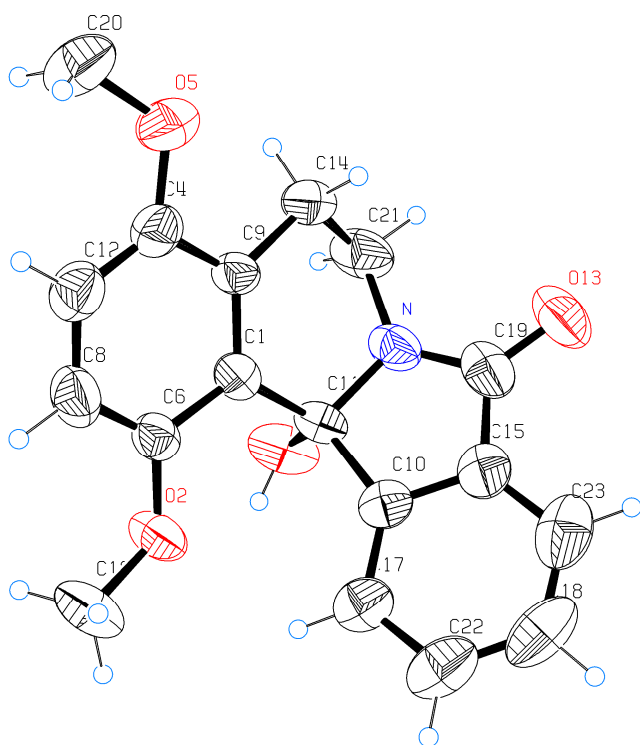

**2j, CCDC 828125**

**2m, CCDC 828128**

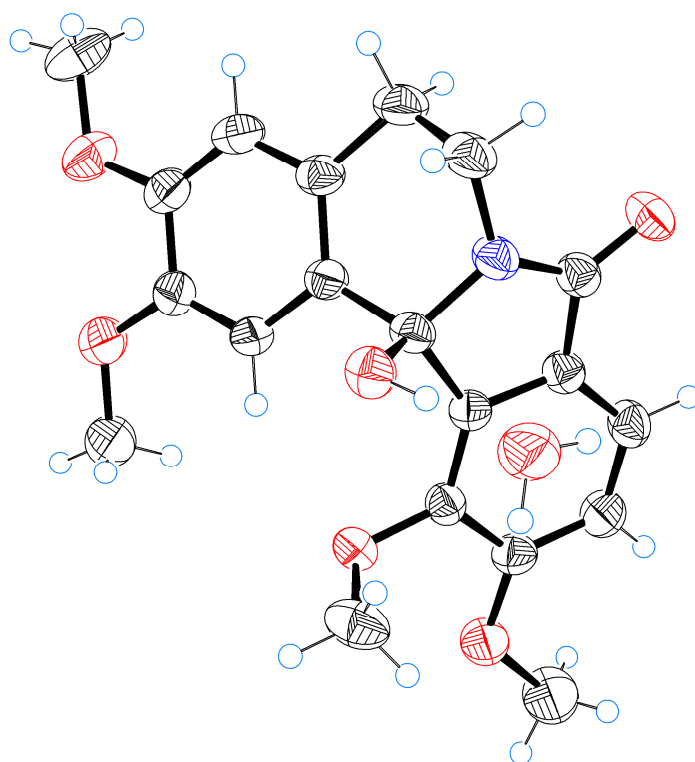

**2k, CCDC 828124**

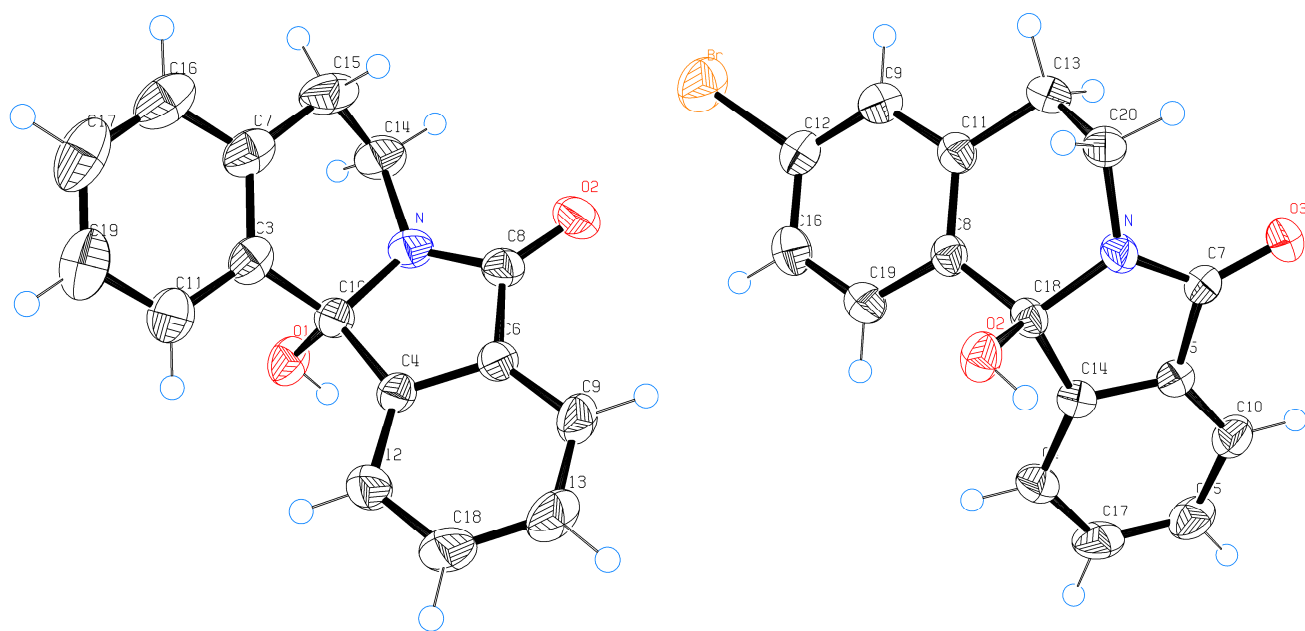

### References:

1. (a) J. R. Merchant and A. J. Mountwala, *J. Org. Chem.*, 1958, **23**, 1774; (b) A. K. Sinhababu and R. T. Borchardt, *Tetrahedron Lett.*, 1983, **24**, 227; (c) M. Trost, V. S. C. Yeh, H. Ito and N. Bremeyer, *Org. Lett.*, 2002, **4**, 2621.
2. W. L. F. Armarego and C. L. L. Chai. *Purification of Laboratory Chemicals*, 6<sup>th</sup> ed.; Elsevier, UK, 2009.
3. U. Braun, A. T. Shulgin, G. Braun and T. Sargent, *J. Med. Chem.*, 1977, **20**, 1543.
4. M. I. Collado, I. Manteca, N. Sotomayor, M. J. Villa and E. Lete. *J. Org. Chem.*, 1997, **62**, 2080.
5. R. H. F. Manske, A. E. Ledingham and H. L. Holmes, *Can. J. Res. Sect.* 1945, **23B**, 100.
6. J. Ungwitayatorn, C. Wiwat, C. Matayatsuk, J. Pimthon and S. Piyaviriyakul, *Chin. J. Chem.*, 2008, **26**, 379.
7. J. Fraga-Dubreuil, G. Çomak, A. W. Taylor and M. Poliakoff, *Green Chem.*, 2007, **9**, 1067.
8. D. Singha and J. B. Baruah, *Cryst. Growth Des.*, 2011, **11**, 768.
9. P. B. Wakchaure, S. Easwar, V. G. Puranik and N. P. Argade, *Tetrahedron*, 2008, **64**, 1786.
10. I. Osante, M. I. Collado, E. Lete and N. Sotomayor, *Eur. J. Org. Chem.* 2001, 1267.
11. P. B. Wakchaure, S. K. Sunitha and N. P. Argade, *Indian J. Chem., Sect. B: Org. Chem. Incl. Med. Chem.*, 2011, **50B**, 868.

12. CCDC No 828124-828126, 828128 contains the supplementary crystallographic data for this paper. These data can be obtained free of charge from the Cambridge Crystallographic Data Centre *via* [www.ccdc.cam.ac.uk/data\\_request/cif](http://www.ccdc.cam.ac.uk/data_request/cif).



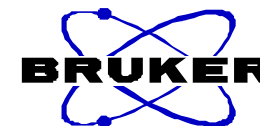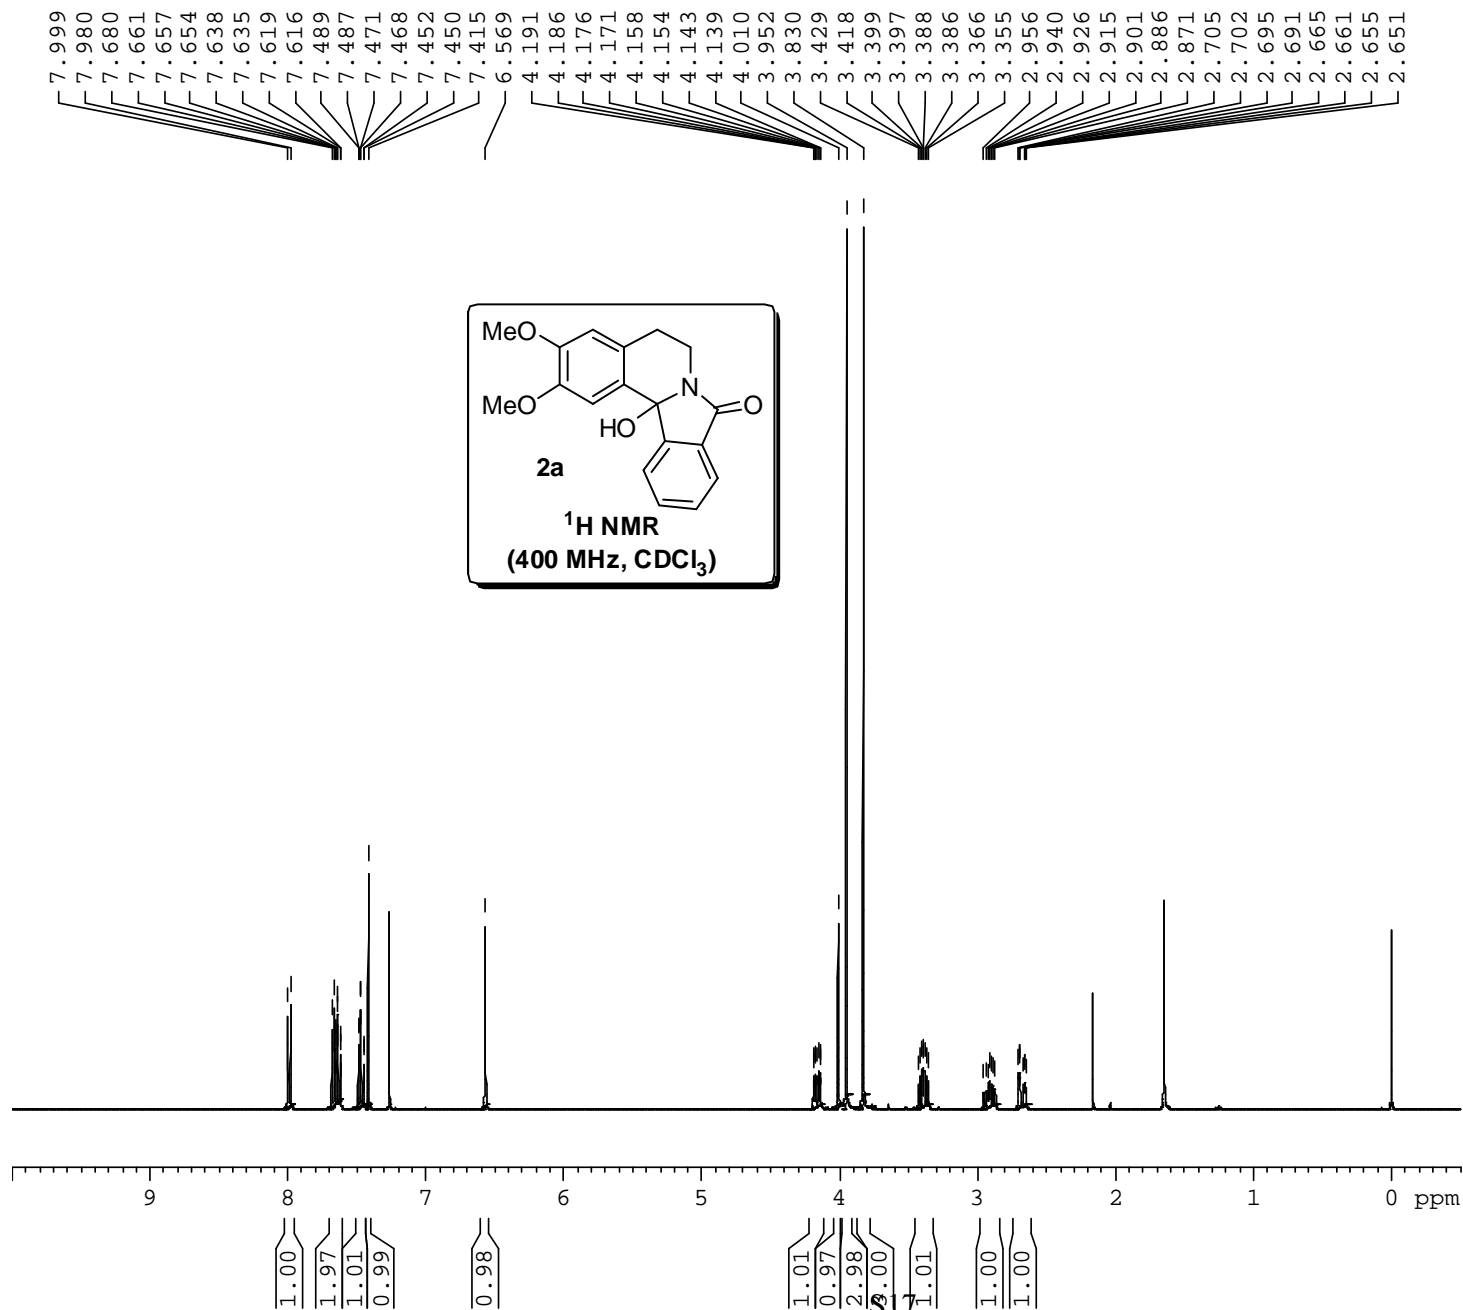

Current Data Parameters  
NAME JS-3,4-HL-1a  
EXPNO 1  
PROCNO 1

F2 - Acquisition Parameters  
Date\_ 20100312  
Time 12.27  
INSTRUM spect  
PROBHD 5 mm BBO BB-1H  
PULPROG zg30  
TD 32768  
SOLVENT CDCl3  
NS 32  
DS 2  
SWH 8223.685 Hz  
FIDRES 0.250967 Hz  
AQ 1.9923444 sec  
RG 362  
DW 60.800 usec  
DE 6.00 usec  
TE 296.3 K  
D1 2.00000000 sec  
TD0 1

==== CHANNEL f1 =====  
NUC1 1H  
P1 14.00 usec  
PL1 -0.90 dB  
SFO1 400.1324710 MHz

F2 - Processing parameters  
SI 32768  
SF 400.1300031 MHz  
WDW EM  
SSB 0  
LB 0.30 Hz  
GB 0  
PC 1.00

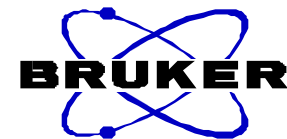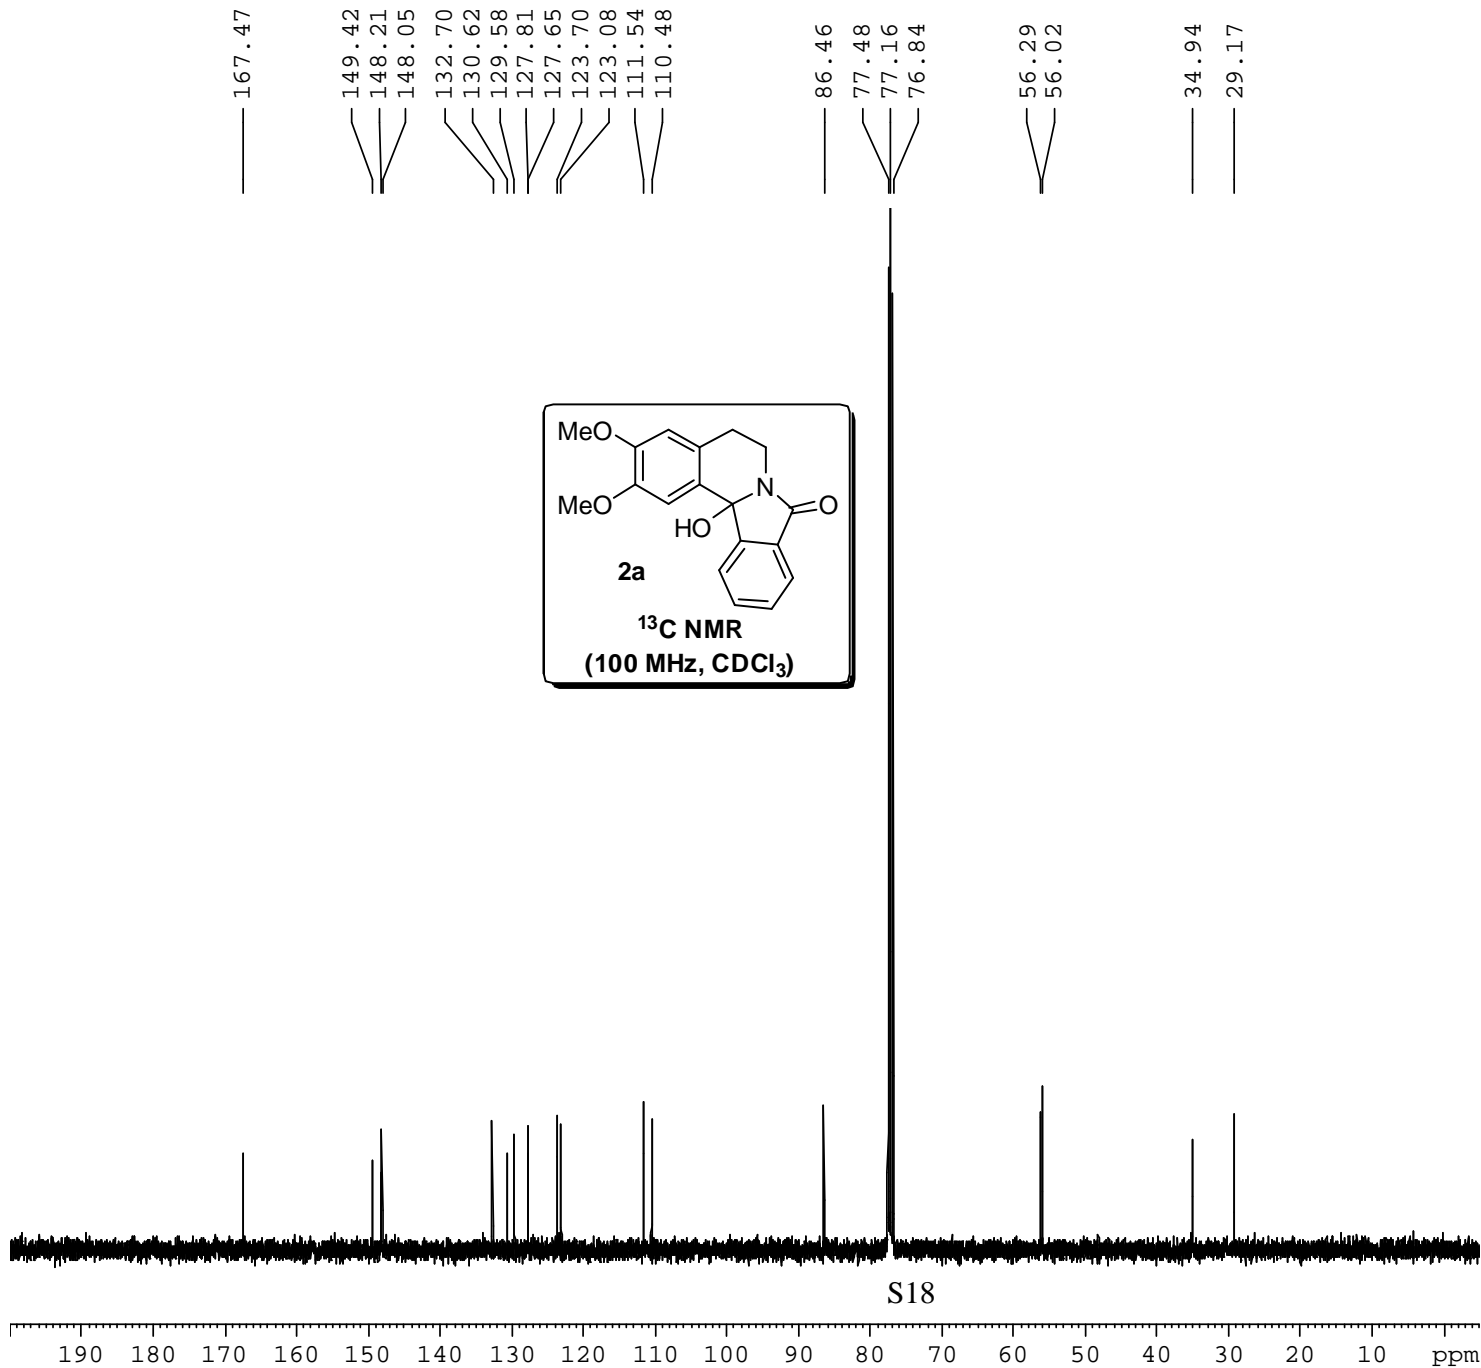

Current Data Parameters  
NAME JS-III-105 1a  
EXPNO 1  
PROCNO 1

F2 - Acquisition Parameters  
Date\_ 20100316  
Time 11.40  
INSTRUM spect  
PROBHD 5 mm BBO BB-1H  
PULPROG zgpg30  
TD 65536  
SOLVENT CDCl3  
NS 256  
DS 4  
SWH 24038.461 Hz  
FIDRES 0.366798 Hz  
AQ 1.3631988 sec  
RG 57  
DW 20.800 usec  
DE 6.00 usec  
TE 298.0 K  
D1 2.00000000 sec  
d11 0.03000000 sec  
DELTA 1.89999998 sec  
TD0 1

==== CHANNEL f1 =====  
NUC1 13C  
P1 9.50 usec  
PL1 -0.60 dB  
SF01 100.6228298 MHz

==== CHANNEL f2 =====  
CPDPRG2 waltz16  
NUC2 1H  
PCPD2 90.00 usec  
PL12 15.60 dB  
PL13 15.60 dB  
PL2 -0.90 dB  
SFO2 400.1316005 MHz

F2 - Processing parameters  
SI 32768  
SF 100.6127554 MHz  
WDW EM  
SSB 0  
LB 1.00 Hz  
GB 0  
PC 1.40

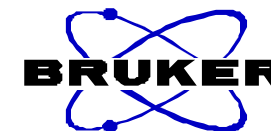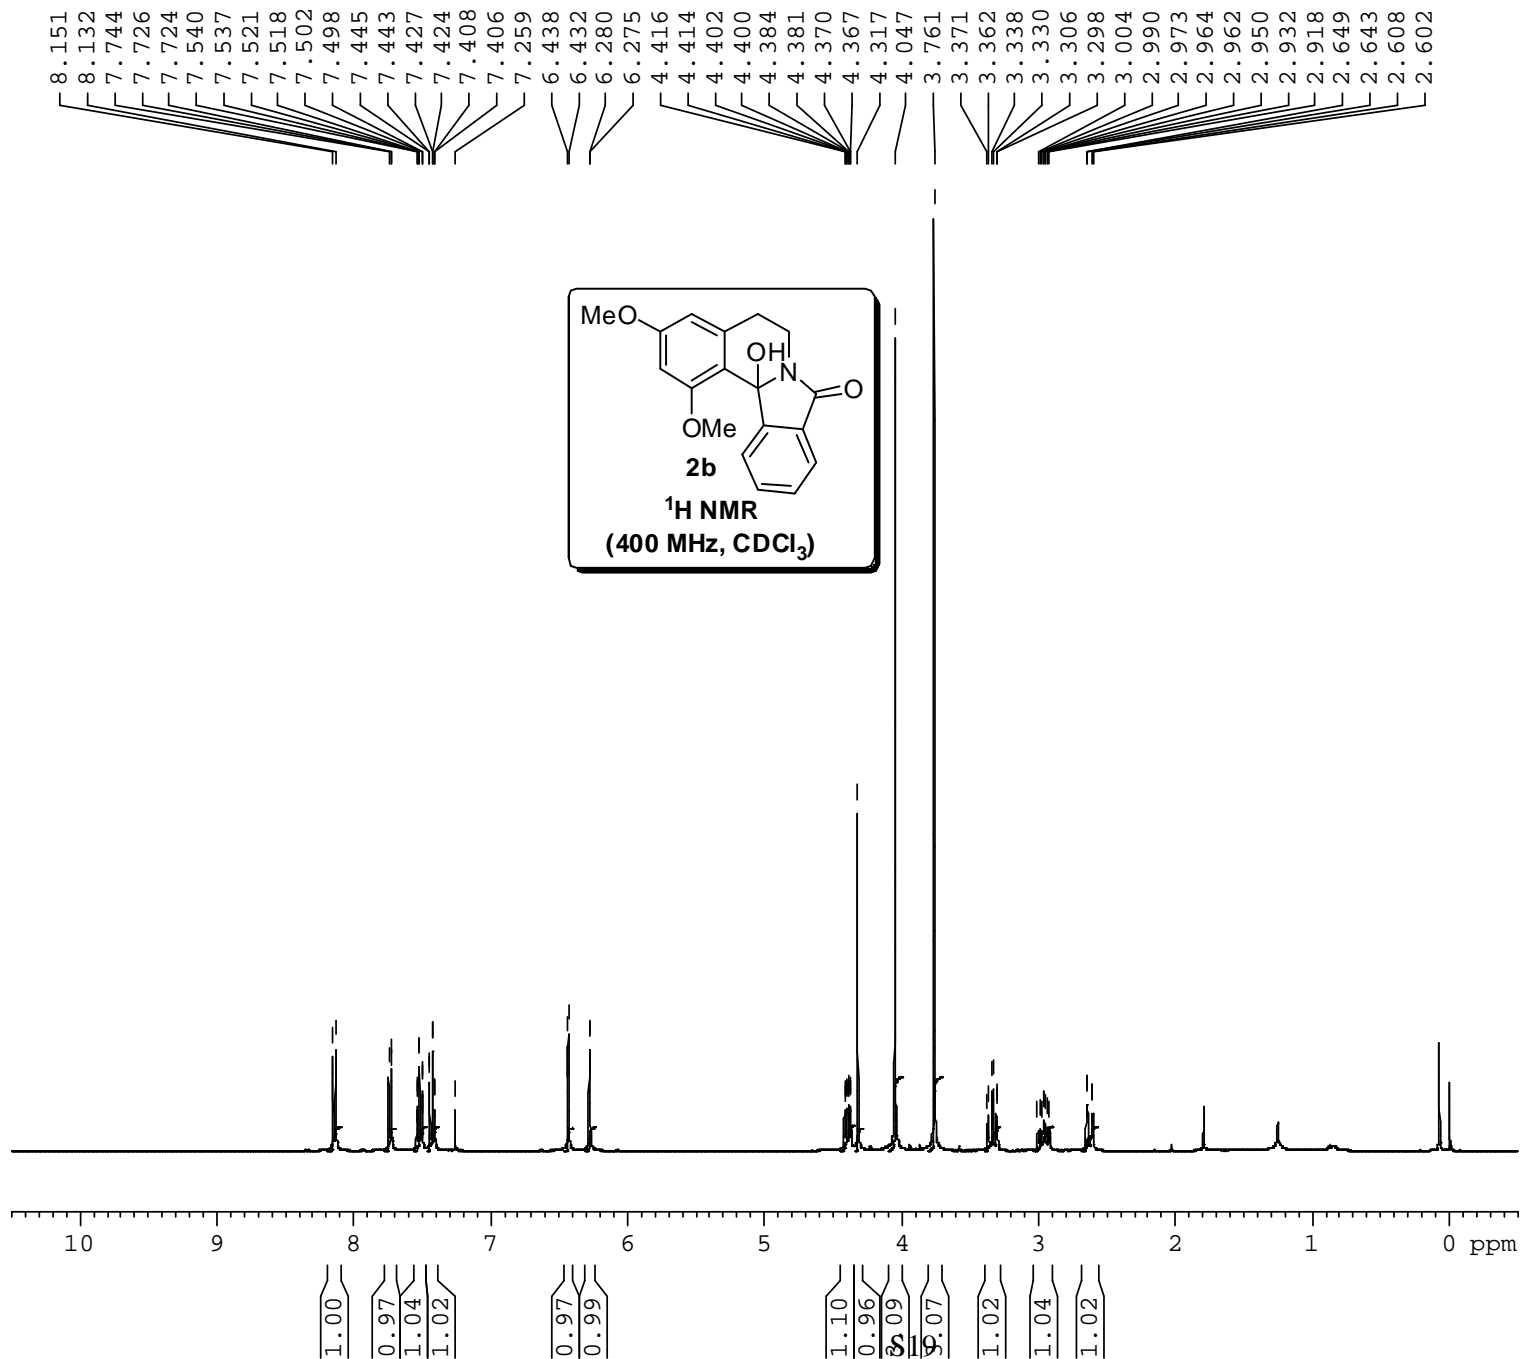

Current Data Parameters  
NAME CRR-JS-1-37-1  
EXPNO 1  
PROCNO 1

F2 - Acquisition Parameters  
Date\_ 20080720  
Time 22.45  
INSTRUM spect  
PROBHD 5 mm BBO BB-1H  
PULPROG zg30  
TD 32768  
SOLVENT CDCl3  
NS 8  
DS 2  
SWH 8223.685 Hz  
FIDRES 0.250967 Hz  
AQ 1.9923444 sec  
RG 181  
DW 60.800 usec  
DE 6.00 usec  
TE 294.8 K  
D1 2.00000000 sec  
TD0 1

==== CHANNEL f1 =====  
NUC1 1H  
P1 14.00 usec  
PL1 -0.90 dB  
SFO1 400.1324710 MHz

F2 - Processing parameters  
SI 32768  
SF 400.1300054 MHz  
WDW EM  
SSB 0  
LB 0.30 Hz  
GB 0  
PC 1.00

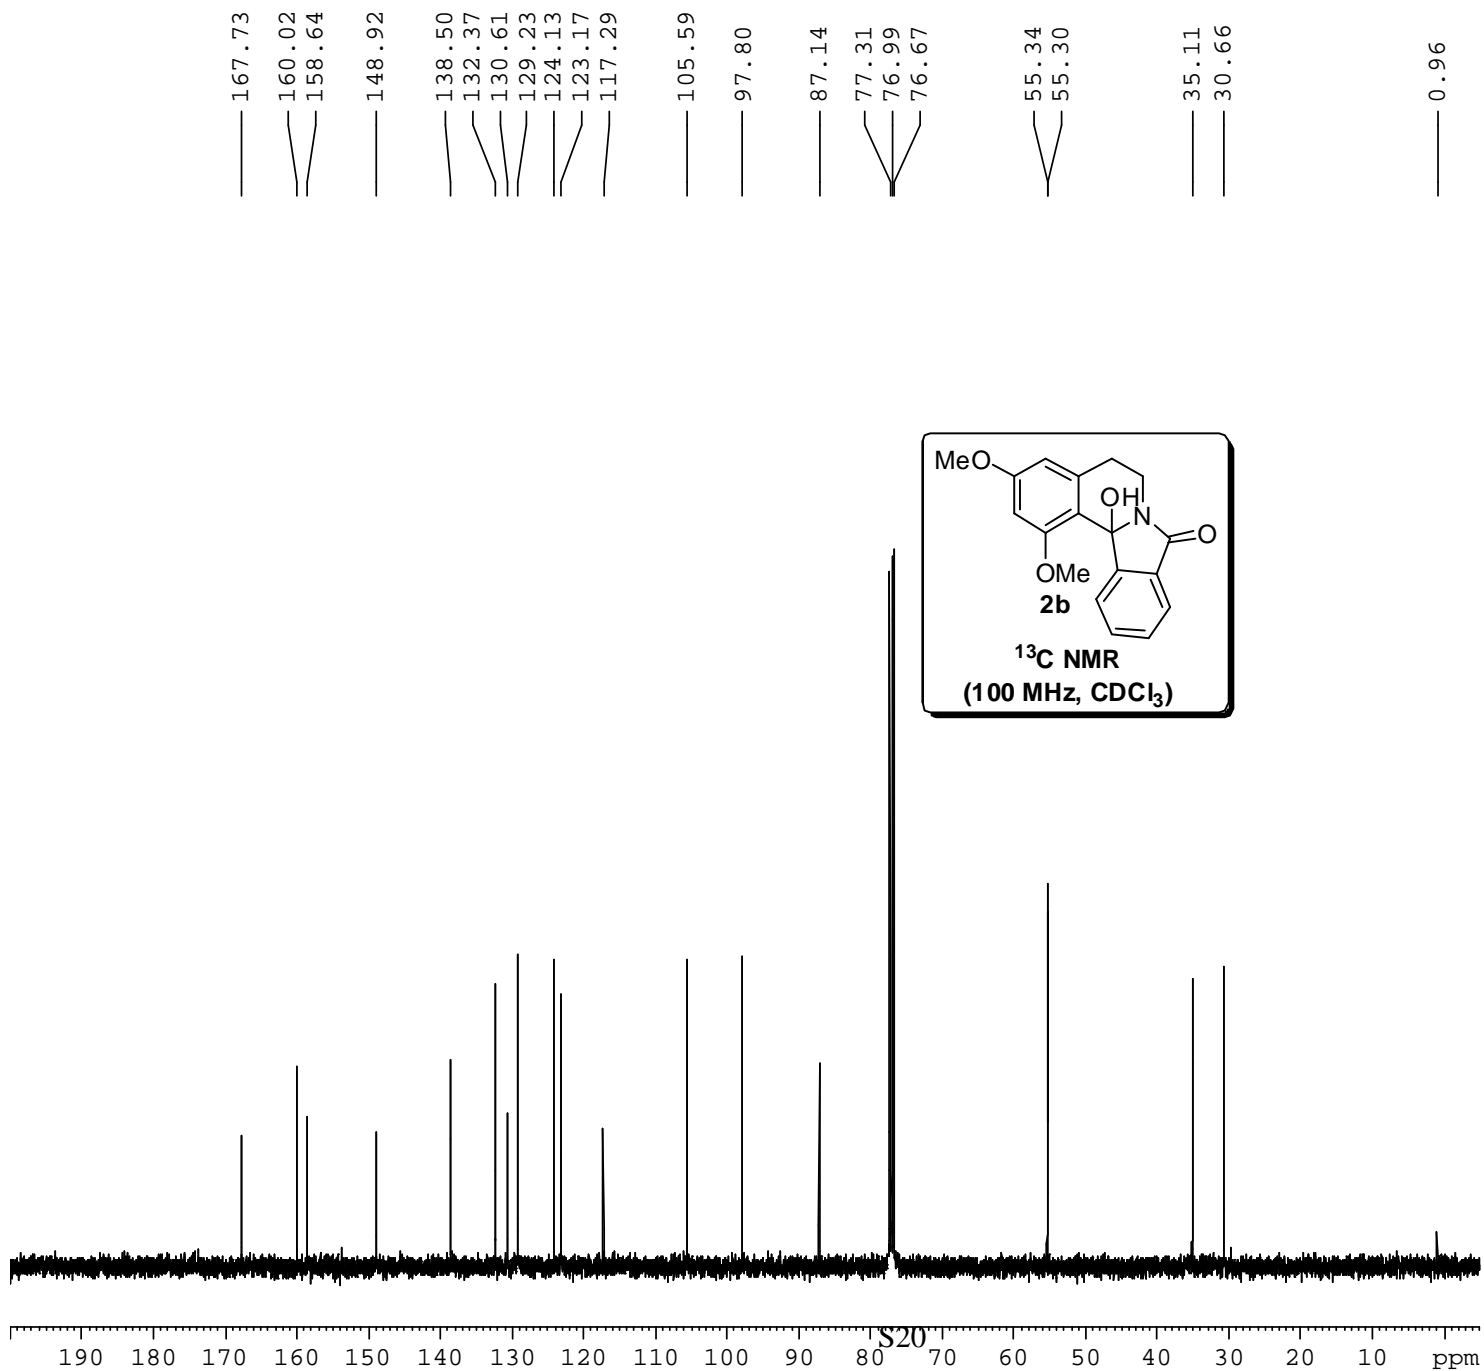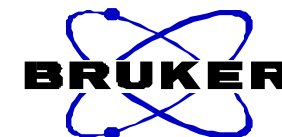

Current Data Parameters  
NAME CRR-JS-1-37-1  
EXPNO 2  
PROCNO 1

F2 - Acquisition Parameters  
Date\_ 20080720  
Time 23.00  
INSTRUM spect  
PROBHD 5 mm BBO BB-1H  
PULPROG zgpg30  
TD 65536  
SOLVENT CDCl3  
NS 256  
DS 4  
SWH 24038.461 Hz  
FIDRES 0.366798 Hz  
AQ 1.3631988 sec  
RG 575  
DW 20.800 usec  
DE 6.00 usec  
TE 295.4 K  
D1 2.00000000 sec  
d11 0.03000000 sec  
DELTA 1.89999998 sec  
TD0 1

==== CHANNEL f1 =====  
NUC1 13C  
P1 9.50 usec  
PL1 -0.60 dB  
SFO1 100.6228298 MHz

==== CHANNEL f2 =====  
CPDPRG2 waltz16  
NUC2 1H  
PCPD2 90.00 usec  
PL12 15.60 dB  
PL13 15.60 dB  
PL2 -0.90 dB  
SFO2 400.1316005 MHz

F2 - Processing parameters  
SI 32768  
SF 100.6127750 MHz  
WDW EM  
SSB 0  
LB 1.00 Hz  
GB 0  
PC 1.40

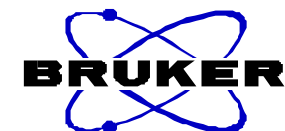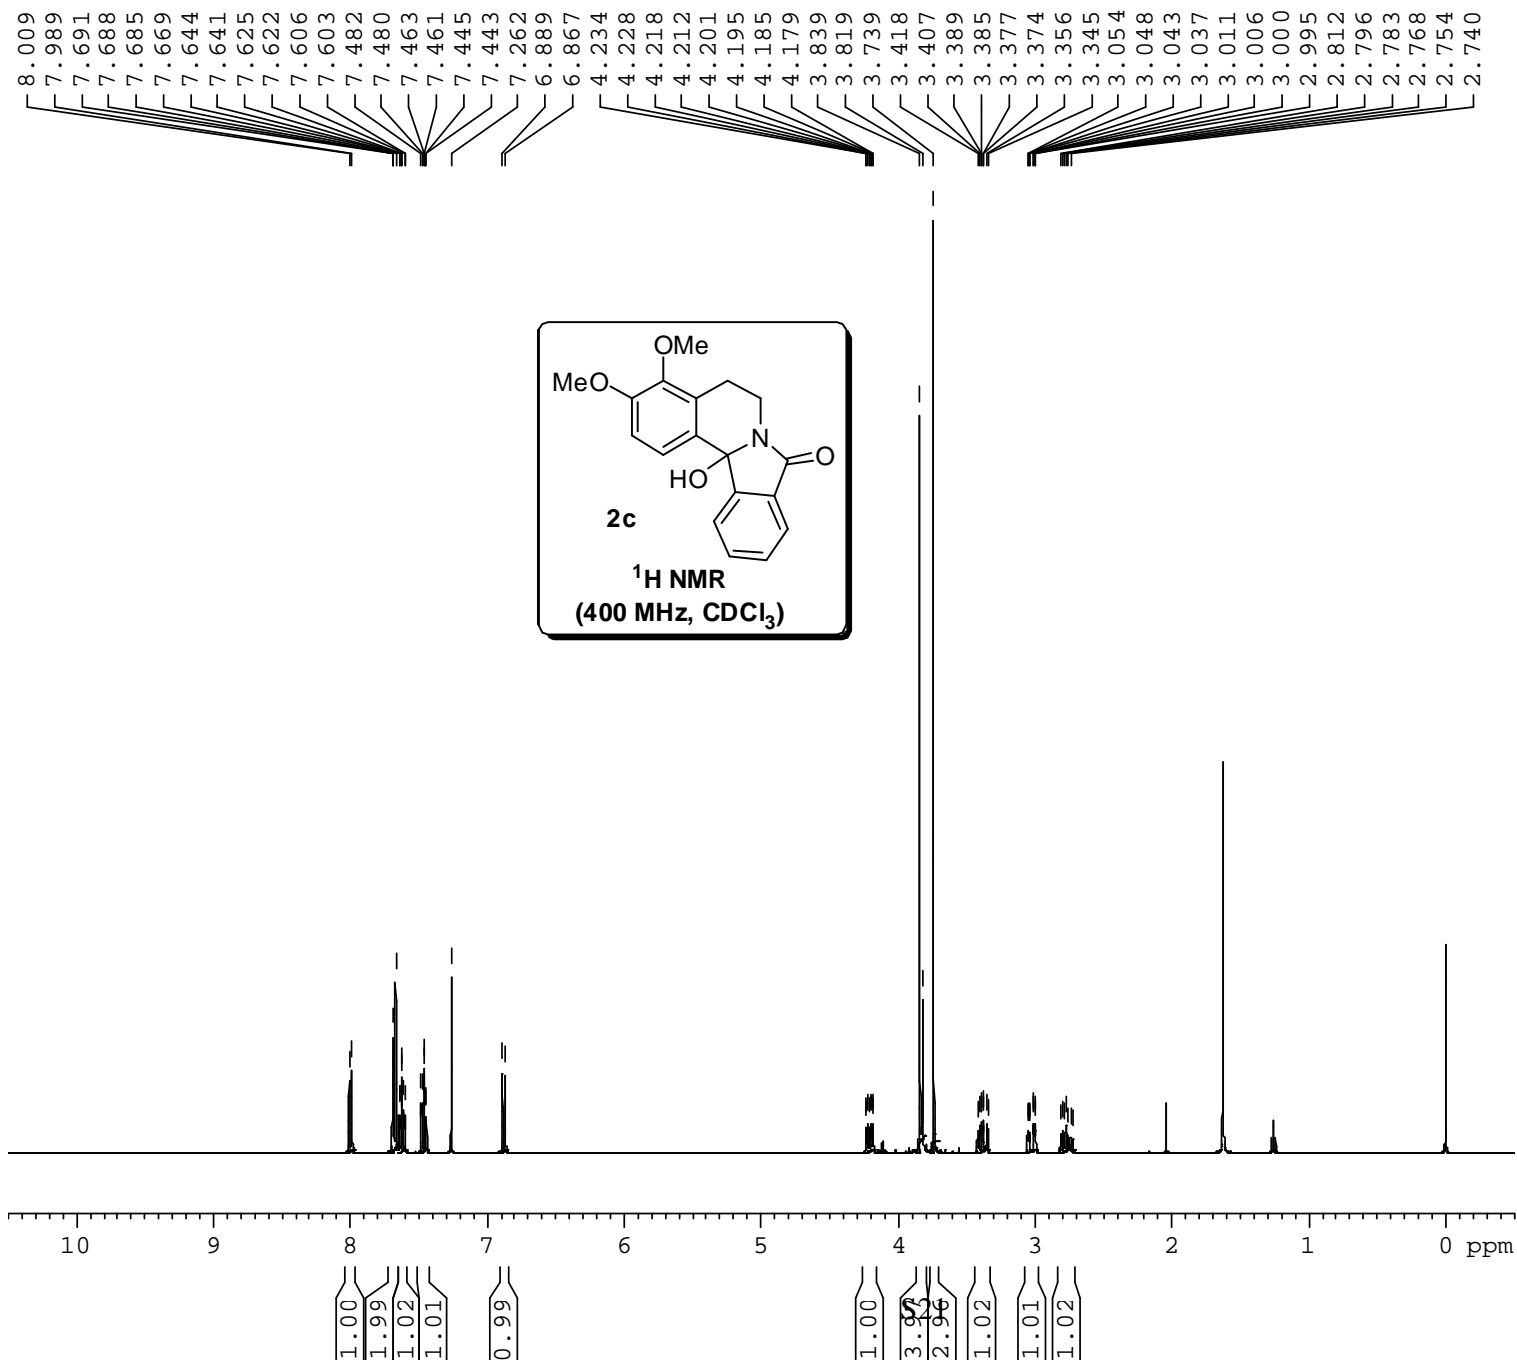

Current Data Parameters  
NAME JS-III-16-2  
EXPNO 1  
PROCNO 1

F2 - Acquisition Parameters  
Date\_ 20090528  
Time 13.15  
INSTRUM spect  
PROBHD 5 mm BBO BB-1H  
PULPROG zg30  
TD 32768  
SOLVENT CDCl3  
NS 4  
DS 2  
SWH 8223.685 Hz  
FIDRES 0.250967 Hz  
AQ 1.9923444 sec  
RG 456  
DW 60.800 usec  
DE 6.00 usec  
TE 296.0 K  
D1 2.00000000 sec  
TD0 1

==== CHANNEL f1 =====  
NUC1 1H  
P1 14.00 usec  
PL1 -0.90 dB  
SFO1 400.1324710 MHz

F2 - Processing parameters  
SI 32768  
SF 400.1300040 MHz  
WDW EM  
SSB 0  
LB 0.30 Hz  
GB 0  
PC 1.00

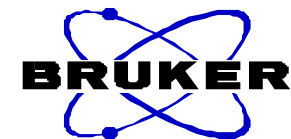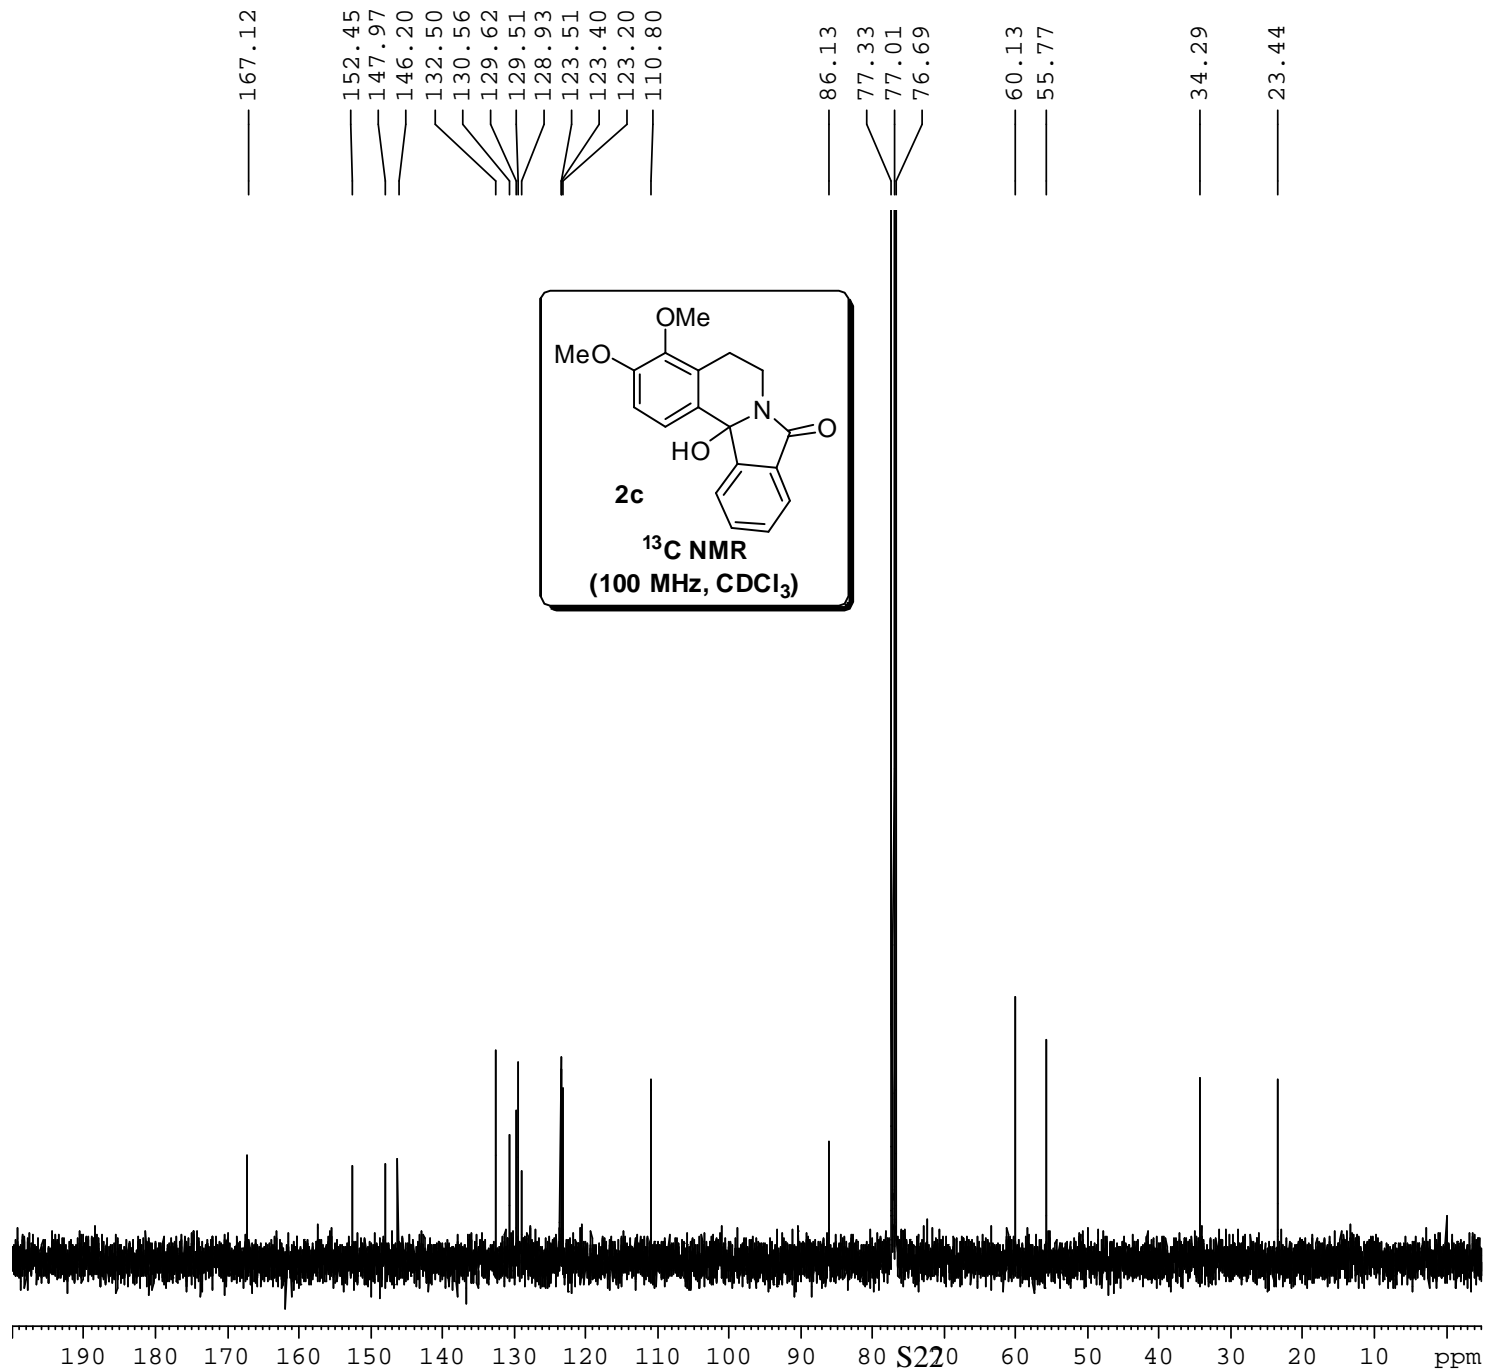

Current Data Parameters  
NAME JS-III-16-2  
EXPNO 2  
PROCNO 1

F2 - Acquisition Parameters  
Date\_ 20090528  
Time 13.31  
INSTRUM spect  
PROBHD 5 mm BBO BB-1H  
PULPROG zgpg30  
TD 65536  
SOLVENT CDCl3  
NS 256  
DS 2  
SWH 24038.461 Hz  
FIDRES 0.366798 Hz  
AQ 1.3631988 sec  
RG 575  
DW 20.800 usec  
DE 6.00 usec  
TE 296.7 K  
D1 2.00000000 sec  
d11 0.03000000 sec  
DELTA 1.89999998 sec  
TD0 1

==== CHANNEL f1 =====  
NUC1 13C  
P1 9.50 usec  
PL1 -0.60 dB  
SFO1 100.6228298 MHz

==== CHANNEL f2 =====  
CPDPRG2 waltz16  
NUC2 1H  
PCPD2 90.00 usec  
PL12 15.60 dB  
PL13 15.60 dB  
PL2 -0.90 dB  
SFO2 400.1316005 MHz

F2 - Processing parameters  
SI 32768  
SF 100.6127690 MHz  
WDW EM  
SSB 0  
LB 1.00 Hz  
GB 0  
PC 1.40

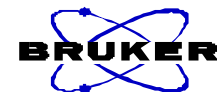

Current Data Parameters  
NAME JS-3-PTH-CYCL  
EXPNO 1  
PROCNO 1

F2 - Acquisition Parameters  
Date\_ 20100310  
Time 23.14  
INSTRUM spect  
PROBHD 5 mm BBO BB-1H  
PULPROG zg30  
TD 32768  
SOLVENT DMSO  
NS 16  
DS 2  
SWH 8223.685 Hz  
FIDRES 0.250967 Hz  
AQ 1.9923444 sec  
RG 456  
DW 60.800 usec  
DE 6.00 usec  
TE 296.9 K  
D1 2.00000000 sec  
TD0 1

==== CHANNEL f1 =====  
NUC1 1H  
P1 14.00 usec  
PL1 -0.90 dB  
SFO1 400.1324710 MHz

F2 - Processing parameters  
SI 32768  
SF 400.1299954 MHz  
WDW EM  
SSB 0  
LB 0.30 Hz  
GB 0  
PC 1.00

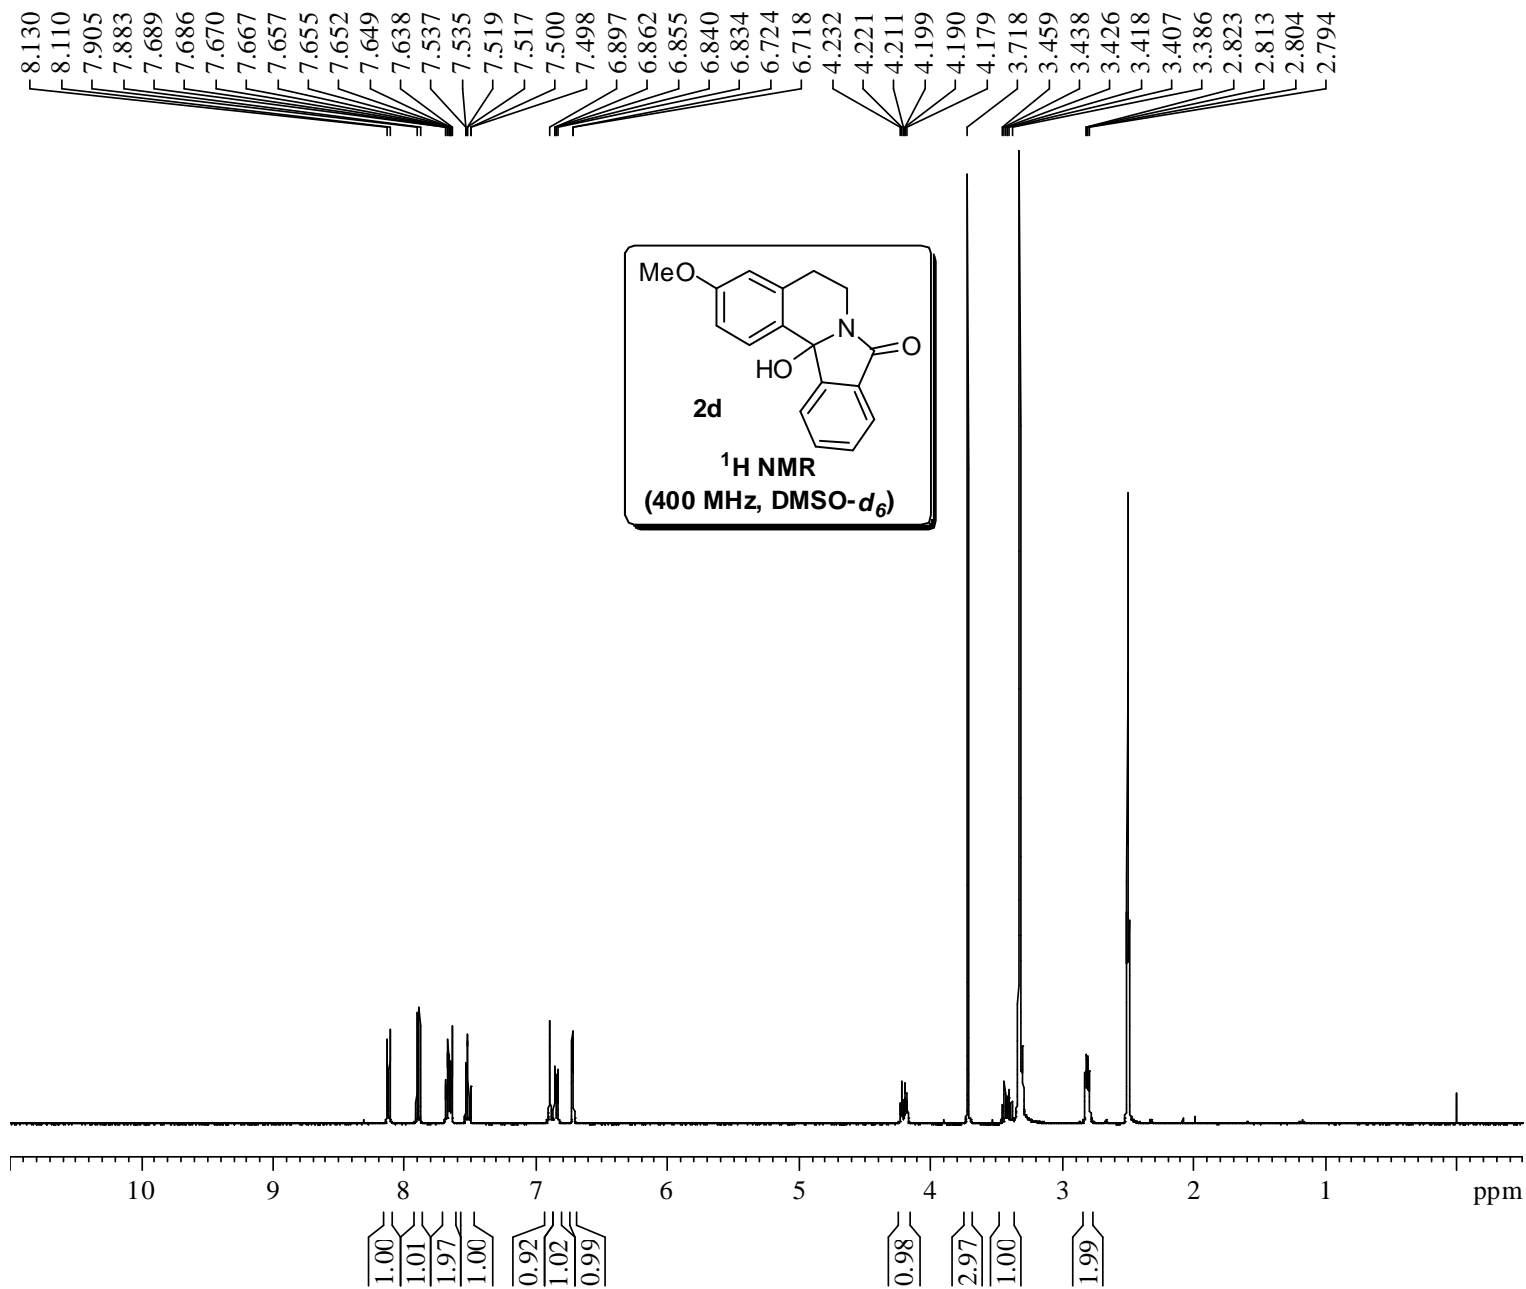

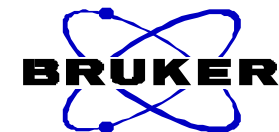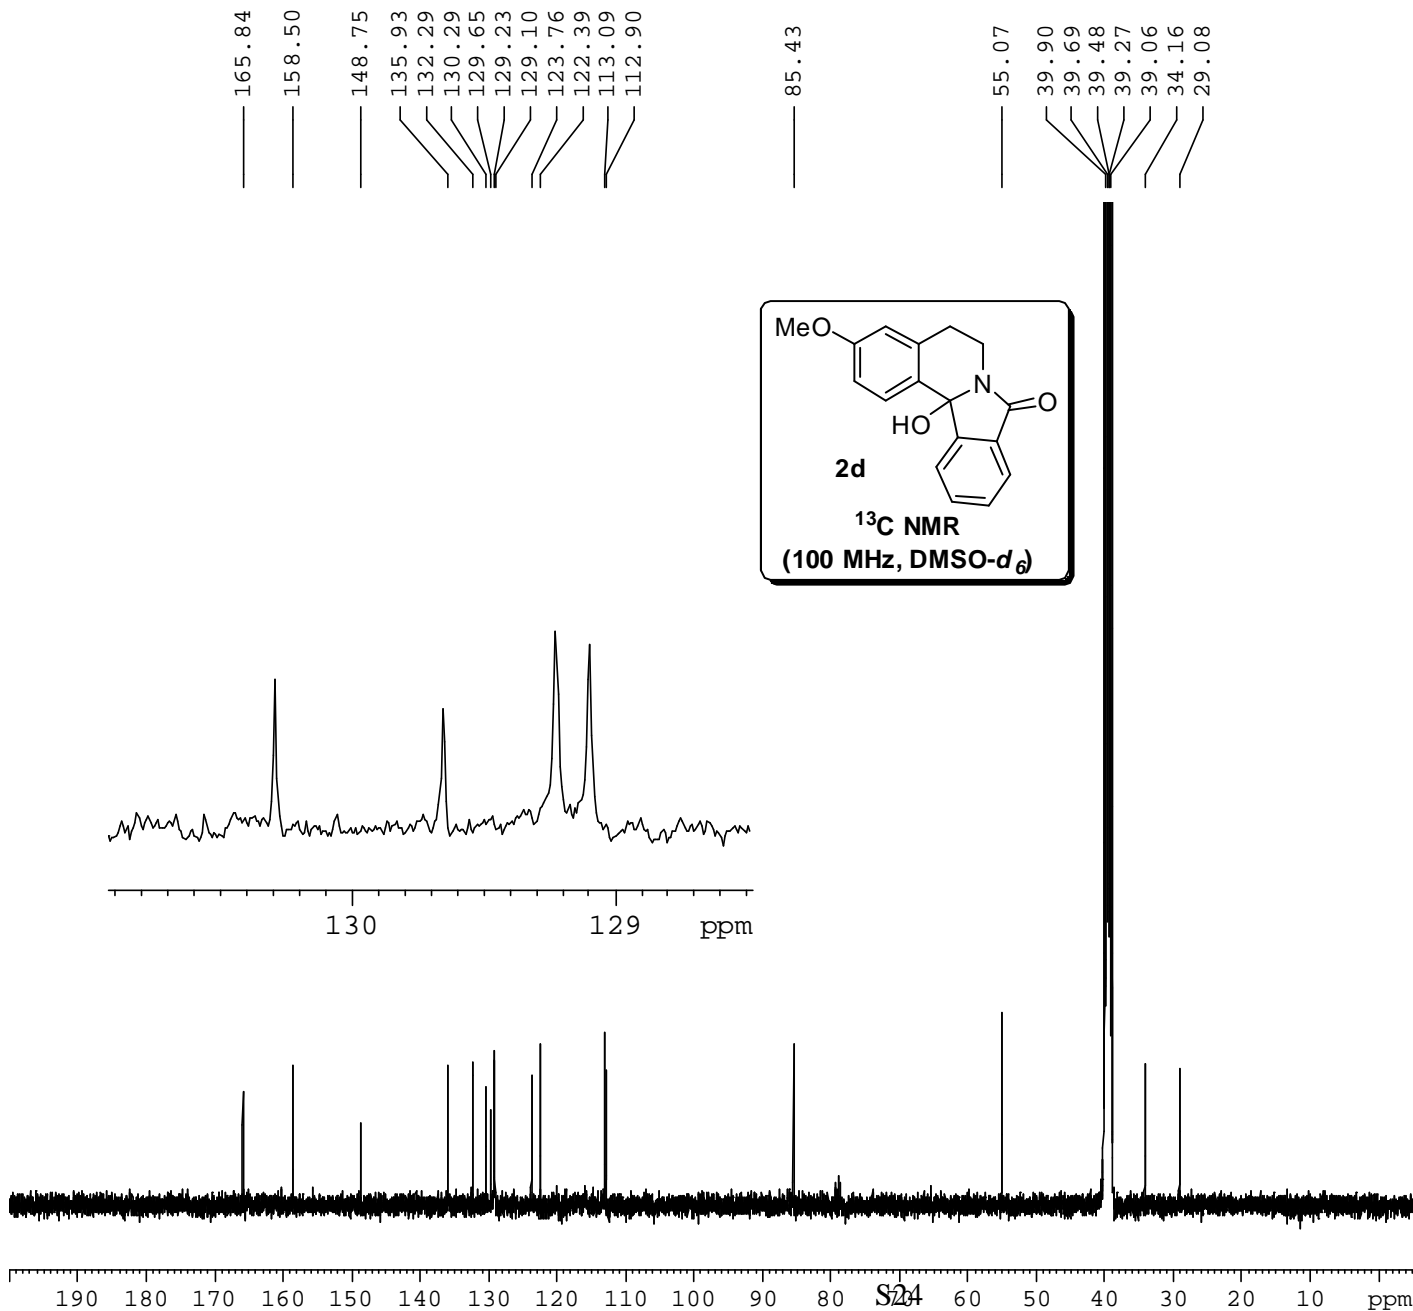

Current Data Parameters  
NAME JS-3-PTH-CYCL  
EXPNO 2  
PROCNO 1

F2 - Acquisition Parameters  
Date\_ 20100310  
Time 23.34  
INSTRUM spect  
PROBHD 5 mm BBO BB-1H  
PULPROG zgpg30  
TD 65536  
SOLVENT DMSO  
NS 7000  
DS 4  
SWH 24038.461 Hz  
FIDRES 0.366798 Hz  
AQ 1.3631988 sec  
RG 2050  
DW 20.800 usec  
DE 6.00 usec  
TE 297.7 K  
D1 2.00000000 sec  
d11 0.03000000 sec  
DELTA 1.89999998 sec  
TD0 1

=====  
CHANNEL f1  
NUC1 13C  
P1 9.50 usec  
PL1 -0.60 dB  
SFO1 100.6228298 MHz

=====  
CHANNEL f2  
CPDPRG2 waltz16  
NUC2 1H  
PCPD2 90.00 usec  
PL12 15.60 dB  
PL13 15.60 dB  
PL2 -0.90 dB  
SFO2 400.1316005 MHz

F2 - Processing parameters  
SI 32768  
SF 100.6128193 MHz  
WDW EM  
SSB 0  
LB 1.00 Hz  
GB 0  
PC 1.40



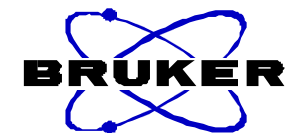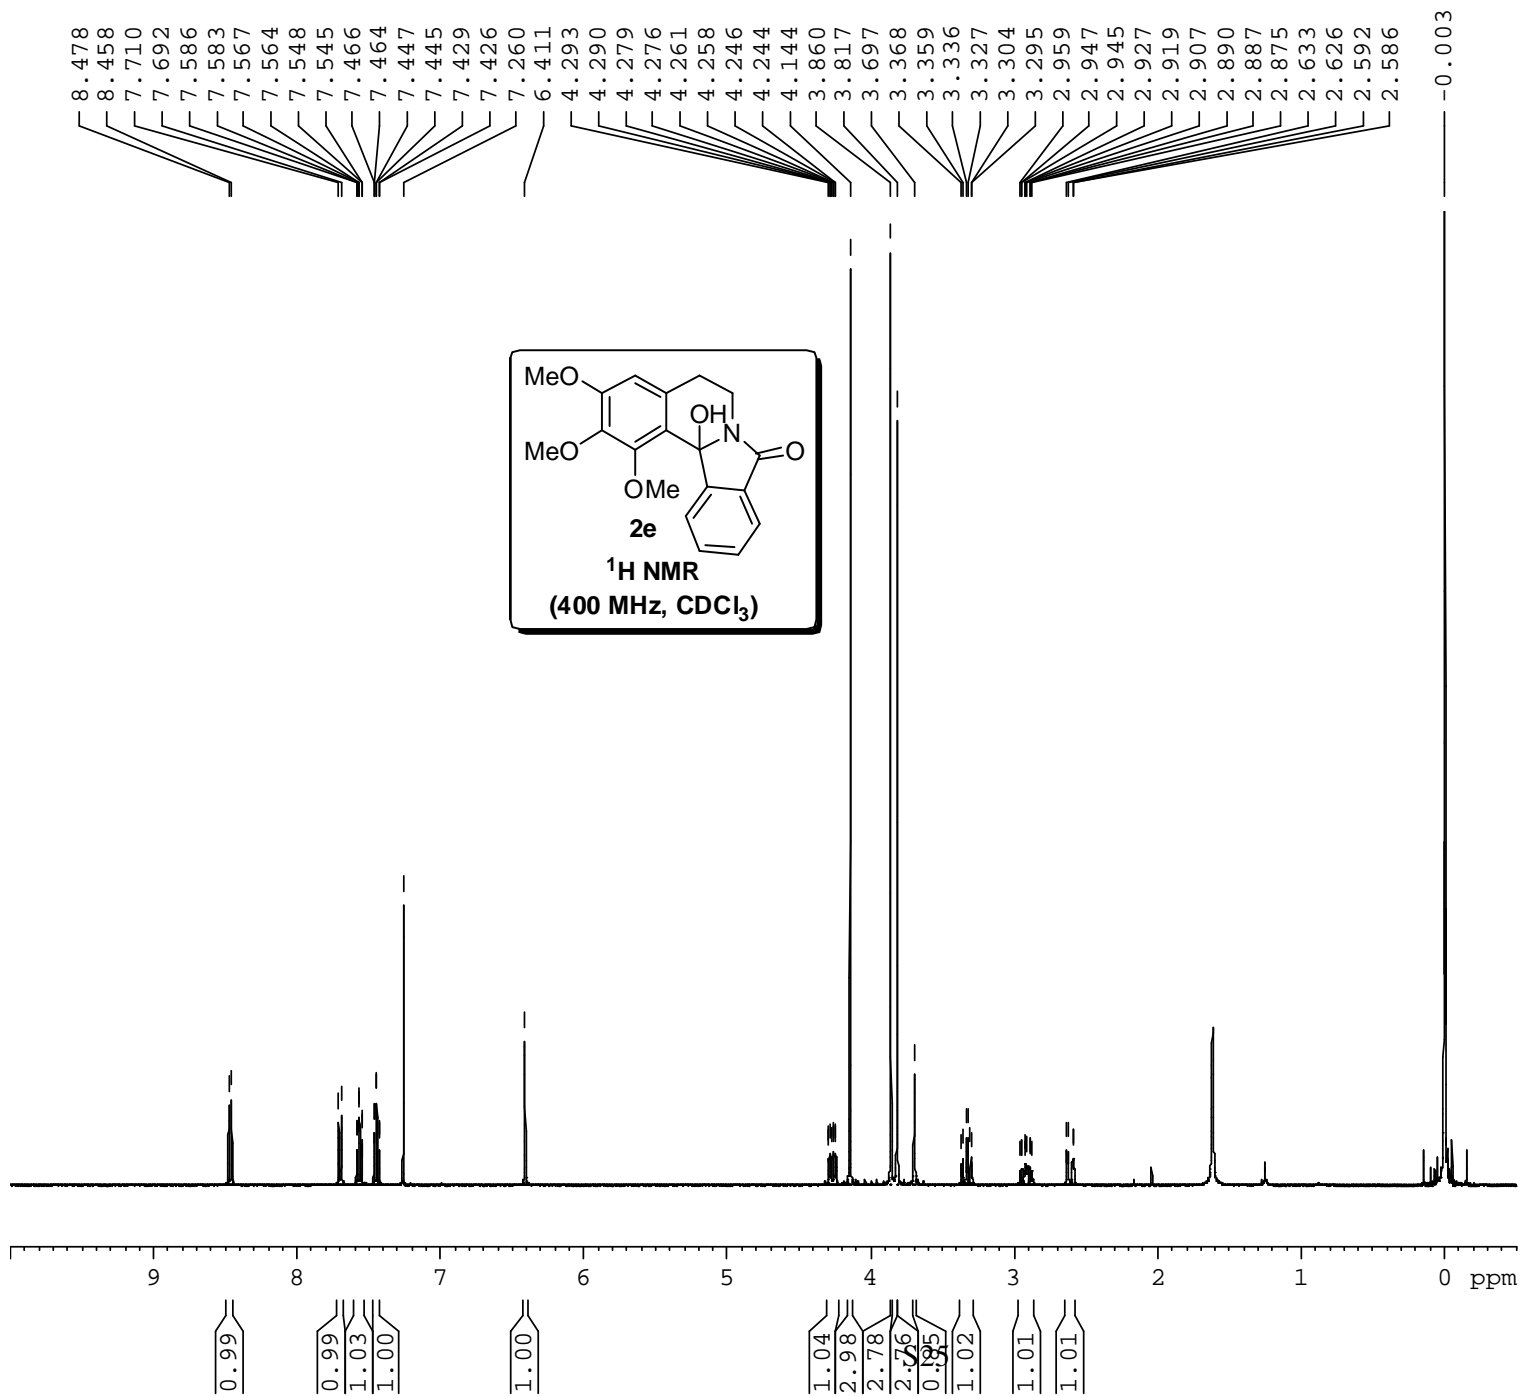

Current Data Parameters  
NAME JS-345-PTC  
EXPNO 1  
PROCNO 1

F2 - Acquisition Parameters  
Date\_ 20090317  
Time 10.01  
INSTRUM spect  
PROBHD 5 mm BBO BB-1H  
PULPROG zg30  
TD 32768  
SOLVENT CDCl3  
NS 4  
DS 2  
SWH 8223.685 Hz  
FIDRES 0.250967 Hz  
AQ 1.9923444 sec  
RG 287  
DW 60.800 usec  
DE 6.00 usec  
TE 293.6 K  
D1 2.00000000 sec  
TD0 1

==== CHANNEL f1 =====  
NUC1 1H  
P1 14.00 usec  
PL1 -0.90 dB  
SFO1 400.1324710 MHz

F2 - Processing parameters  
SI 32768  
SF 400.1300048 MHz  
WDSB EM  
SSB 0  
LB 0.30 Hz  
GB 0  
PC 1.00

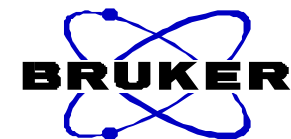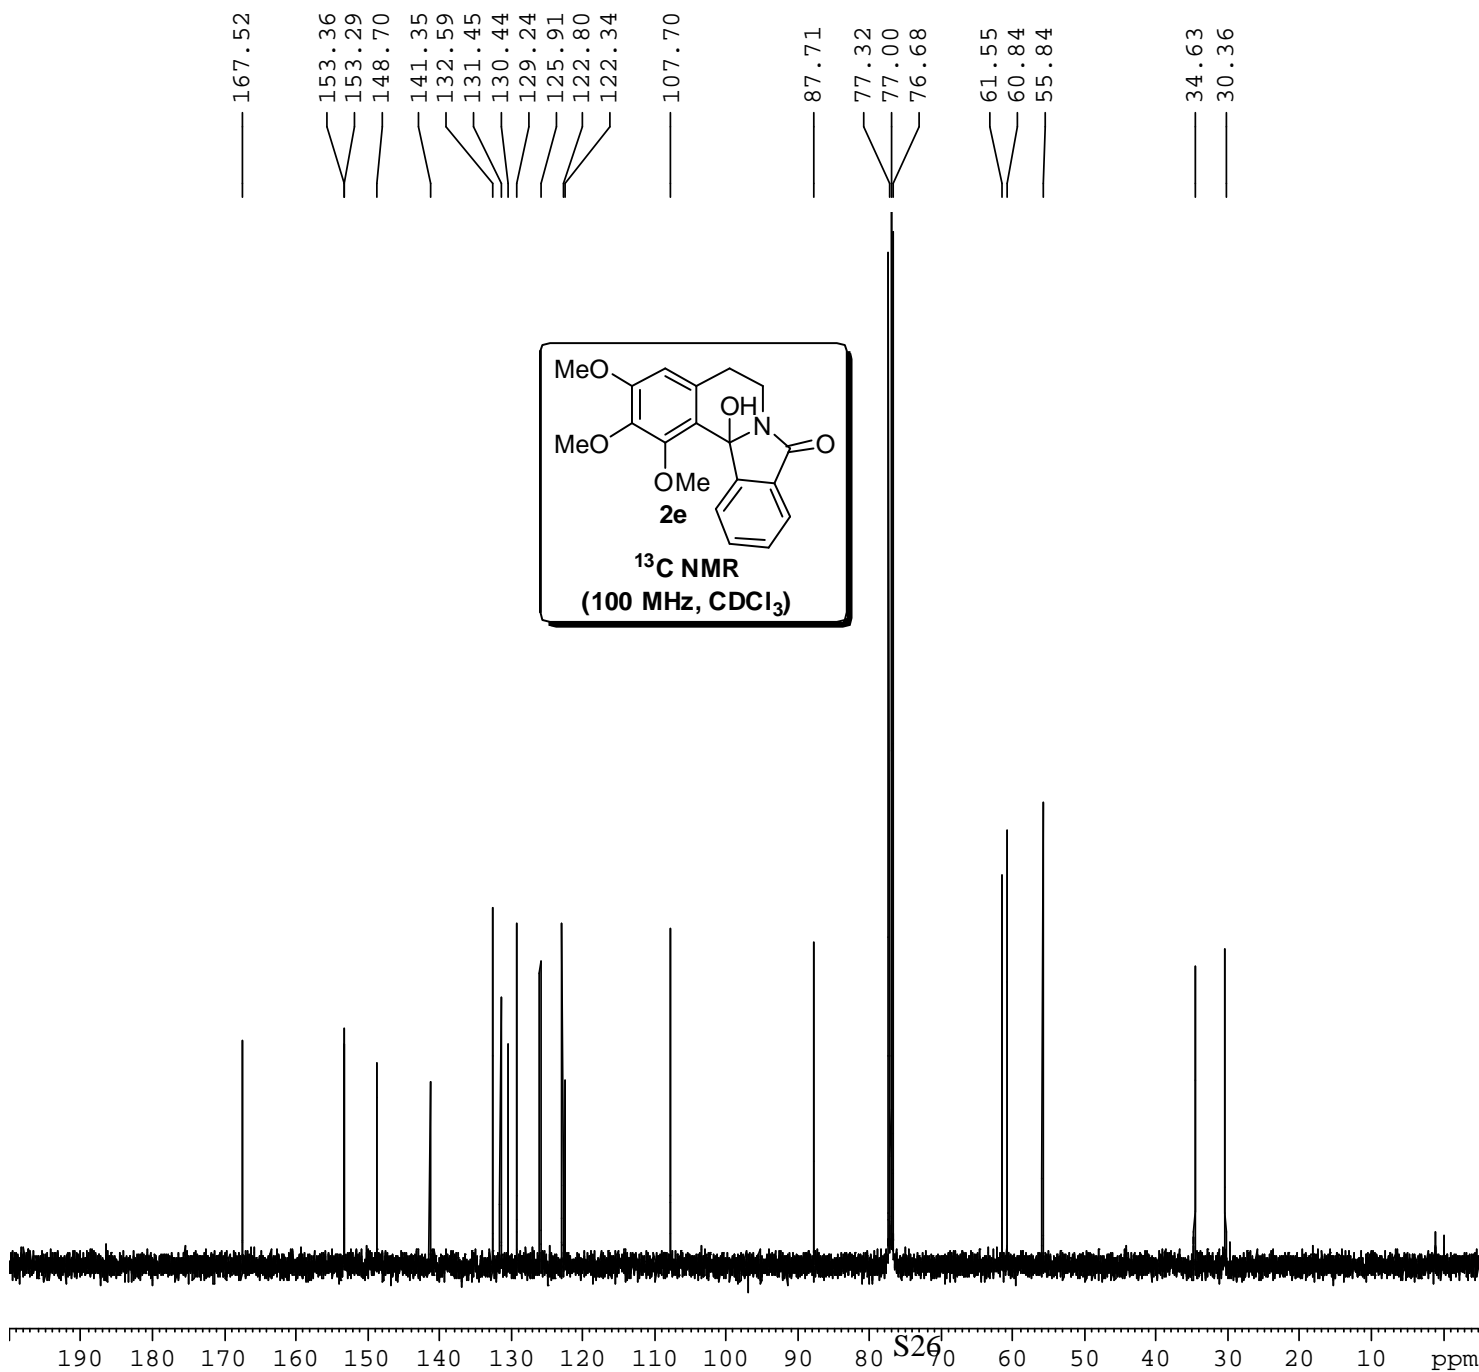

Current Data Parameters  
NAME CRR-JS-1-93-2  
EXPNO 2  
PROCNO 1

F2 - Acquisition Parameters  
Date\_ 20080720  
Time 23.48  
INSTRUM spect  
PROBHD 5 mm BBO BB-1H  
PULPROG zgpg30  
TD 65536  
SOLVENT CDCl3  
NS 256  
DS 4  
SWH 24038.461 Hz  
FIDRES 0.366798 Hz  
AQ 1.3631988 sec  
RG 645  
DW 20.800 usec  
DE 6.00 usec  
TE 295.7 K  
D1 2.00000000 sec  
d11 0.03000000 sec  
DELTA 1.89999998 sec  
TD0 1

==== CHANNEL f1 =====  
NUC1 13C  
P1 9.50 usec  
PL1 -0.60 dB  
SFO1 100.6228298 MHz

==== CHANNEL f2 =====  
CPDPRG2 waltz16  
NUC2 1H  
PCPD2 90.00 usec  
PL12 15.60 dB  
PL13 15.60 dB  
PL2 -0.90 dB  
SFO2 400.1316005 MHz

F2 - Processing parameters  
SI 32768  
SF 100.6127728 MHz  
WDW EM  
SSB 0  
LB 1.00 Hz  
GB 0  
PC 1.40

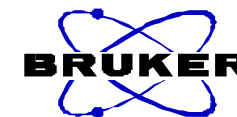

Current Data Parameters  
NAME JS-III-233-1  
EXPNO 1  
PROCNO 1

F2 - Acquisition Parameters  
Date\_ 20100927  
Time 10.16  
INSTRUM spect  
PROBHD 5 mm BBO BB-1H  
PULPROG zg30  
TD 65536  
SOLVENT CDCl3  
NS 16  
DS 2  
SWH 8223.685 Hz  
FIDRES 0.125483 Hz  
AQ 3.9846387 sec  
RG 406  
DW 60.800 usec  
DE 6.00 usec  
TE 297.7 K  
D1 1.00000000 sec  
TD0 1

==== CHANNEL f1 =====  
NUC1 1H  
P1 14.00 usec  
PL1 -0.90 dB  
SFO1 400.1324710 MHz

F2 - Processing parameters  
SI 32768  
SF 400.1300035 MHz  
WDW EM  
SSB 0  
LB 0.30 Hz  
GB 0  
PC 1.00

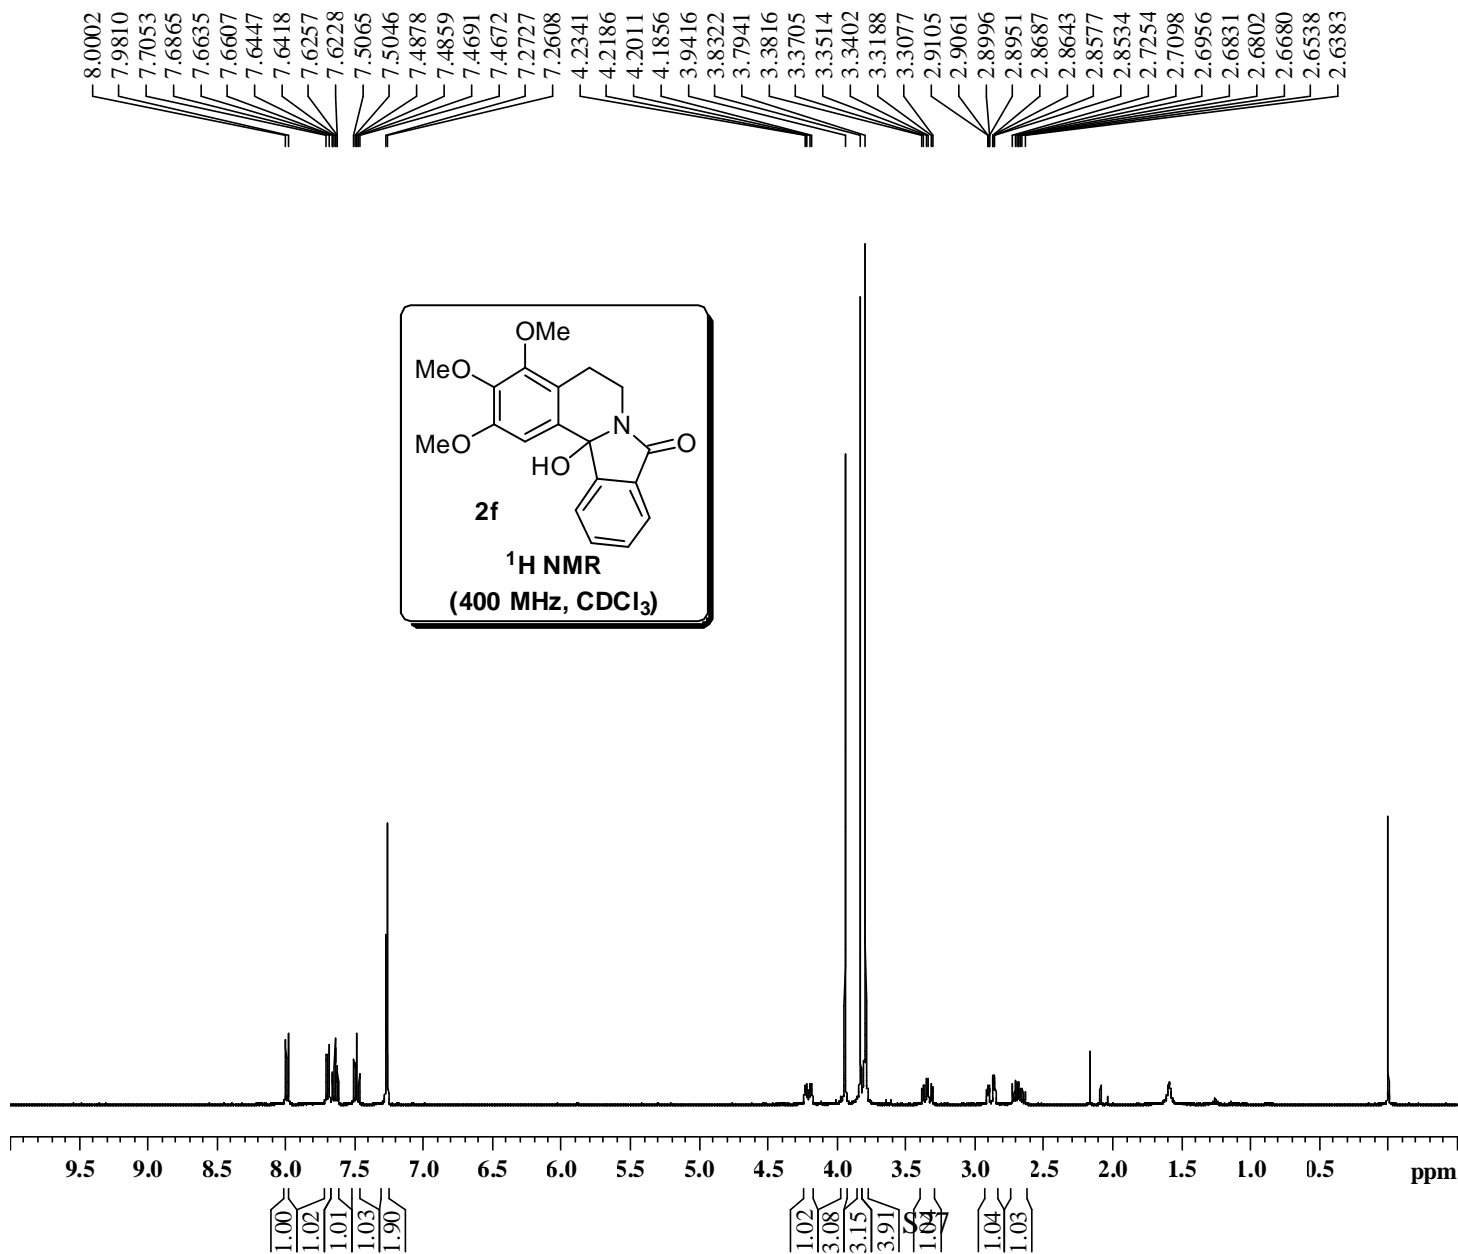

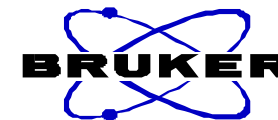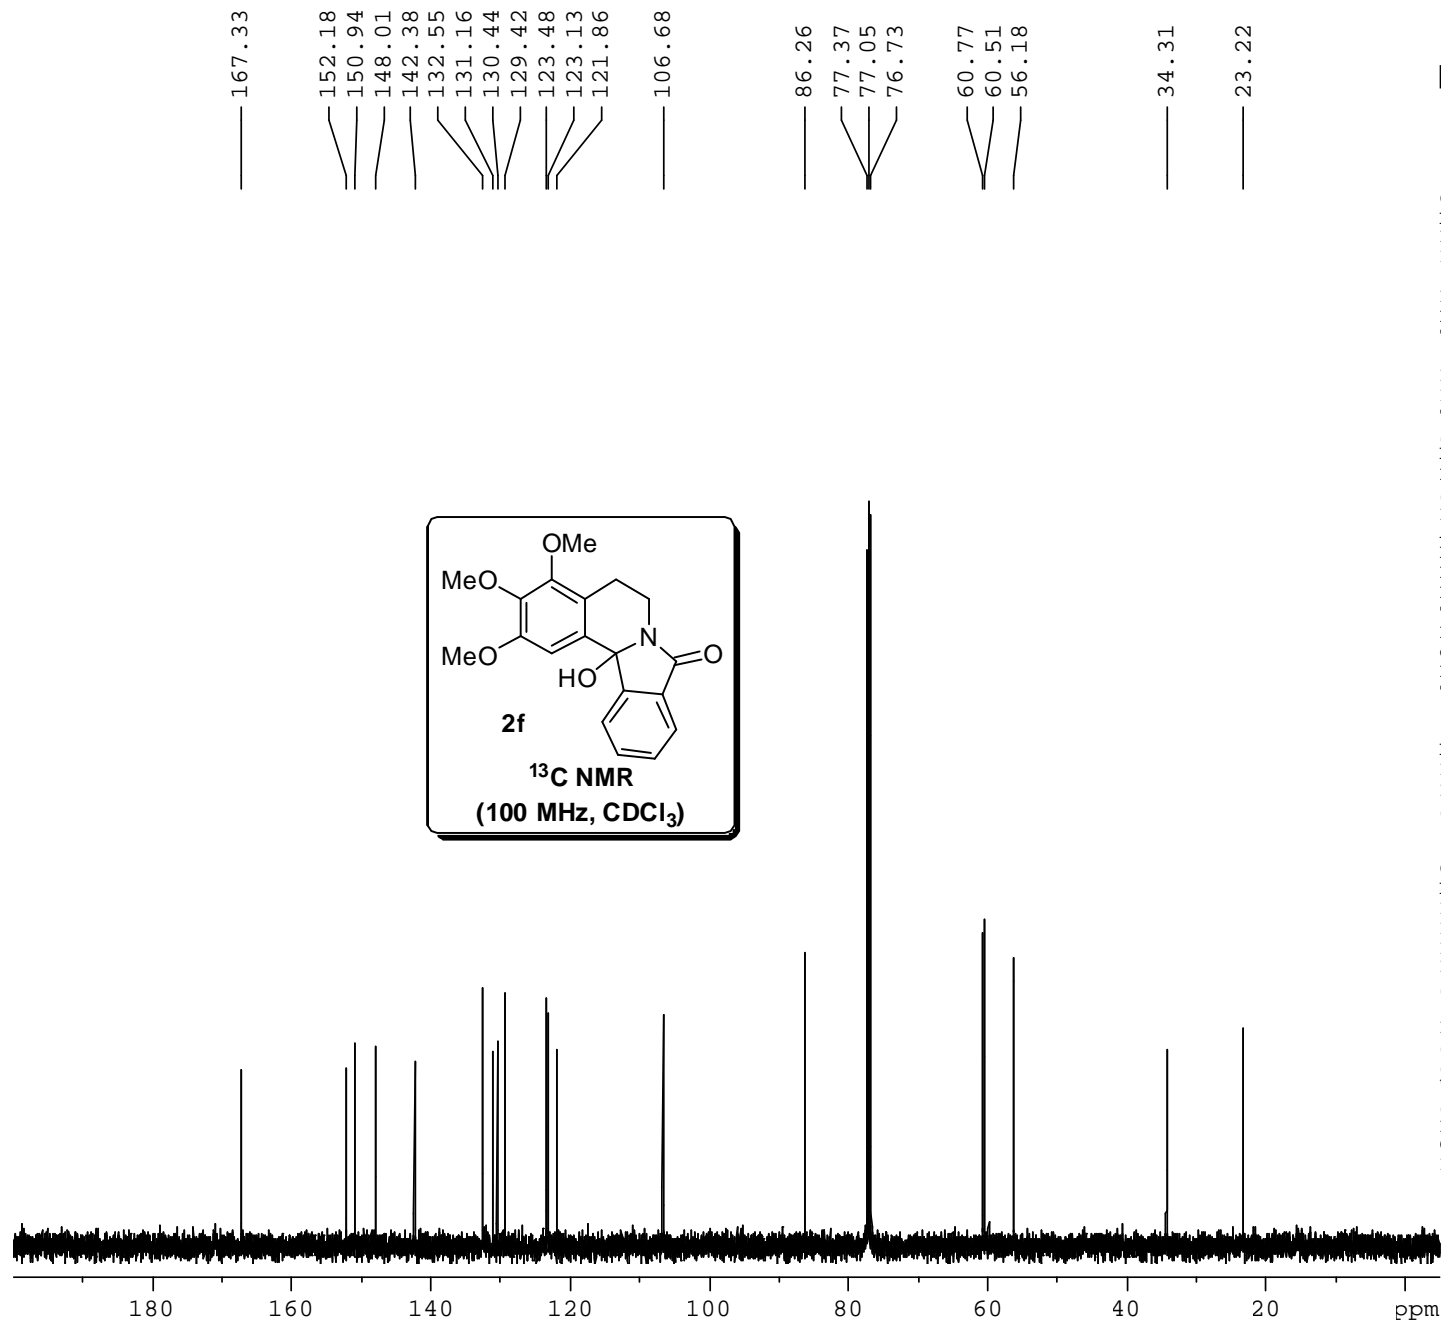

Current Data Parameters  
NAME JS-III-233-1  
EXPNO 2  
PROCNO 1

F2 - Acquisition Parameters  
Date\_ 20100927  
Time 13.11  
INSTRUM spect  
PROBHD 5 mm BBO BB-1H  
PULPROG zgpg30  
TD 65536  
SOLVENT CDCl3  
NS 77  
DS 4  
SWH 24038.461 Hz  
FIDRES 0.366798 Hz  
AQ 1.3631988 sec  
RG 57  
DW 20.800 usec  
DE 6.00 usec  
TE 299.5 K  
D1 2.00000000 sec  
d11 0.03000000 sec  
DELTA 1.89999998 sec  
TD0 1

==== CHANNEL f1 =====  
NUC1 13C  
P1 9.50 usec  
PL1 -0.60 dB  
SFO1 100.6228298 MHz

==== CHANNEL f2 =====  
CPDPRG2 waltz16  
NUC2 1H  
PCPD2 90.00 usec  
PL12 15.60 dB  
PL13 15.60 dB  
PL2 -0.90 dB  
SFO2 400.1316005 MHz

F2 - Processing parameters  
SI 32768  
SF 100.6127690 MHz  
WDW EM  
SSB 0  
LB 1.00 Hz  
GB 0  
PC 1.40

7.9784  
7.9592  
7.7072  
7.6885  
7.6532  
7.6503  
7.6343  
7.6314  
7.6154  
7.6125  
7.4988  
7.4967  
7.4801  
7.4781  
7.4614  
7.4594  
7.3906  
7.2608  
6.5657  
5.9511  
5.9477  
5.9027  
5.8993  
4.2111  
4.2058  
4.1961  
4.1908  
4.1784  
4.1731  
4.1633  
4.1580  
3.6303  
3.4341  
3.4231  
3.4047  
3.4014  
3.3938  
3.3905  
3.3720  
3.3611  
2.9224  
2.8950  
2.8819  
2.8679  
2.8664  
2.8525  
2.7245  
2.7193  
2.7139  
2.7085  
2.6842  
2.6789  
2.6734  
2.6682

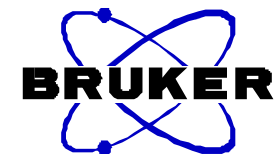

Current Data Parameters  
NAME JS-III-249-1  
EXPNO 6  
PROCNO 1

F2 - Acquisition Parameters  
Date\_ 20110205  
Time 11.02  
INSTRUM spect  
PROBHD 5 mm BBO BB-1H  
PULPROG zg30  
TD 65536  
SOLVENT CDCl3  
NS 16  
DS 2  
SWH 8223.685 Hz  
FIDRES 0.125483 Hz  
AQ 3.9846387 sec  
RG 512  
DW 60.800 usec  
DE 6.00 usec  
TE 296.4 K  
D1 1.00000000 sec  
TD0 1

==== CHANNEL f1 =====  
NUC1 1H  
P1 14.00 usec  
PL1 -0.90 dB  
SFO1 400.1324710 MHz

F2 - Processing parameters  
SI 32768  
SF 400.1300036 MHz  
WDW EM  
SSB 0  
LB 0.30 Hz  
GB 0  
PC 1.00

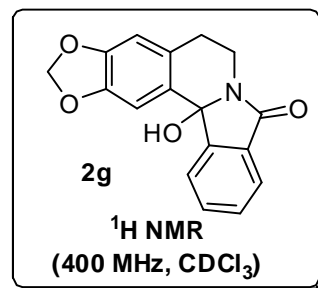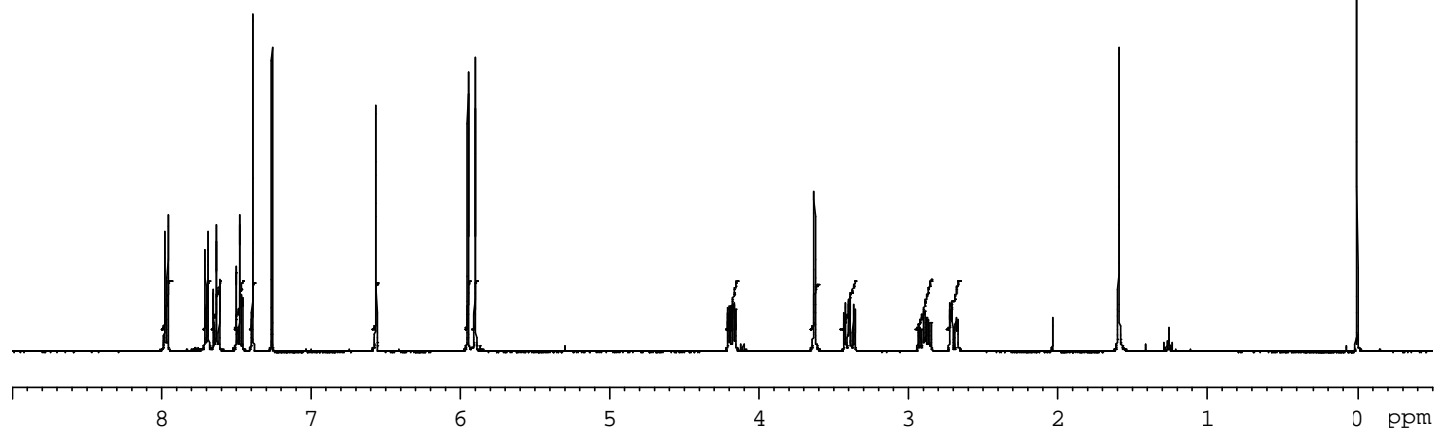

1.00  
1.00  
1.00  
1.01  
0.96  
0.96  
0.99  
0.99  
1.00  
0.92  
1.02  
1.02  
1.01

S29

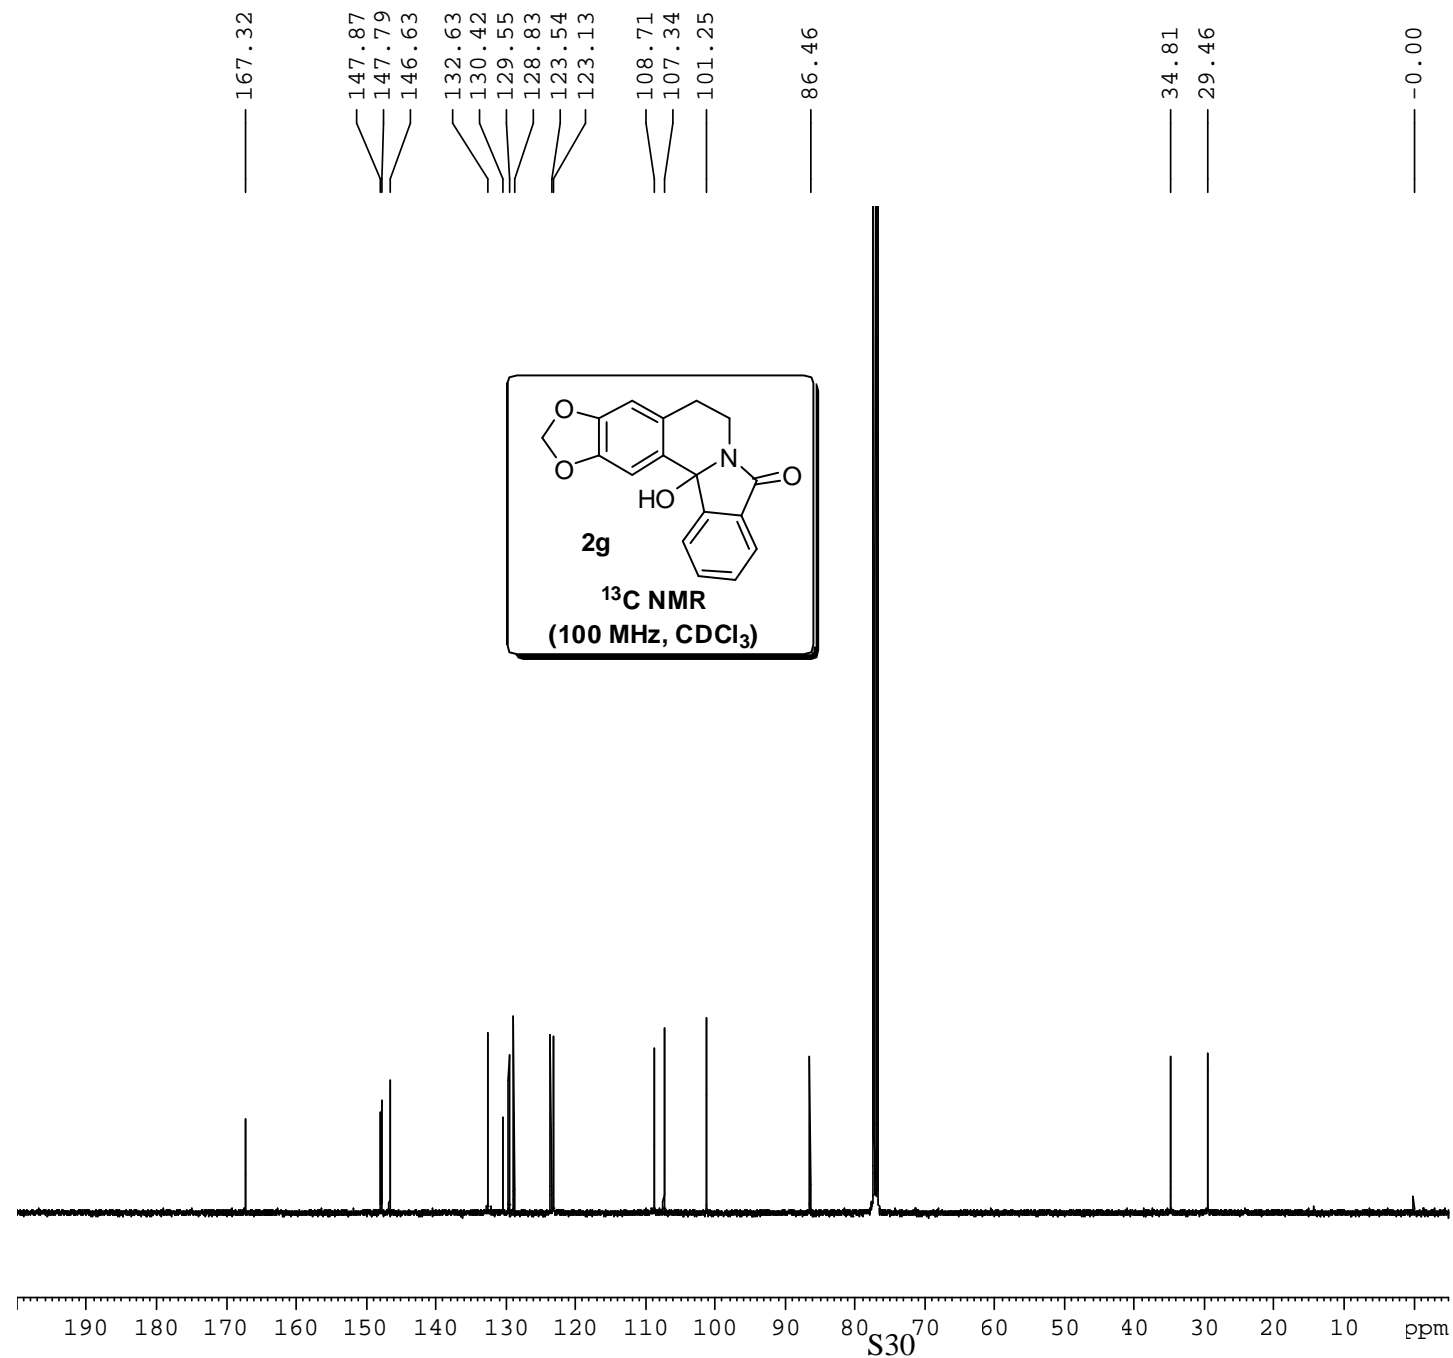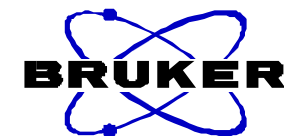

Current Data Parameters  
NAME JS-II-249-1b  
EXPNO 1  
PROCNO 1

F2 - Acquisition Parameters  
Date\_ 20110205  
Time 21.11  
INSTRUM spect  
PROBHD 5 mm BBO BB-1H  
PULPROG zgpg30  
TD 65536  
SOLVENT CDCl3  
NS 8000  
DS 4  
SWH 24038.461 Hz  
FIDRES 0.366798 Hz  
AQ 1.3631988 sec  
RG 57  
DW 20.800 usec  
DE 6.00 usec  
TE 297.2 K  
D1 2.00000000 sec  
d11 0.03000000 sec  
DELTA 1.89999998 sec  
TD0 1

==== CHANNEL f1 =====  
NUC1 13C  
P1 9.50 usec  
PL1 -0.60 dB  
SFO1 100.6228298 MHz

==== CHANNEL f2 =====  
CPDPRG2 waltz16  
NUC2 1H  
PCPD2 90.00 usec  
PL12 15.60 dB  
PL13 15.60 dB  
PL2 -0.90 dB  
SFO2 400.1316005 MHz

F2 - Processing parameters  
SI 32768  
SF 100.6127675 MHz  
WDW EM  
SSB 0  
LB 1.00 Hz  
GB 0  
PC 1.40

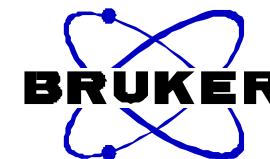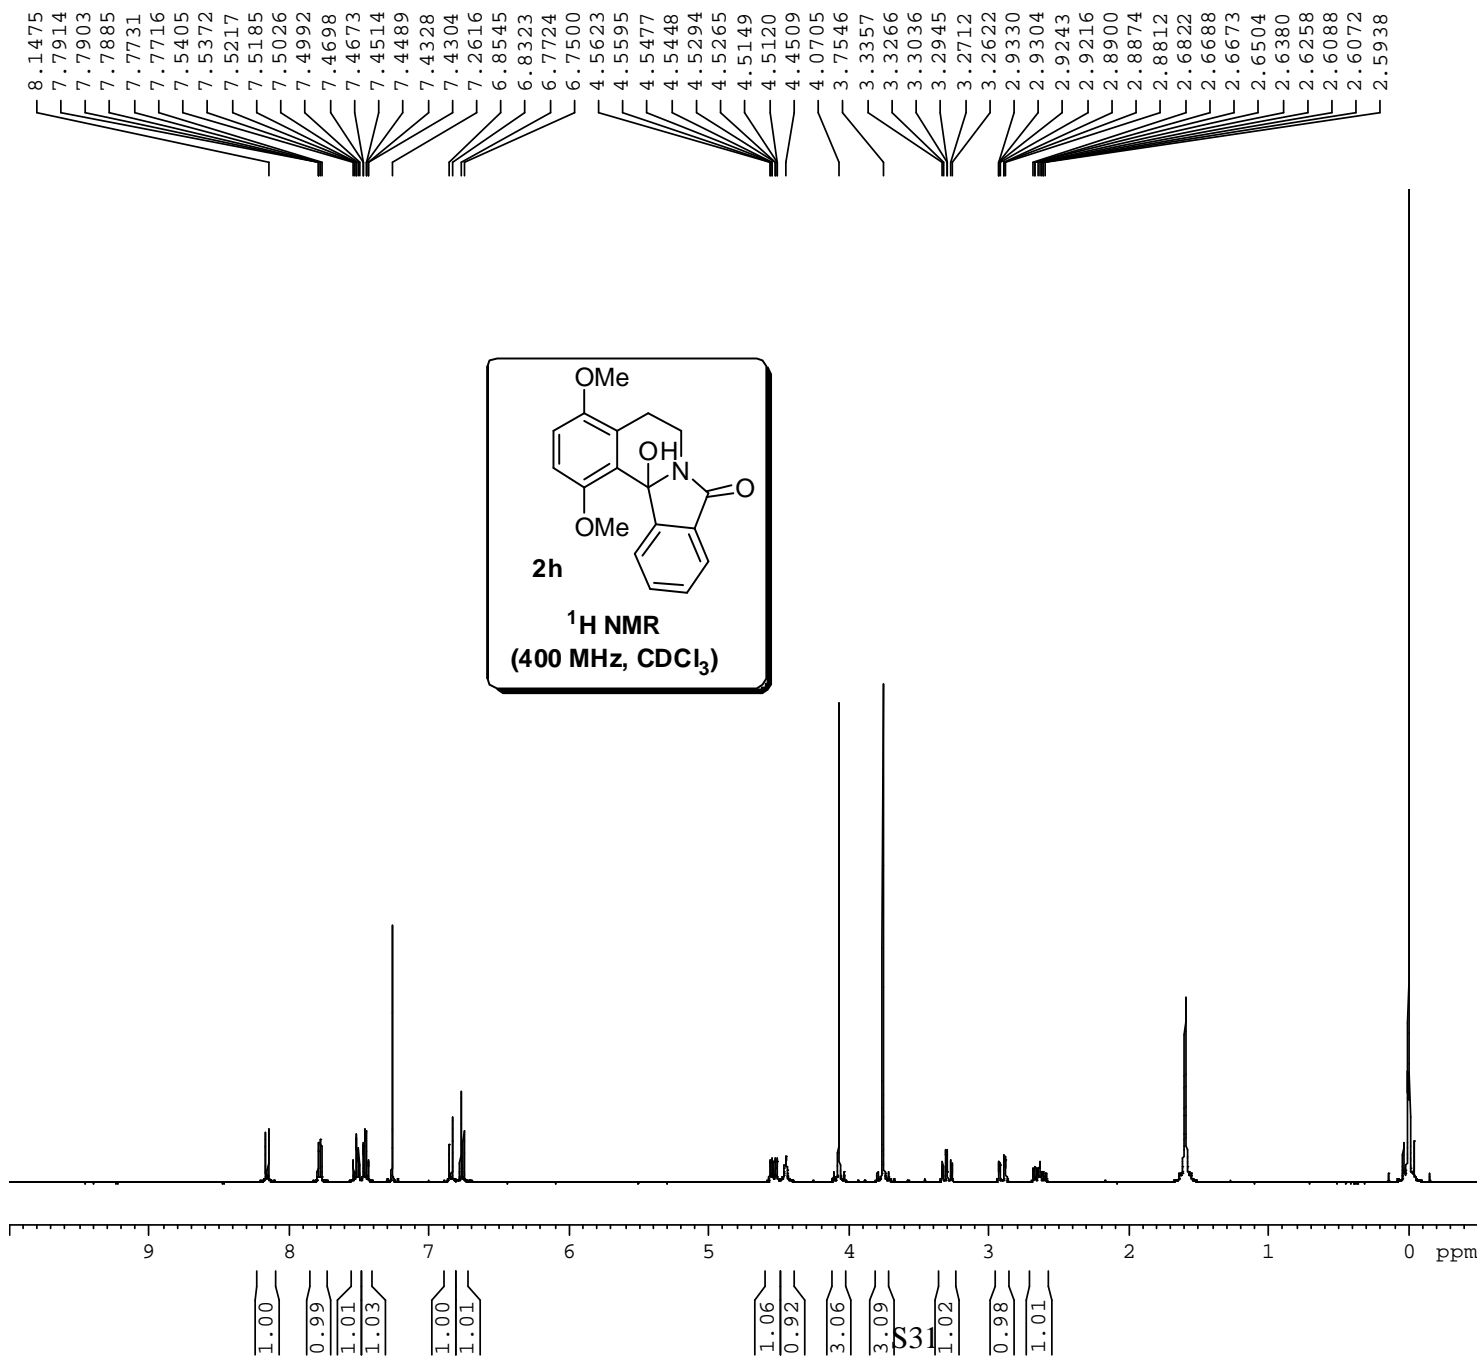

Current Data Parameters

NAME JS-25C-1  
EXPNO 1  
PROCNO 1

F2 - Acquisition Parameters

Date\_ 20110523  
Time 15.50  
INSTRUM spect  
PROBHD 5 mm BBO BB-1H  
PULPROG zg30  
TD 65536  
SOLVENT CDCl3  
NS 27  
DS 2  
SWH 8223.685 Hz  
FIDRES 0.125483 Hz  
AQ 3.9846387 sec  
RG 322  
DW 60.800 usec  
DE 6.00 usec  
TE 294.9 K  
D1 1.0000000 sec  
TD0 1

==== CHANNEL f1 =====  
NUC1 1H  
P1 14.00 usec  
PL1 -0.90 dB  
SFO1 400.1324710 MHz

F2 - Processing parameters  
SI 32768  
SF 400.1300032 MHz  
WDW EM  
SSB 0  
LB 0.30 Hz  
GB 0  
PC 1.00

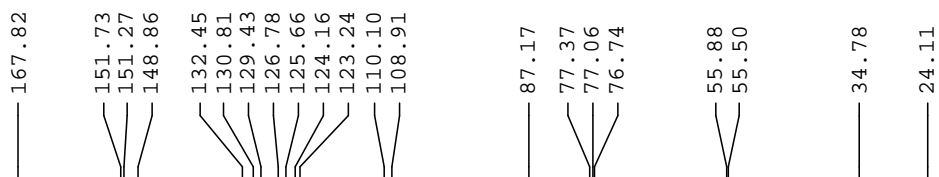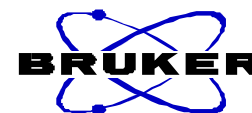

Current Data Parameters  
NAME JS-III-208-1  
EXPNO 3  
PROCNO 1

F2 - Acquisition Parameters  
Date\_ 20100825  
Time 16.30  
INSTRUM spect  
PROBHD 5 mm BBO BB-1H  
PULPROG zgpg30  
TD 65536  
SOLVENT CDC13  
NS 208  
DS 4  
SWH 24038.461 Hz  
FIDRES 0.366798 Hz  
AQ 1.3631988 sec  
RG 50.8  
DW 20.800 usec  
DE 6.00 usec  
TE 297.3 K  
D1 2.00000000 sec  
d11 0.03000000 sec  
DELTA 1.89999998 sec  
TD0 1

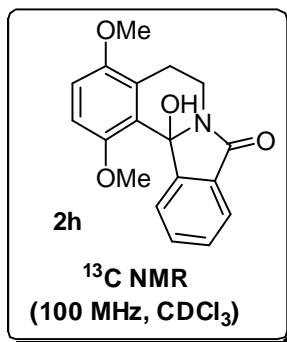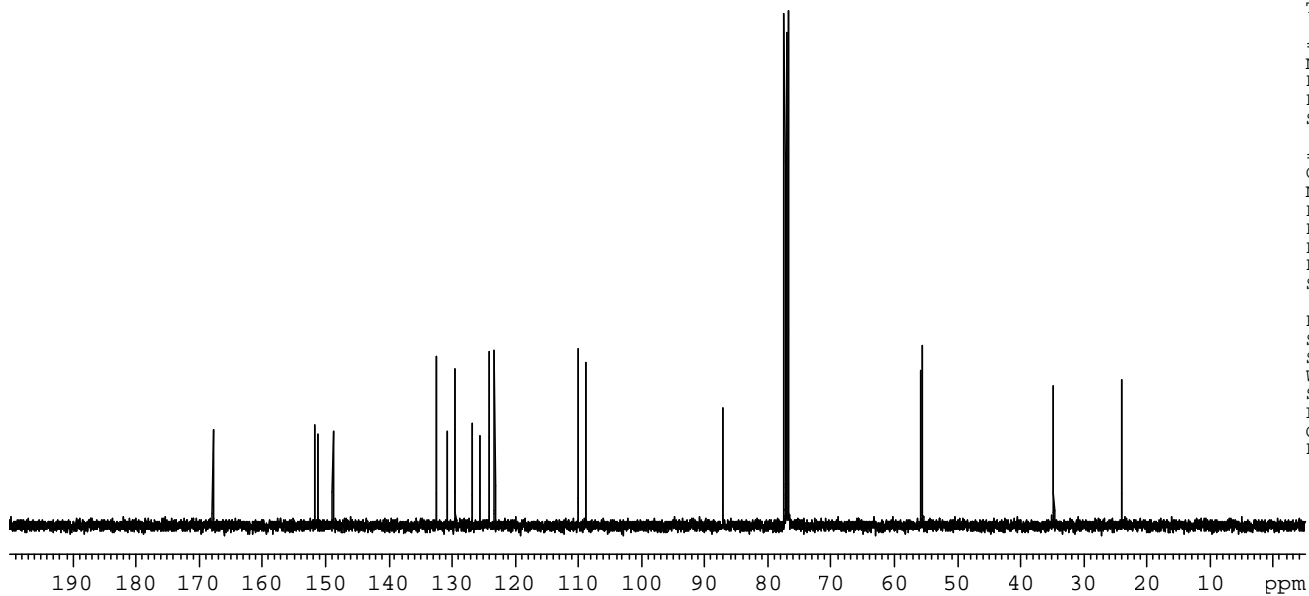

==== CHANNEL f1 =====  
NUC1 13C  
P1 9.50 usec  
PL1 -0.60 dB  
SFO1 100.6228298 MHz

==== CHANNEL f2 =====  
CPDPRG2 waltz16  
NUC2 1H  
PCPD2 90.00 usec  
PL12 15.60 dB  
PL13 15.60 dB  
PL2 -0.90 dB  
SFO2 400.1316005 MHz

F2 - Processing parameters  
SI 32768  
SF 100.6127690 MHz  
WDW EM  
SSB 0  
LB 1.00 Hz  
GB 0  
PC 1.40



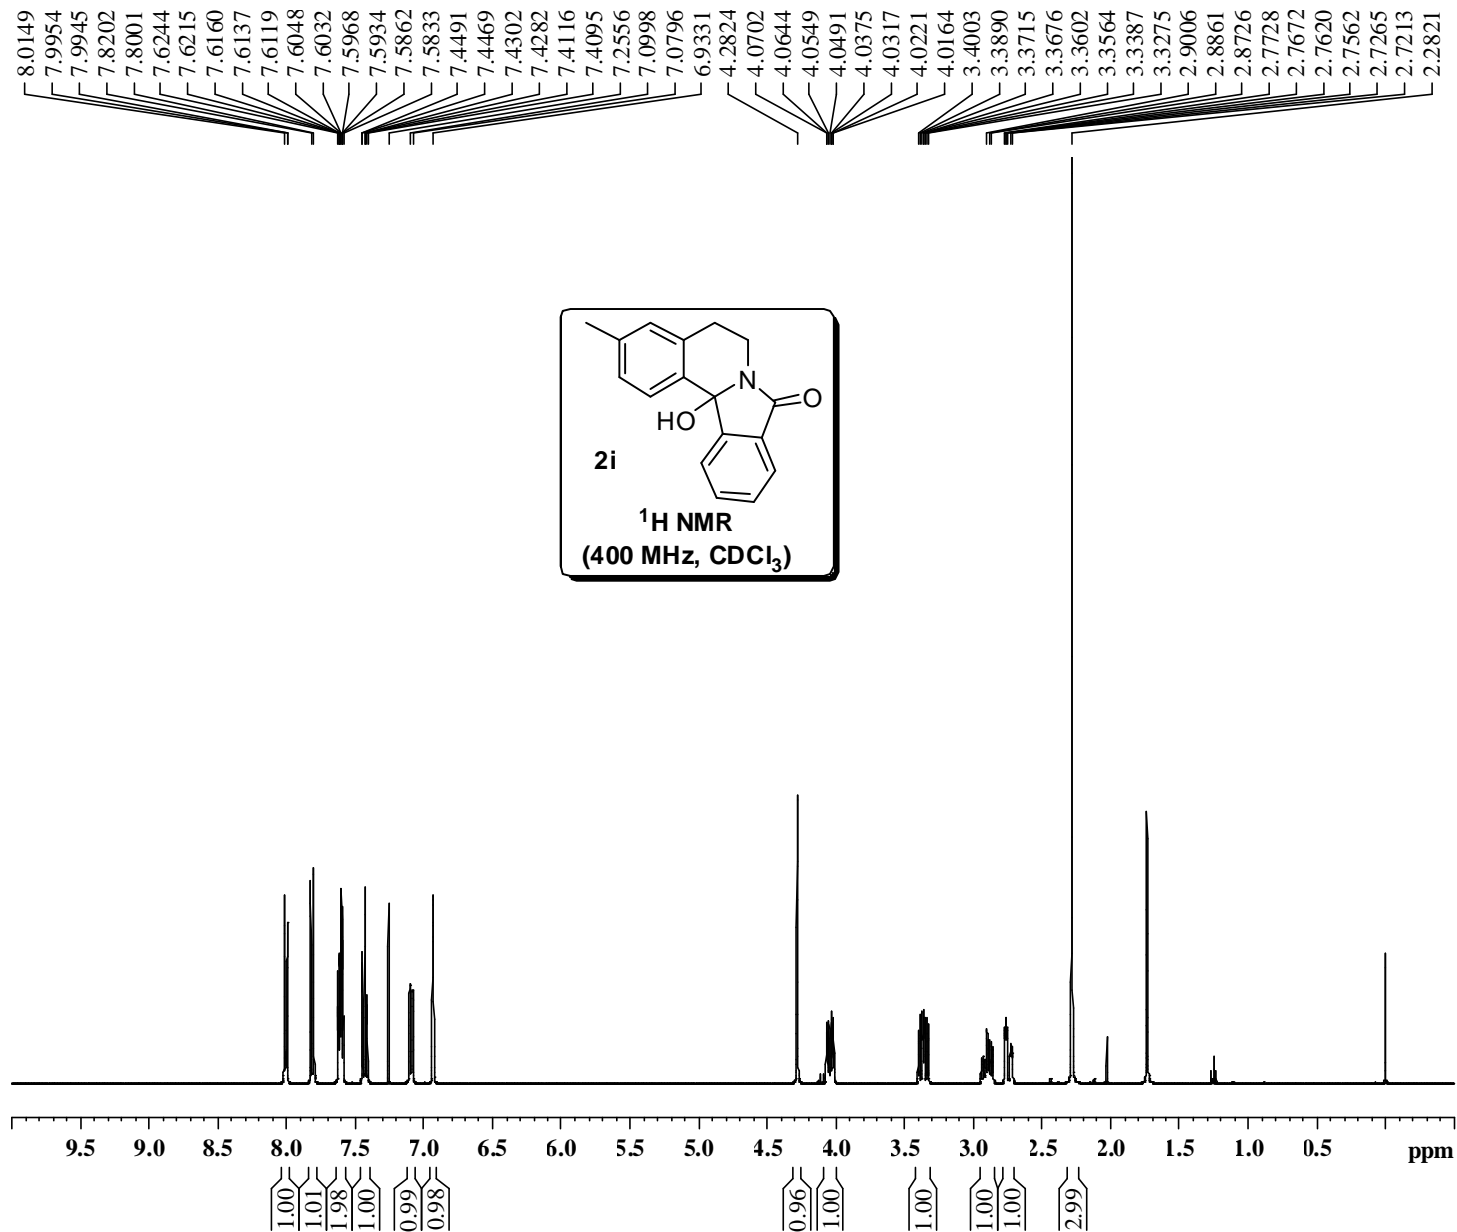

Current Data Parameters  
NAME JS-III-Me-Cy  
EXPNO 4  
PROCNO 1

F2 - Acquisition Parameters  
Date\_ 20101025  
Time 14.51  
INSTRUM spect  
PROBHD 5 mm BBO BB-1H  
PULPROG zg30  
TD 65536  
SOLVENT CDCl3  
NS 16  
DS 2  
SWH 8223.685 Hz  
FIDRES 0.125483 Hz  
AQ 3.9846387 sec  
RG 228  
DW 60.800 usec  
DE 6.00 usec  
TE 297.2 K  
D1 1.00000000 sec  
TD0 1

===== CHANNEL f1 =====  
NUC1 1H  
P1 14.00 usec  
PL1 -0.90 dB  
SFO1 400.1324710 MHz

F2 - Processing parameters  
SI 32768  
SF 400.1300056 MHz  
WDW EM  
SSB 0  
LB 0.30 Hz  
GB 0  
PC 1.00

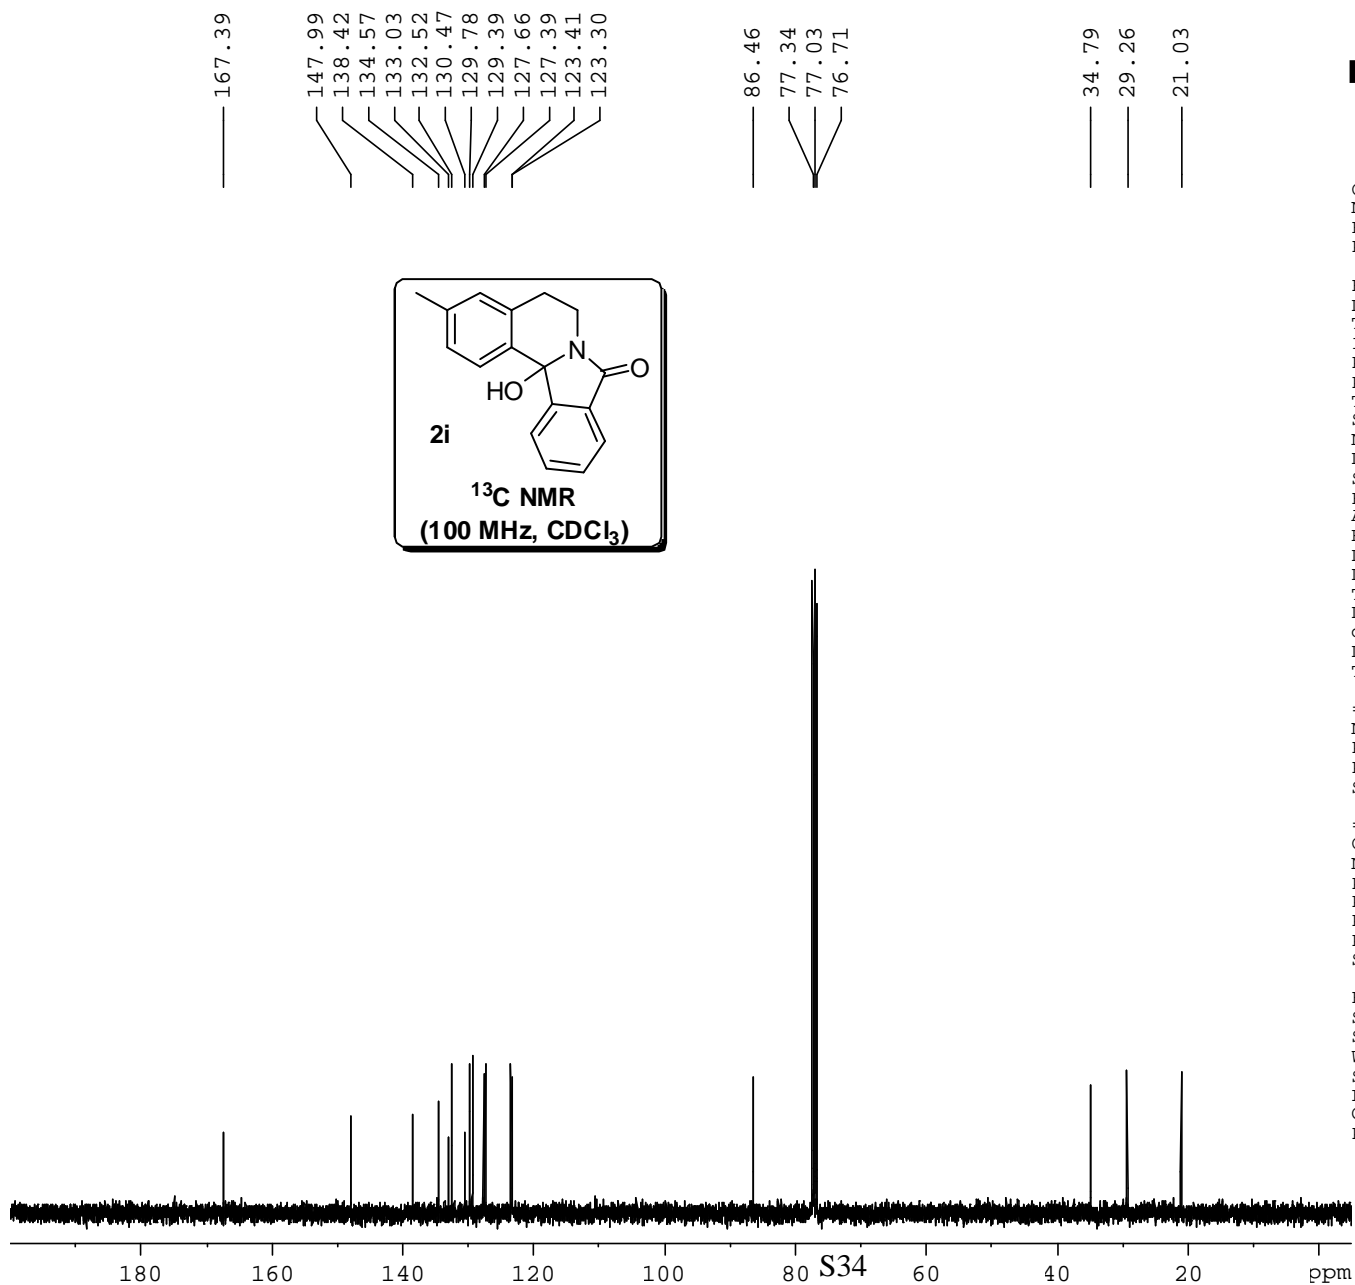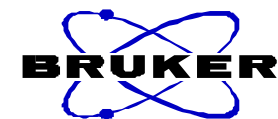

Current Data Parameters  
NAME JS-III-Me-Cy  
EXPNO 2  
PROCNO 1

F2 - Acquisition Parameters  
Date\_ 20101025  
Time 14.46  
INSTRUM spect  
PROBHD 5 mm BBO BB-1H  
PULPROG zgpg30  
TD 65536  
SOLVENT CDCl3  
NS 126  
DS 4  
SWH 24038.461 Hz  
FIDRES 0.366798 Hz  
AQ 1.3631988 sec  
RG 50.8  
DW 20.800 usec  
DE 6.00 usec  
TE 297.7 K  
D1 2.00000000 sec  
d11 0.03000000 sec  
DELTA 1.89999998 sec  
TD0 1

=====  
CHANNEL f1  
NUC1 13C  
P1 9.50 usec  
PL1 -0.60 dB  
SFO1 100.6228298 MHz

=====  
CHANNEL f2  
CPDPRG2 waltz16  
NUC2 1H  
PCPD2 90.00 usec  
PL12 15.60 dB  
PL13 15.60 dB  
PL2 -0.90 dB  
SFO2 400.1316005 MHz

F2 - Processing parameters  
SI 32768  
SF 100.6127690 MHz  
WDW EM  
SSB 0  
LB 1.00 Hz  
GB 0  
PC 1.40

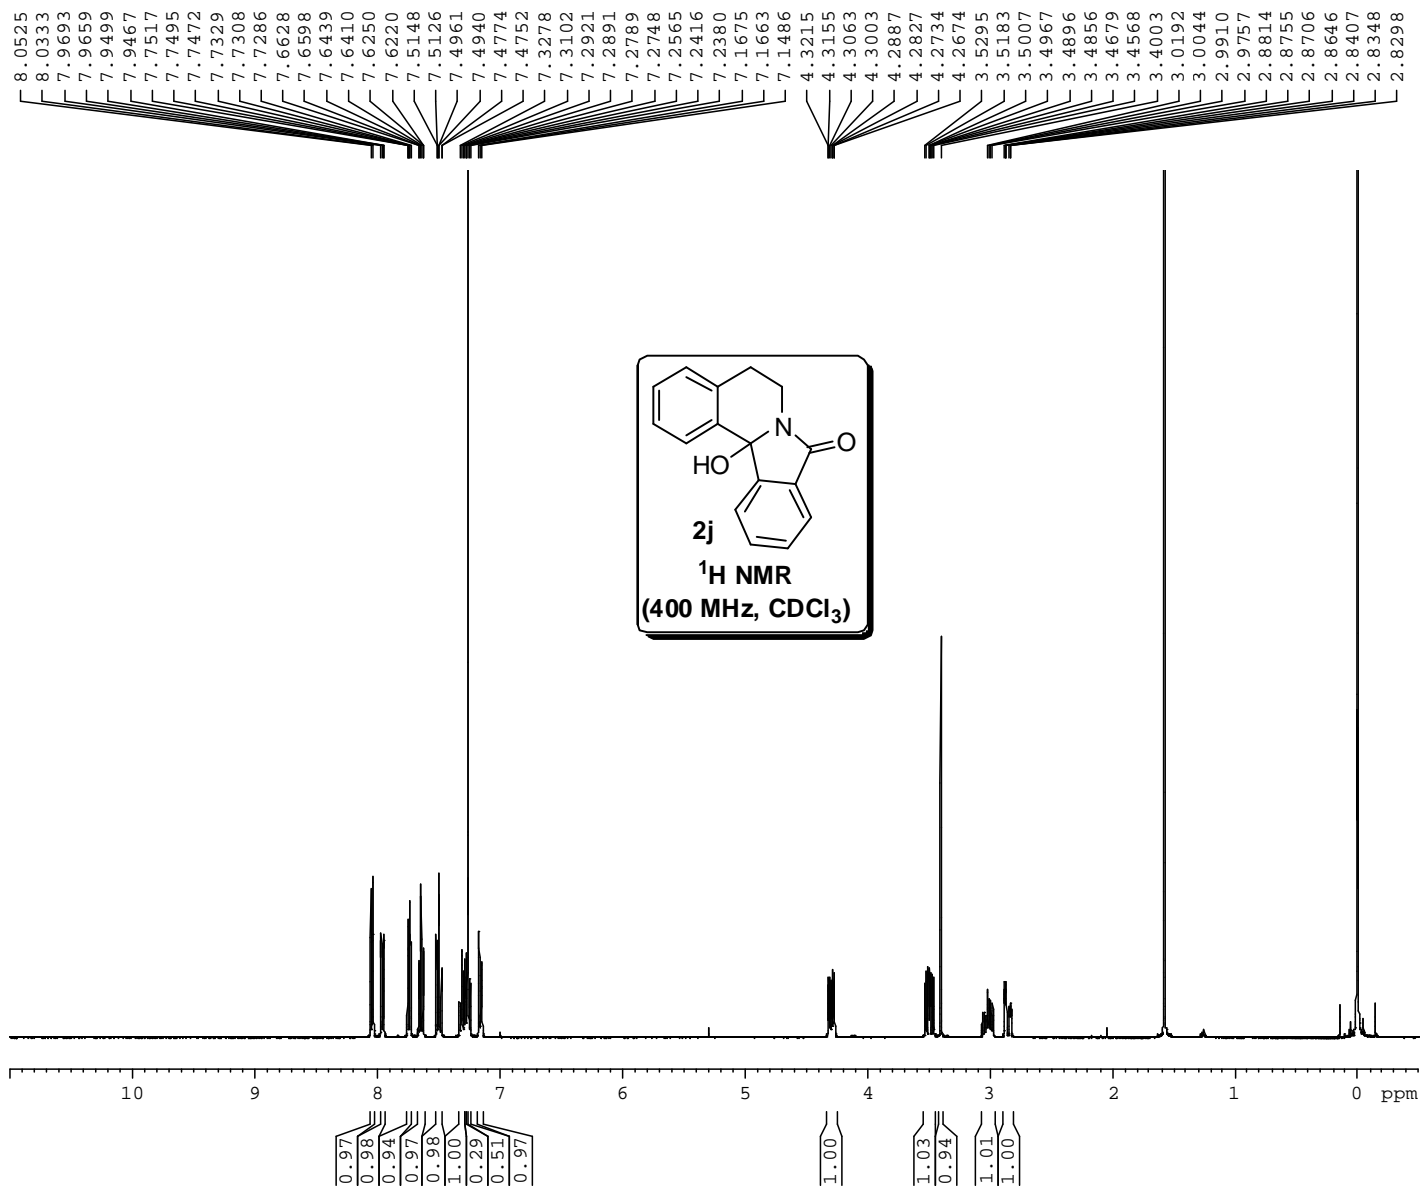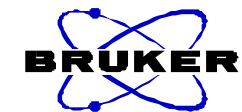

Current Data Parameters  
NAME JS-un-Cy-1  
EXPNO 1  
PROCNO 1

F2 - Acquisition Parameters  
Date\_ 20110516  
Time 12.53  
INSTRUM spect  
PROBHD 5 mm BBO BB-1H  
PULPROG zg30  
TD 65536  
SOLVENT CDCl3  
NS 32  
DS 2  
SWH 8223.685 Hz  
FIDRES 0.125483 Hz  
AQ 3.9846387 sec  
RG 362  
DW 60.800 usec  
DE 6.00 usec  
TE 295.0 K  
D1 1.0000000 sec  
TD0 1

==== CHANNEL f1 =====  
NUC1 1H  
P1 14.00 usec  
PL1 -0.90 dB  
SF01 400.1324710 MHz

F2 - Processing parameters  
SI 32768  
SF 400.1300038 MHz  
WDW EM  
SSB 0  
LB 0.30 Hz  
GB 0  
PC 1.00

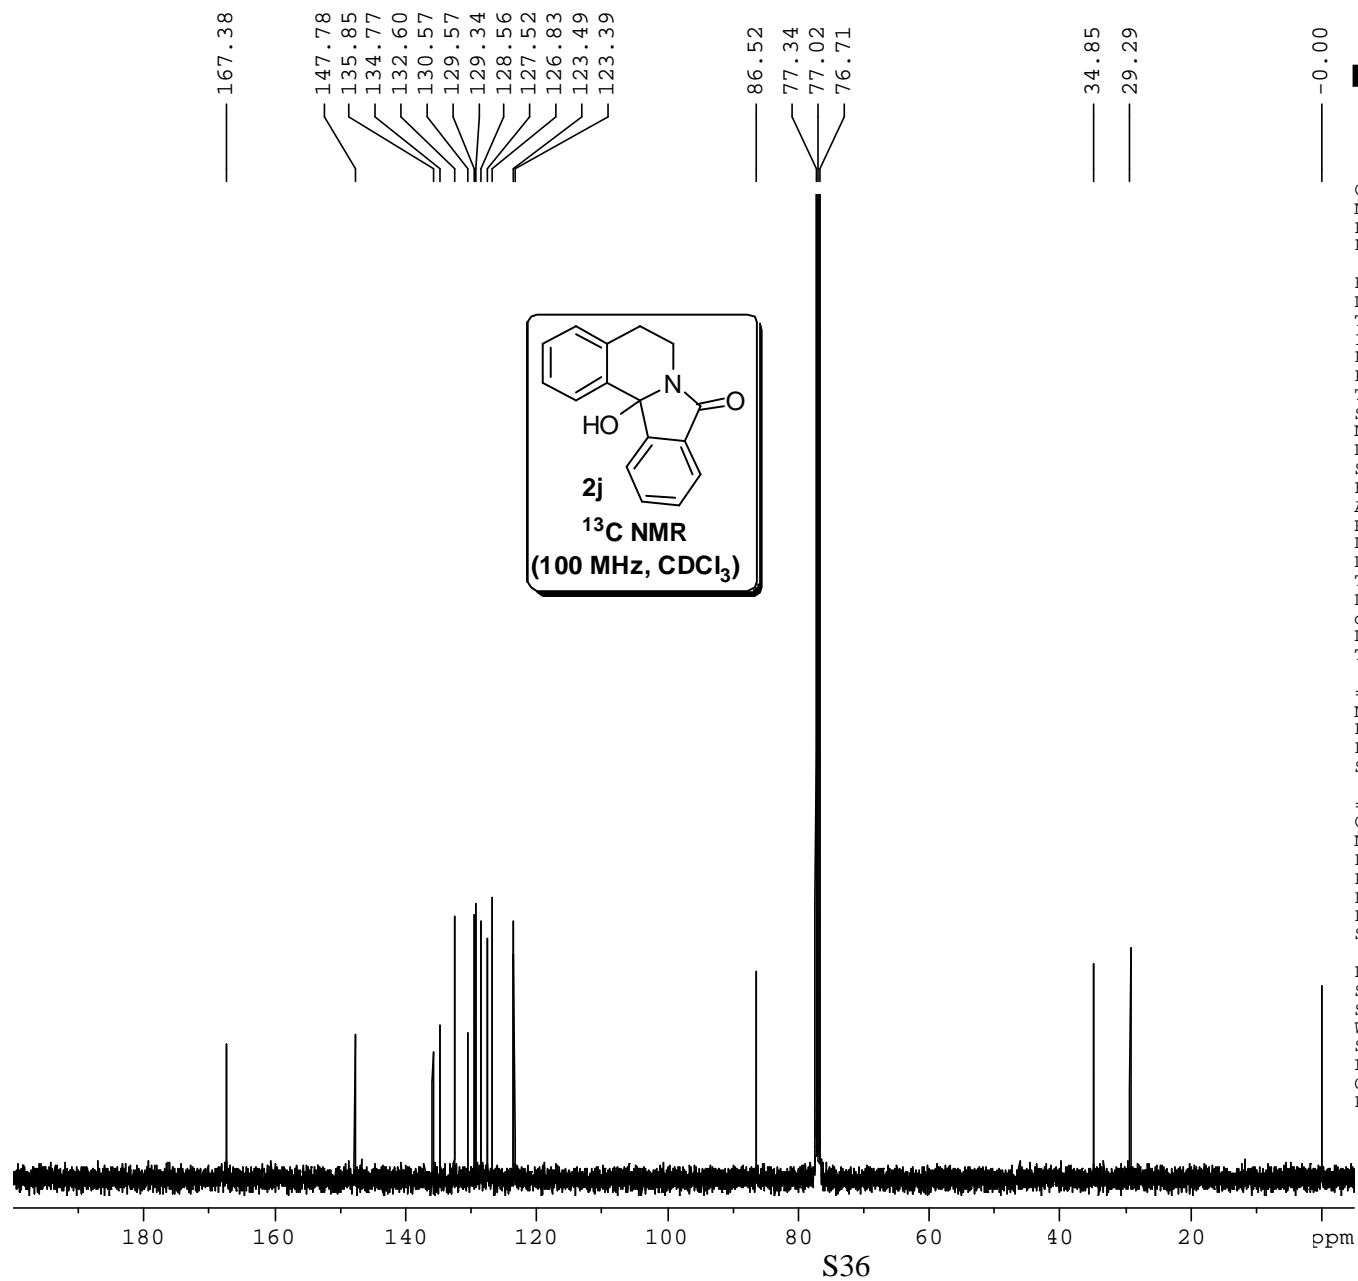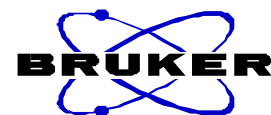

Current Data Parameters  
NAME JS-UNC-1  
EXPNO 1  
PROCNO 1

F2 - Acquisition Parameters  
Date\_ 20110526  
Time 12.23  
INSTRUM spect  
PROBHD 5 mm BBO BB-1H  
PULPROG zgpg30  
TD 65536  
SOLVENT CDCl3  
NS 572  
DS 4  
SWH 24038.461 Hz  
FIDRES 0.366798 Hz  
AQ 1.3631988 sec  
RG 1030  
DW 20.800 usec  
DE 6.00 usec  
TE 296.5 K  
D1 2.00000000 sec  
d11 0.03000000 sec  
DELTA 1.89999998 sec  
TD0 1

==== CHANNEL f1 =====  
NUC1 13C  
P1 9.50 usec  
PL1 -0.60 dB  
SFO1 100.6228298 MHz

==== CHANNEL f2 =====  
CPDPRG2 waltz16  
NUC2 1H  
PCPD2 90.00 usec  
PL12 15.60 dB  
PL13 15.60 dB  
PL2 -0.90 dB  
SFO2 400.1316005 MHz

F2 - Processing parameters  
SI 32768  
SF 100.6127680 MHz  
WDW EM  
SSB 0  
LB 1.00 Hz  
GB 0  
PC 1.40

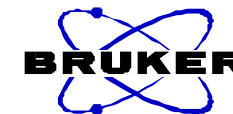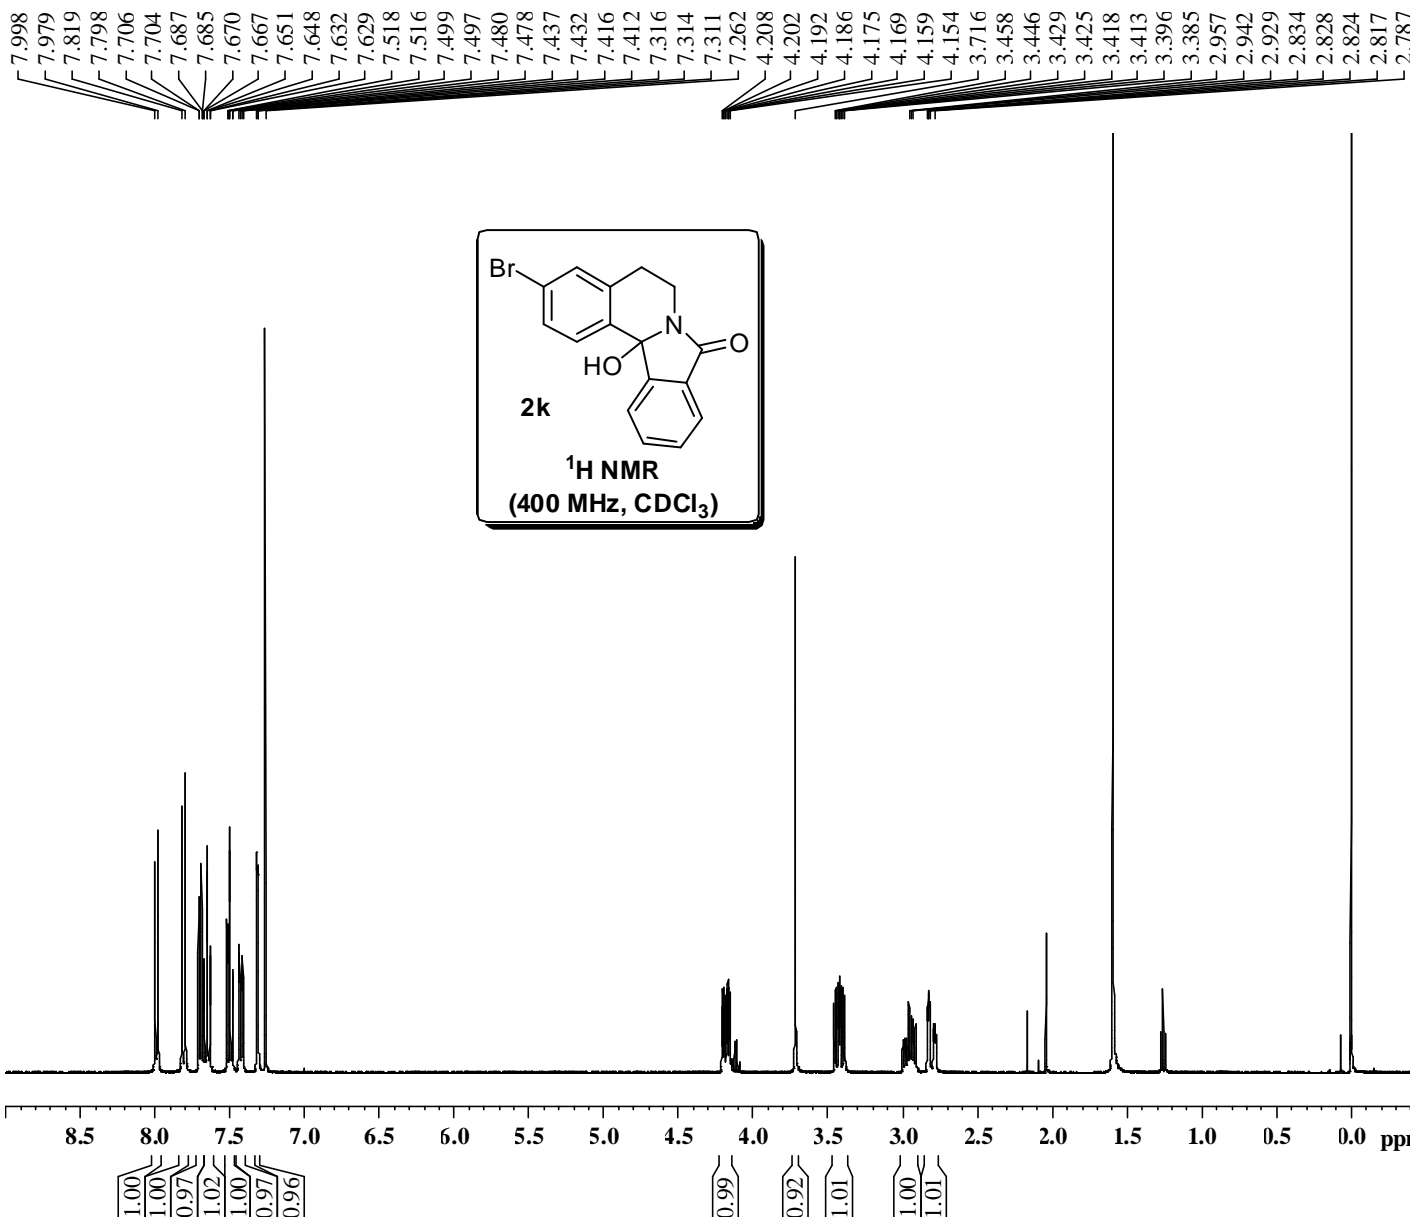

Current Data Parameters  
NAME JS-III-262-2  
EXPNO 1  
PROCNO 1

F2 - Acquisition Parameters  
Date\_ 20101214  
Time 21.50  
INSTRUM spect  
PROBHD 5 mm BBO BB-1H  
PULPROG zg30  
TD 65536  
SOLVENT CDCl3  
NS 16  
DS 2  
SWH 8223.685 Hz  
FIDRES 0.125483 Hz  
AQ 3.9846387 sec  
RG 575  
DW 60.800 usec  
DE 6.00 usec  
TE 295.3 K  
D1 1.00000000 sec  
TD0 1

=====  
CHANNEL f1  
NUC1 1H  
P1 14.00 usec  
PL1 -0.90 dB  
SFO1 400.1324710 MHz

F2 - Processing parameters  
SI 32768  
SF 400.1300033 MHz  
WDW EM  
SSB 0  
LB 0.30 Hz  
GB 0  
PC 1.00

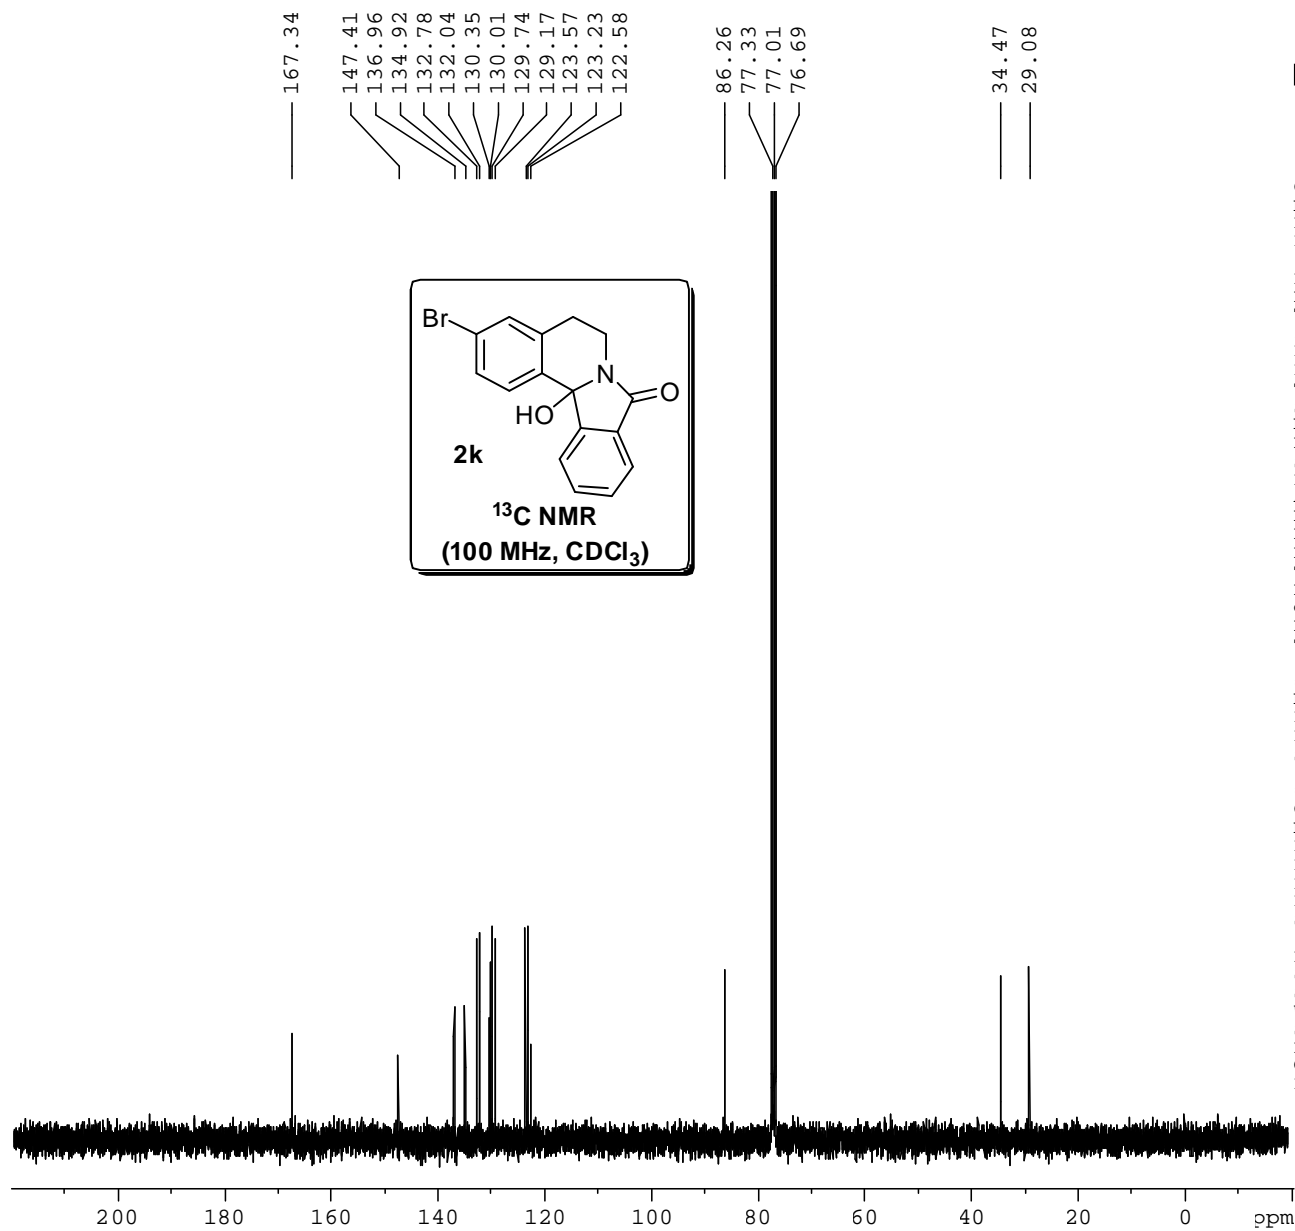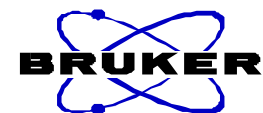

Current Data Parameters  
NAME JS-III-262-2a  
EXPNO 1  
PROCNO 1

F2 - Acquisition Parameters  
Date\_ 20101223  
Time 16.40  
INSTRUM spect  
PROBHD 5 mm BBO BB-1H  
PULPROG zgpg30  
TD 65536  
SOLVENT CDCl3  
NS 150  
DS 4  
SWH 24038.461 Hz  
FIDRES 0.366798 Hz  
AQ 1.3631988 sec  
RG 912  
DW 20.800 usec  
DE 6.00 usec  
TE 297.6 K  
D1 2.00000000 sec  
d11 0.03000000 sec  
DELTA 1.89999998 sec  
TD0 1

=====  
===== CHANNEL f1 =====  
NUC1 13C  
P1 9.50 usec  
PL1 -0.60 dB  
SFO1 100.6228298 MHz

=====  
===== CHANNEL f2 =====  
CPDPRG2 waltz16  
NUC2 1H  
PCPD2 90.00 usec  
PL12 15.60 dB  
PL13 15.60 dB  
PL2 -0.90 dB  
SFO2 400.1316005 MHz

F2 - Processing parameters  
SI 32768  
SF 100.6127690 MHz  
WDW EM  
SSB 0  
LB 1.00 Hz  
GB 0  
PC 1.40

PROTON CDC13 {D:\CRR} KOPAL 1

7.8908  
7.8720  
7.8192  
7.8174  
7.8001  
7.7982  
7.6342  
7.6311  
7.6154  
7.6124  
7.5965  
7.5934  
7.5204  
7.5016  
7.4830  
7.2623  
7.0835  
6.6587  
5.9647  
5.9613  
5.8987  
5.8953  
5.5725  
4.4031  
4.3909  
4.3892  
4.3771  
4.3711  
4.3589  
4.3571  
4.3451  
3.4920  
3.4800  
3.4689  
3.4595  
3.4570  
3.4478  
3.4367  
3.4247  
3.0266  
3.0120  
2.9877  
2.9726  
2.9642  
2.9496  
2.8179  
2.8062  
2.7944  
2.7786  
2.7668  
2.7550  
1.6453  
-0.0001

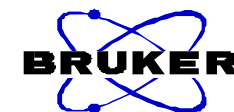

Current Data Parameters  
NAME JS-PiP-ted  
EXPNO 1  
PROCNO 1

F2 - Acquisition Parameters  
Date\_ 20101021  
Time 15.26  
INSTRUM spect  
PROBHD 5 mm BBO BB-1H  
PULPROG zg30  
TD 65536  
SOLVENT CDC13  
NS 16  
DS 2  
SWH 8223.685 Hz  
FIDRES 0.125483 Hz  
AQ 3.9846387 sec  
RG 406  
DW 60.800 usec  
DE 6.00 usec  
TE 296.5 K  
D1 1.00000000 sec  
TD0 1

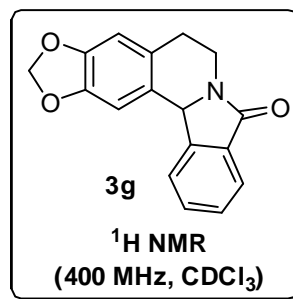

==== CHANNEL f1 =====  
NUC1 1H  
P1 14.00 usec  
PL1 -0.90 dB  
SFO1 400.1324710 MHz

F2 - Processing parameters  
SI 32768  
SF 400.1300029 MHz  
WDW EM  
SSB 0  
LB 0.30 Hz  
GB 0  
PC 1.00

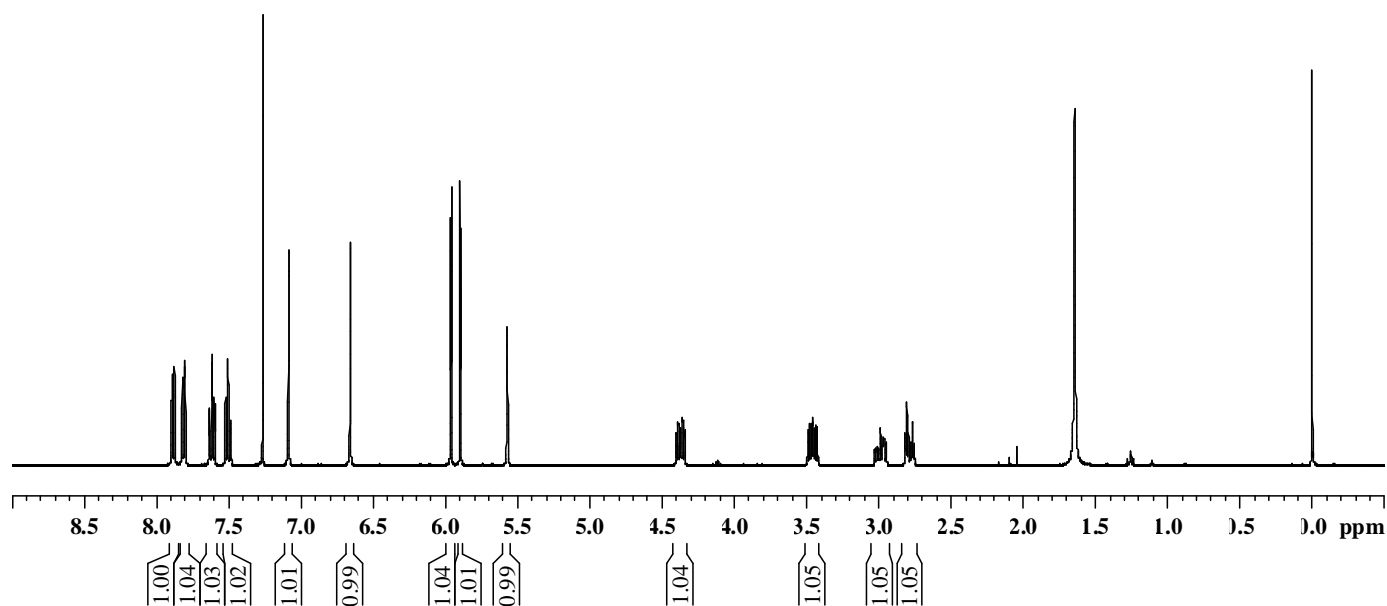

C13CPD CDC13 {D:\CRR} KOPAL 1

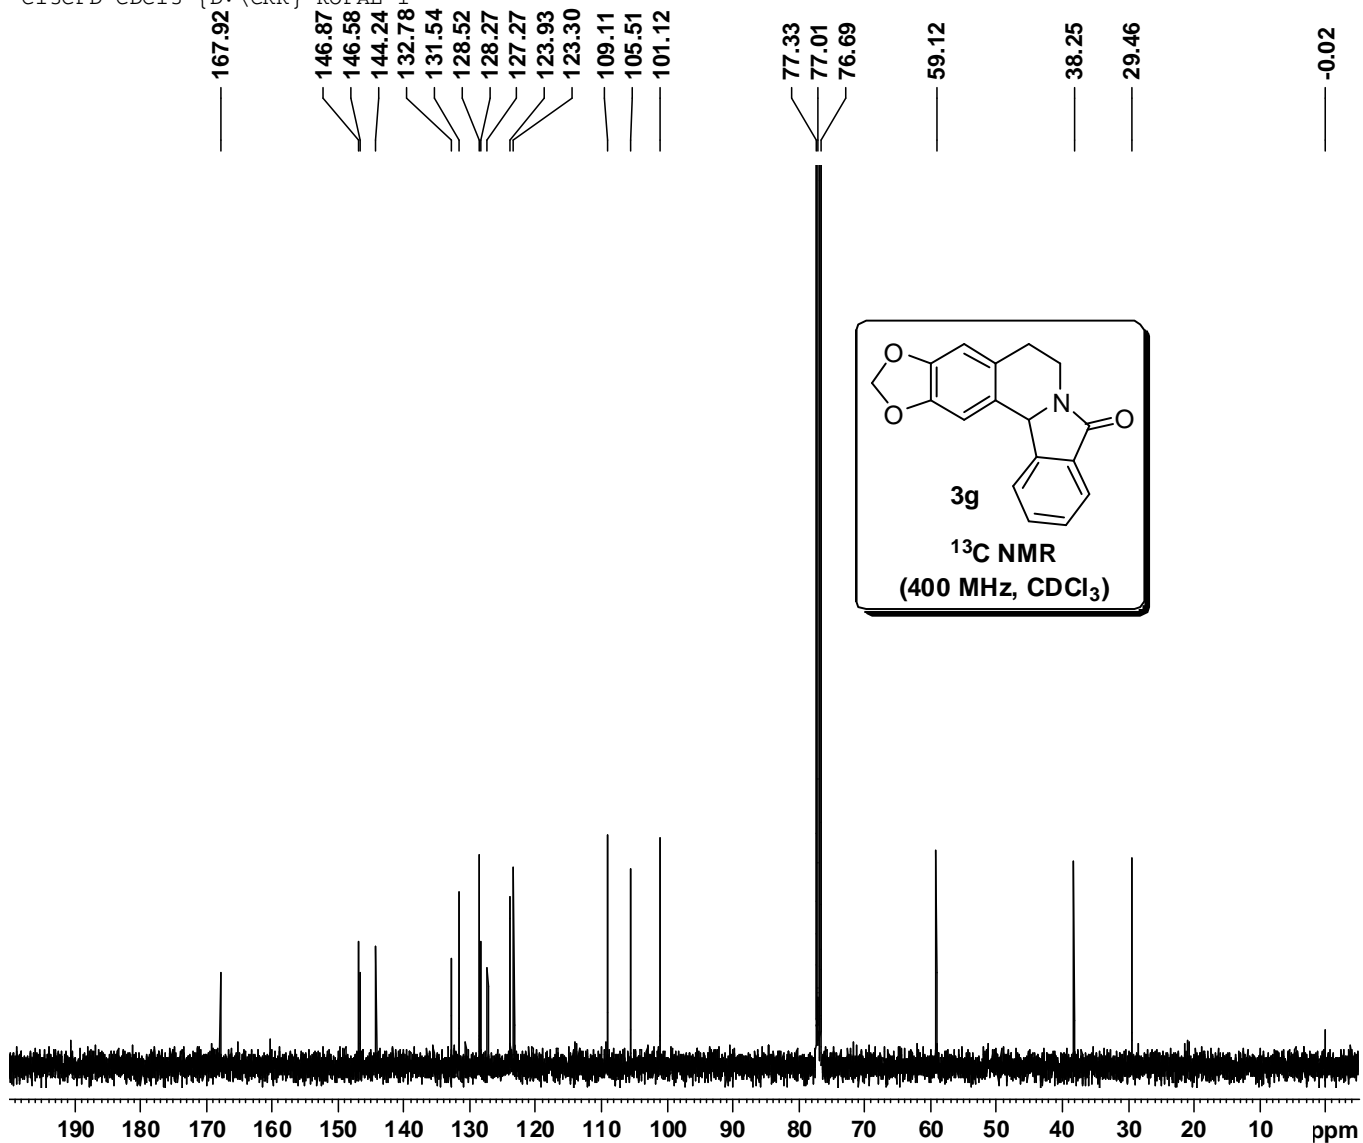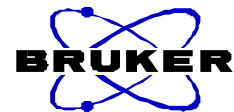

Current Data Parameters  
NAME JS-PIPC-RED  
EXPNO 2  
PROCNO 1

F2 - Acquisition Parameters  
Date\_ 20110208  
Time\_ 14.21  
INSTRUM spect  
PROBHD 5 mm BBO BB-1H  
PULPROG zgpg30  
TD 65536  
SOLVENT CDC13  
NS 512  
DS 4  
SWH 24038.461 Hz  
FIDRES 0.366798 Hz  
AQ 1.3631988 sec  
RG 57  
DW 20.800 usec  
DE 6.00 usec  
TE 297.3 K  
D1 2.0000000 sec  
d11 0.0300000 sec  
DELTA 1.89999998 sec  
TDO 1

=====  
CHANNEL f1  
NUC1 13C  
P1 9.50 usec  
PL1 -0.60 dB  
SFO1 100.6228298 MHz

=====  
CHANNEL f2  
CPDPRG2 waltz16  
NUC2 1H  
PCPD2 90.00 usec  
PL12 15.60 dB  
PL13 15.60 dB  
PL2 -0.90 dB  
SFO2 400.1316005 MHz

F2 - Processing parameters  
SI 32768  
SF 100.6127690 MHz  
WDW EM  
SSB 0  
LB 1.00 Hz  
GB 0  
PC 1.40



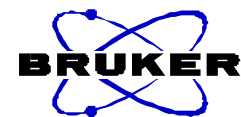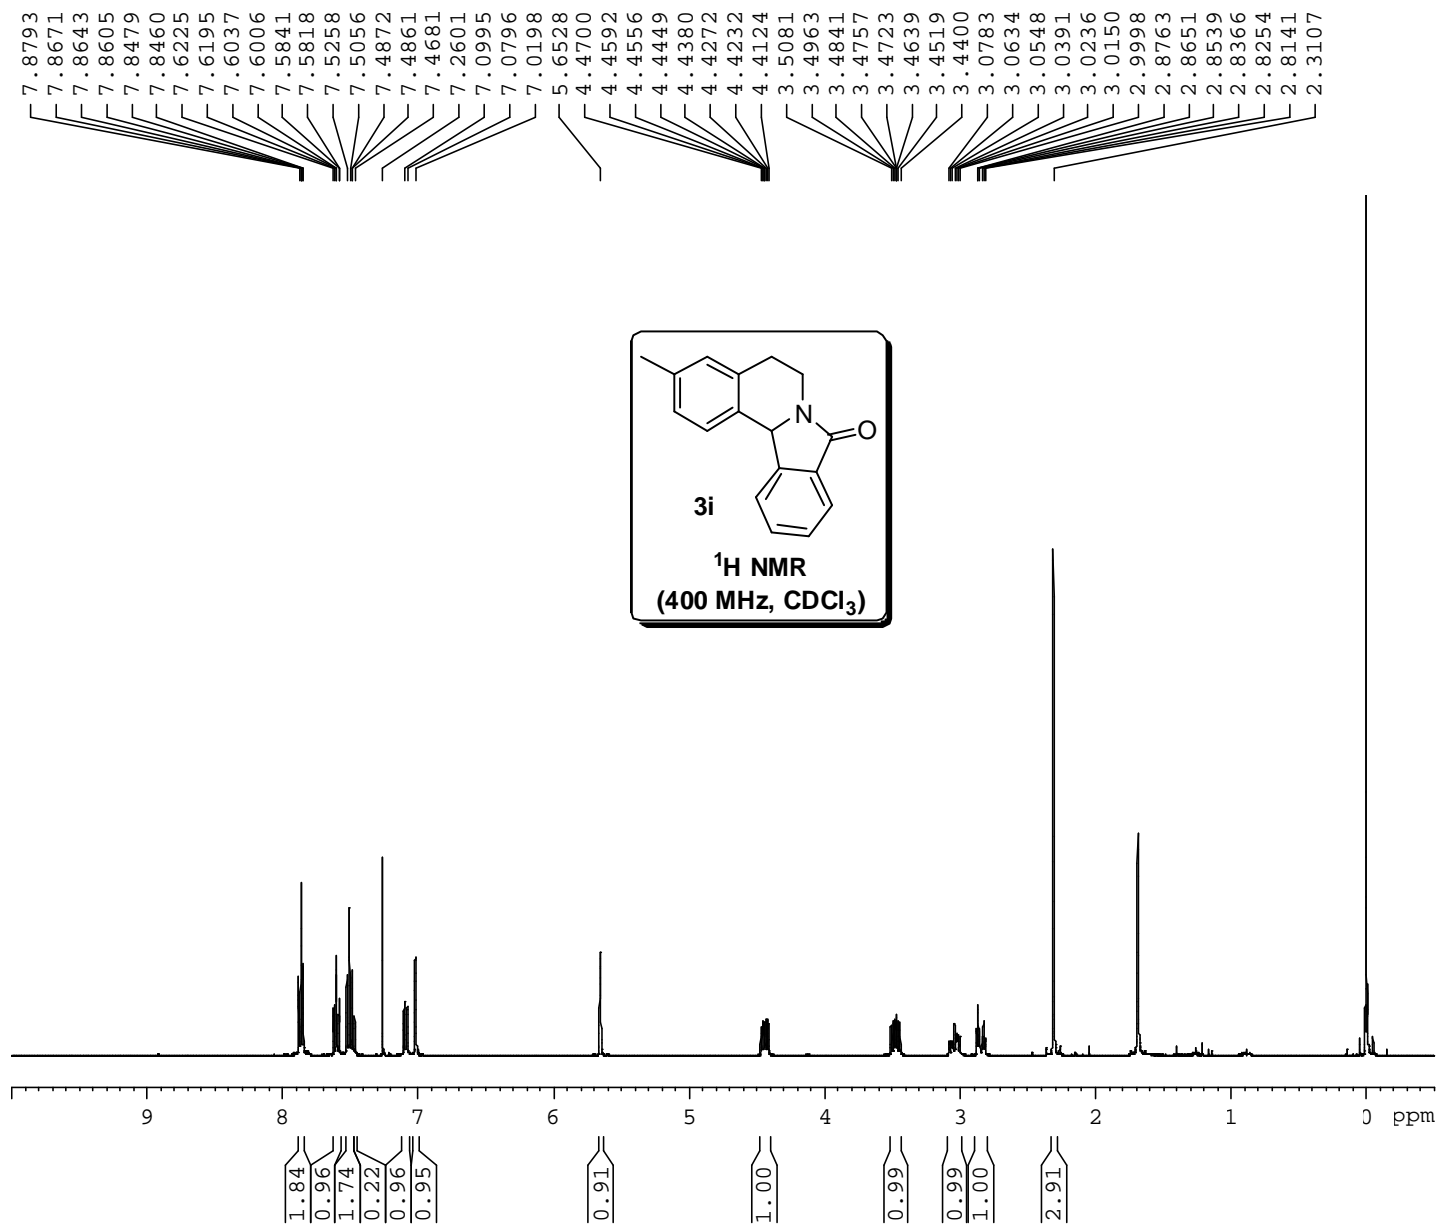

Current Data Parameters  
NAME JS-MERE-1  
EXPNO 1  
PROCNO 1

F2 - Acquisition Parameters  
Date\_ 20110523  
Time 10.51  
INSTRUM spect  
PROBHD 5 mm BBO BB-1H  
PULPROG zg30  
TD 65536  
SOLVENT CDCl3  
NS 16  
DS 2  
SWH 8223.685 Hz  
FIDRES 0.125483 Hz  
AQ 3.9846387 sec  
RG 256  
DW 60.800 usec  
DE 6.00 usec  
TE 295.6 K  
D1 1.00000000 sec  
TD0 1

==== CHANNEL f1 =====  
NUC1 1H  
P1 14.00 usec  
PL1 -0.90 dB  
SFO1 400.1324710 MHz

F2 - Processing parameters  
SI 32768  
SF 400.1300040 MHz  
WDW EM  
SSB 0  
LB 0.30 Hz  
GB 0  
PC 1.00

C13CPD CDC13 {D:\CRR} KOPAL 1

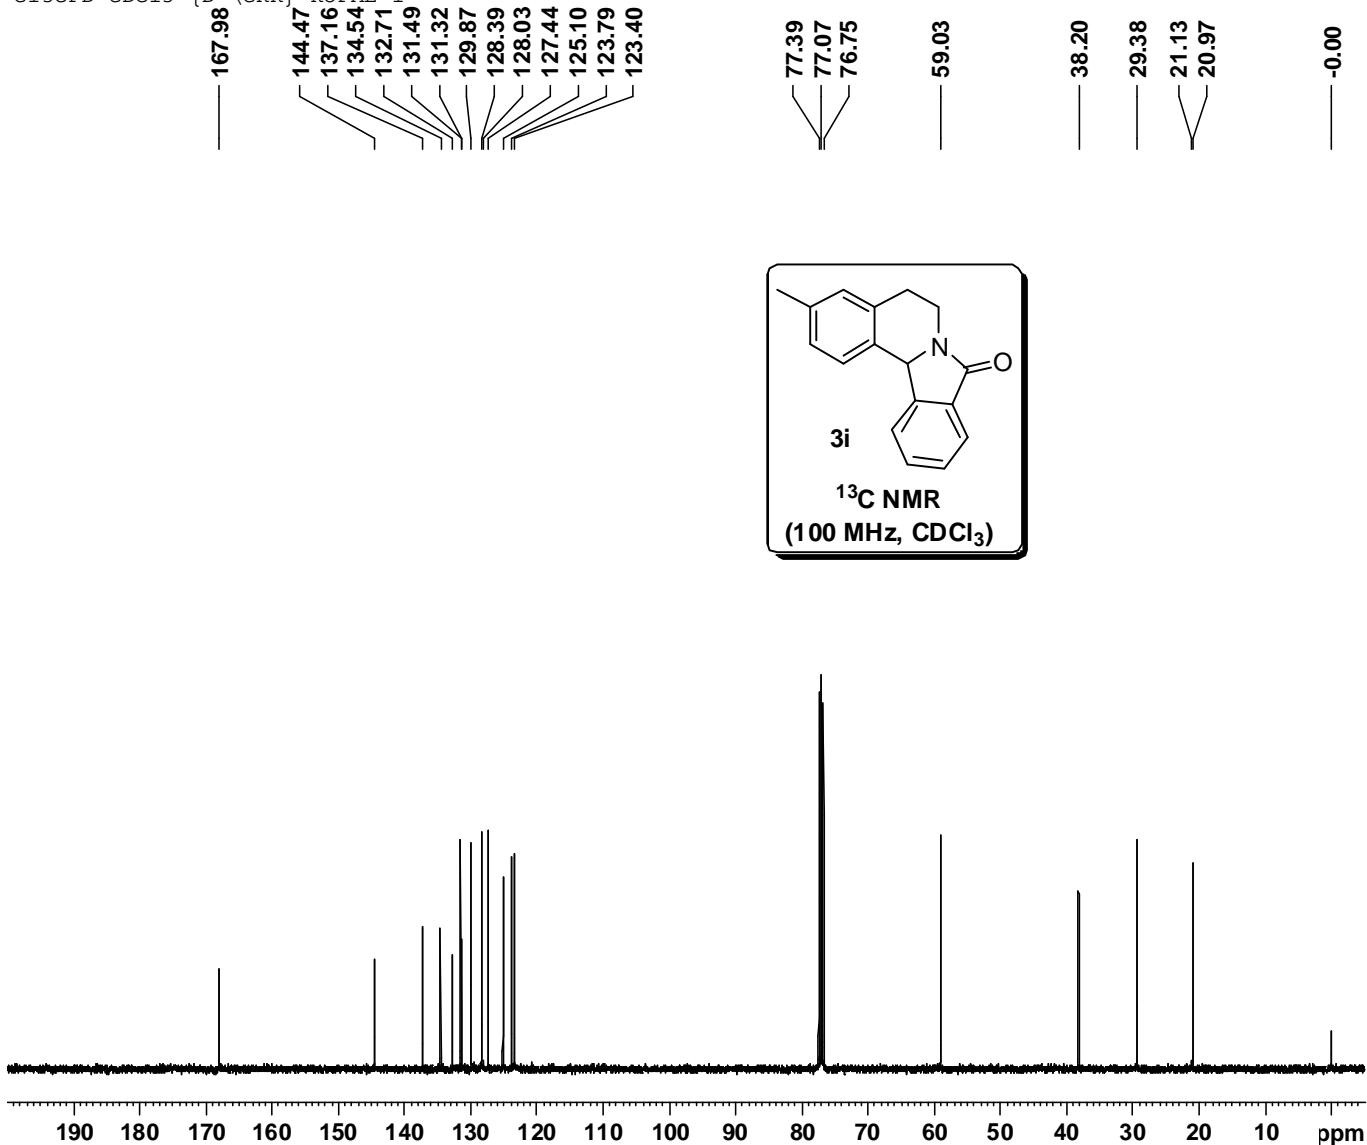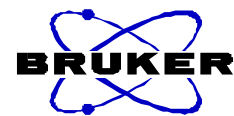

Current Data Parameters  
NAME JS-MERE-1  
EXPNO 2  
PROCNO 1

F2 - Acquisition Parameters  
Date\_ 20110523  
Time\_ 11.51  
INSTRUM spect  
PROBHD 5 mm BBO BB-1H  
PULPROG zgpg30  
TD 65536  
SOLVENT CDC13  
NS 315  
DS 4  
SWH 24038.461 Hz  
FIDRES 0.366798 Hz  
AQ 1.3631988 sec  
RG 1150  
DW 20.800 usec  
DE 6.00 usec  
TE 295.7 K  
D1 2.0000000 sec  
d11 0.0300000 sec  
DELTA 1.89999998 sec  
TD0 1

==== CHANNEL f1 =====  
NUC1 13C  
P1 9.50 usec  
PL1 -0.60 dB  
SFO1 100.6228298 MHz

==== CHANNEL f2 =====  
CPDPRG2 waltz16  
NUC2 1H  
PCPD2 90.00 usec  
PL12 15.60 dB  
PL13 15.60 dB  
PL2 -0.90 dB  
SFO2 400.1316005 MHz

F2 - Processing parameters  
SI 32768  
SF 100.6127708 MHz  
WDW EM  
SSB 0  
LB 1.00 Hz  
GB 0  
PC 1.40

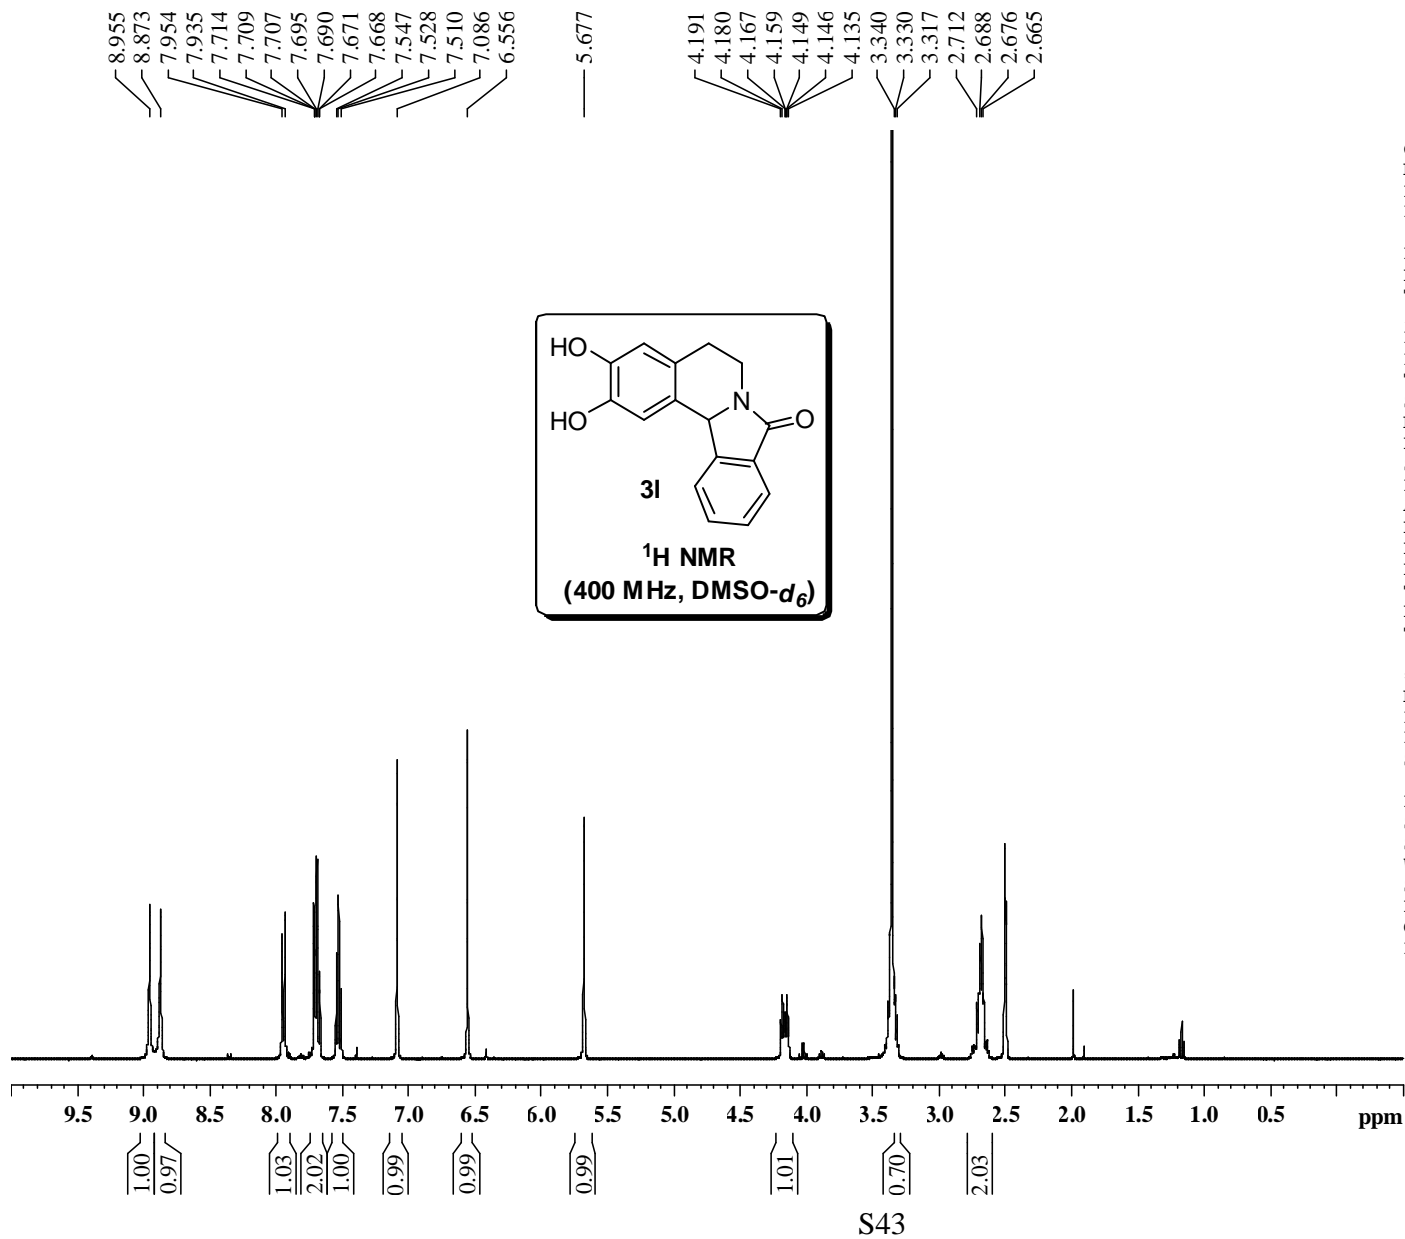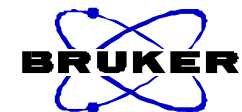

Current Data Parameters  
NAME JS-111-293-1a  
EXPNO 1  
PROCNO 1

F2 - Acquisition Parameters  
Date\_ 20110408  
Time 12.16  
INSTRUM spect  
PROBHD 5 mm BBO BB-1H  
PULPROG zg30  
TD 65536  
SOLVENT DMSO  
NS 16  
DS 2  
SWH 8223.685 Hz  
FIDRES 0.125483 Hz  
AQ 3.9846387 sec  
RG 256  
DW 60.800 usec  
DE 6.00 usec  
TE 294.7 K  
D1 1.00000000 sec  
TD0 1

===== CHANNEL f1 =====  
NUC1 1H  
P1 14.00 usec  
PL1 -0.90 dB  
SFO1 400.1324710 MHz

F2 - Processing parameters  
SI 32768  
SF 400.1299941 MHz  
WDW EM  
SSB 0  
LB 0.30 Hz  
GB 0  
PC 1.00

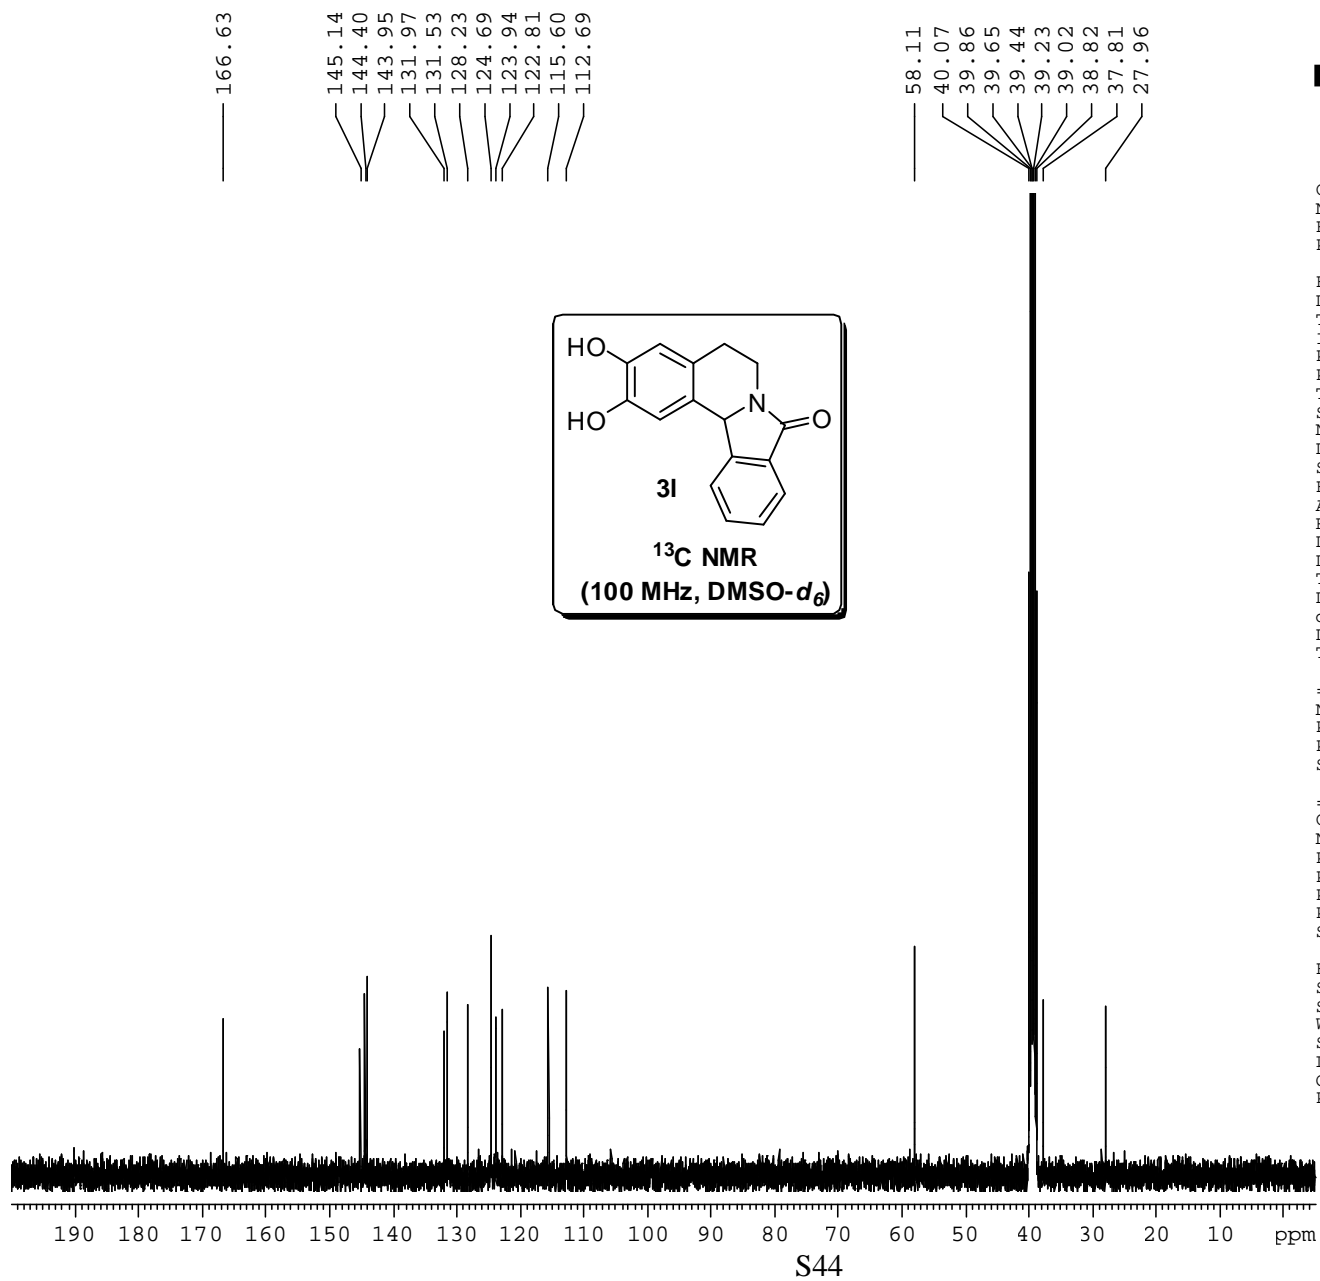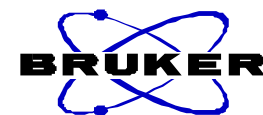

Current Data Parameters  
NAME JS-111-293-1a  
EXPNO 2  
PROCNO 1

F2 - Acquisition Parameters  
Date\_ 20110408  
Time 12.46  
INSTRUM spect  
PROBHD 5 mm BBO BB-1H  
PULPROG zgpg30  
TD 65536  
SOLVENT DMSO  
NS 512  
DS 4  
SWH 24038.461 Hz  
FIDRES 0.366798 Hz  
AQ 1.3631988 sec  
RG 812  
DW 20.800 usec  
DE 6.00 usec  
TE 295.1 K  
D1 2.00000000 sec  
d11 0.03000000 sec  
DELTA 1.89999998 sec  
TD0 1

==== CHANNEL f1 =====  
NUC1 13C  
P1 9.50 usec  
PL1 -0.60 dB  
SFO1 100.6228298 MHz

==== CHANNEL f2 =====  
CPDPRG2 waltz16  
NUC2 1H  
PCPD2 90.00 usec  
PL12 15.60 dB  
PL13 15.60 dB  
PL2 -0.90 dB  
SFO2 400.1316005 MHz

F2 - Processing parameters  
SI 32768  
SF 100.6128193 MHz  
WDW EM  
SSB 0  
LB 1.00 Hz  
GB 0  
PC 1.40

PROTON CDC13 {D:\CRR} KOPAL 1

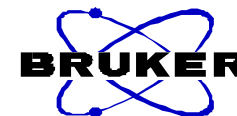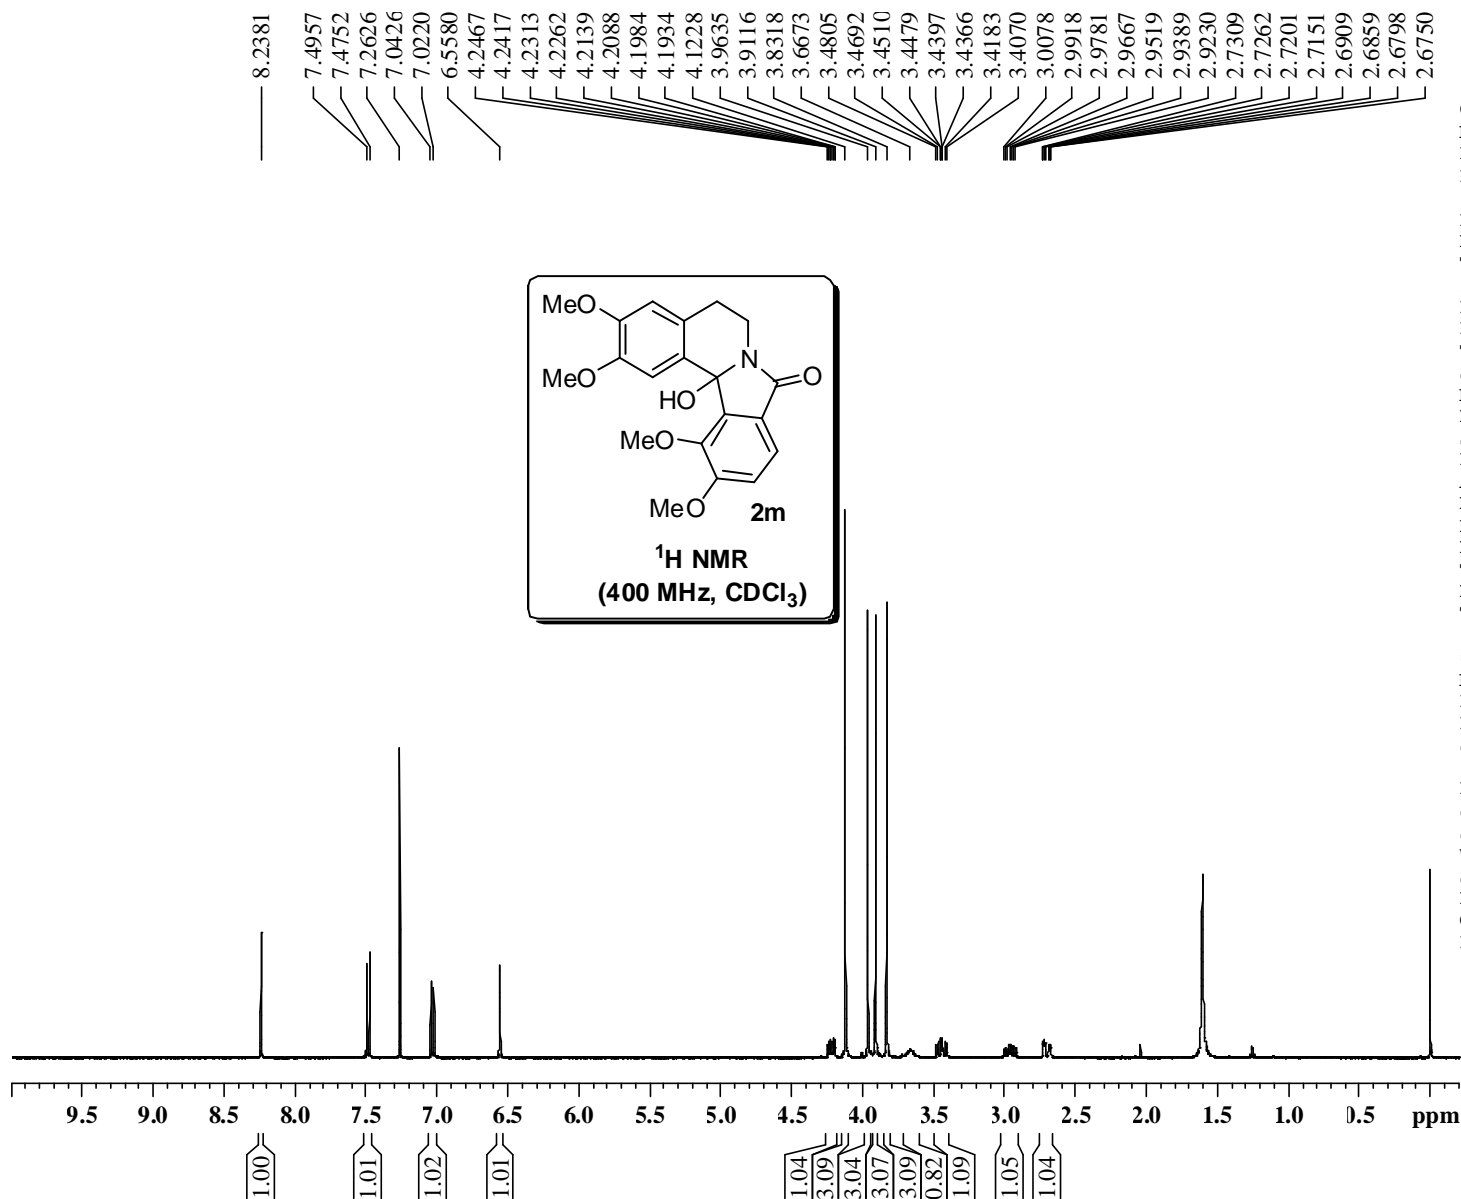

Current Data Parameters

NAME JS-III-Nu-Mod  
EXPNO 1  
PROCNO 1

F2 - Acquisition Parameters

Date\_ 20101028  
Time 10.33  
INSTRUM spect  
PROBHD 5 mm BBO BB-1H  
PULPROG zg30  
TD 65536  
SOLVENT CDCl3  
NS 32  
DS 2  
SWH 8223.685 Hz  
FIDRES 0.125483 Hz  
AQ 3.9846387 sec  
RG 406  
DW 60.800 usec  
DE 6.00 usec  
TE 298.0 K  
D1 1.0000000 sec  
TDO 1

==== CHANNEL f1 =====

NUC1 1H  
P1 14.00 usec  
PL1 -0.90 dB  
SFO1 400.1324710 MHz

F2 - Processing parameters

SI 32768  
SF 400.1300029 MHz  
WDW EM  
SSB 0  
LB 0.30 Hz  
GB 0  
PC 1.00

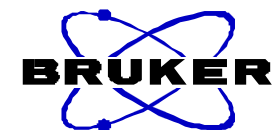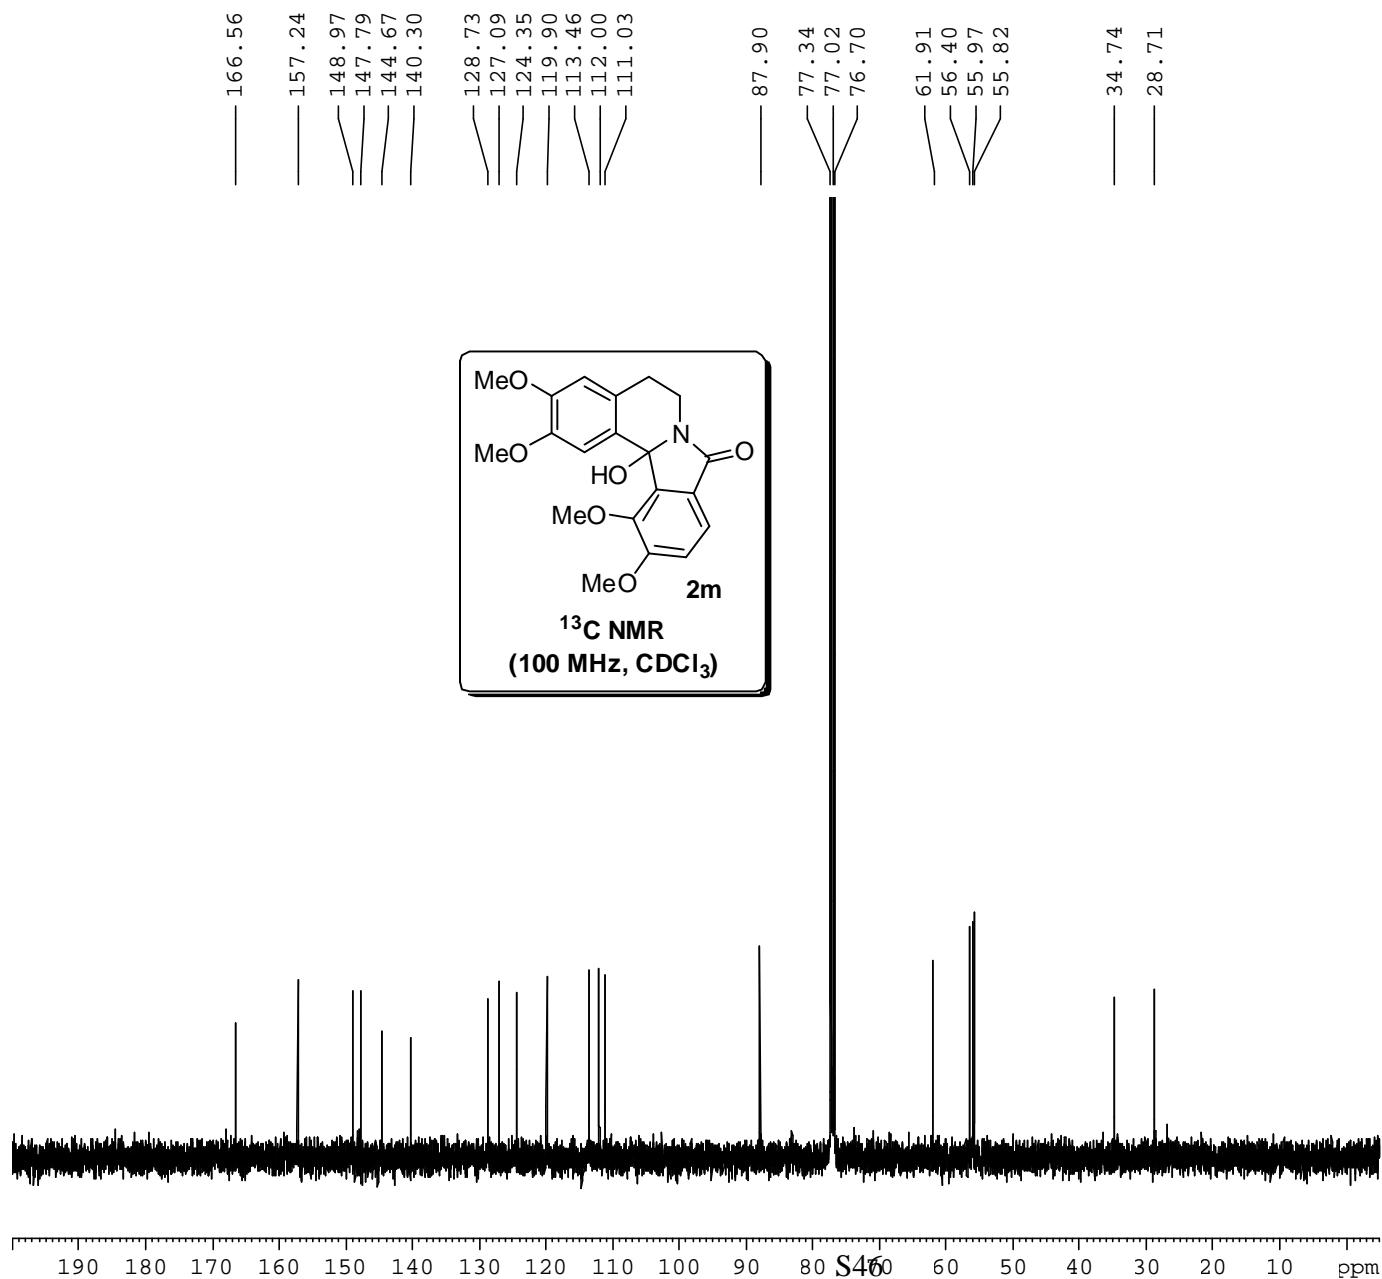

Current Data Parameters  
NAME JS-III-Nu-Mod  
EXPNO 2  
PROCNO 1

F2 - Acquisition Parameters  
Date\_ 20101101  
Time 13.43  
INSTRUM spect  
PROBHD 5 mm BBO BB-1H  
PULPROG zgpg30  
TD 65536  
SOLVENT CDCl3  
NS 512  
DS 4  
SWH 24038.461 Hz  
FIDRES 0.366798 Hz  
AQ 1.3631988 sec  
RG 50.8  
DW 20.800 usec  
DE 6.00 usec  
TE 297.0 K  
D1 2.00000000 sec  
d11 0.03000000 sec  
DELTA 1.89999998 sec  
TD0 1

==== CHANNEL f1 =====  
NUC1 13C  
P1 9.50 usec  
PL1 -0.60 dB  
SFO1 100.6228298 MHz

==== CHANNEL f2 =====  
CPDPRG2 waltz16  
NUC2 1H  
PCPD2 90.00 usec  
PL12 15.60 dB  
PL13 15.60 dB  
PL2 -0.90 dB  
SFO2 400.1316005 MHz

F2 - Processing parameters  
SI 32768  
SF 100.6127690 MHz  
WDW EM  
SSB 0  
LB 1.00 Hz  
GB 0  
PC 1.40

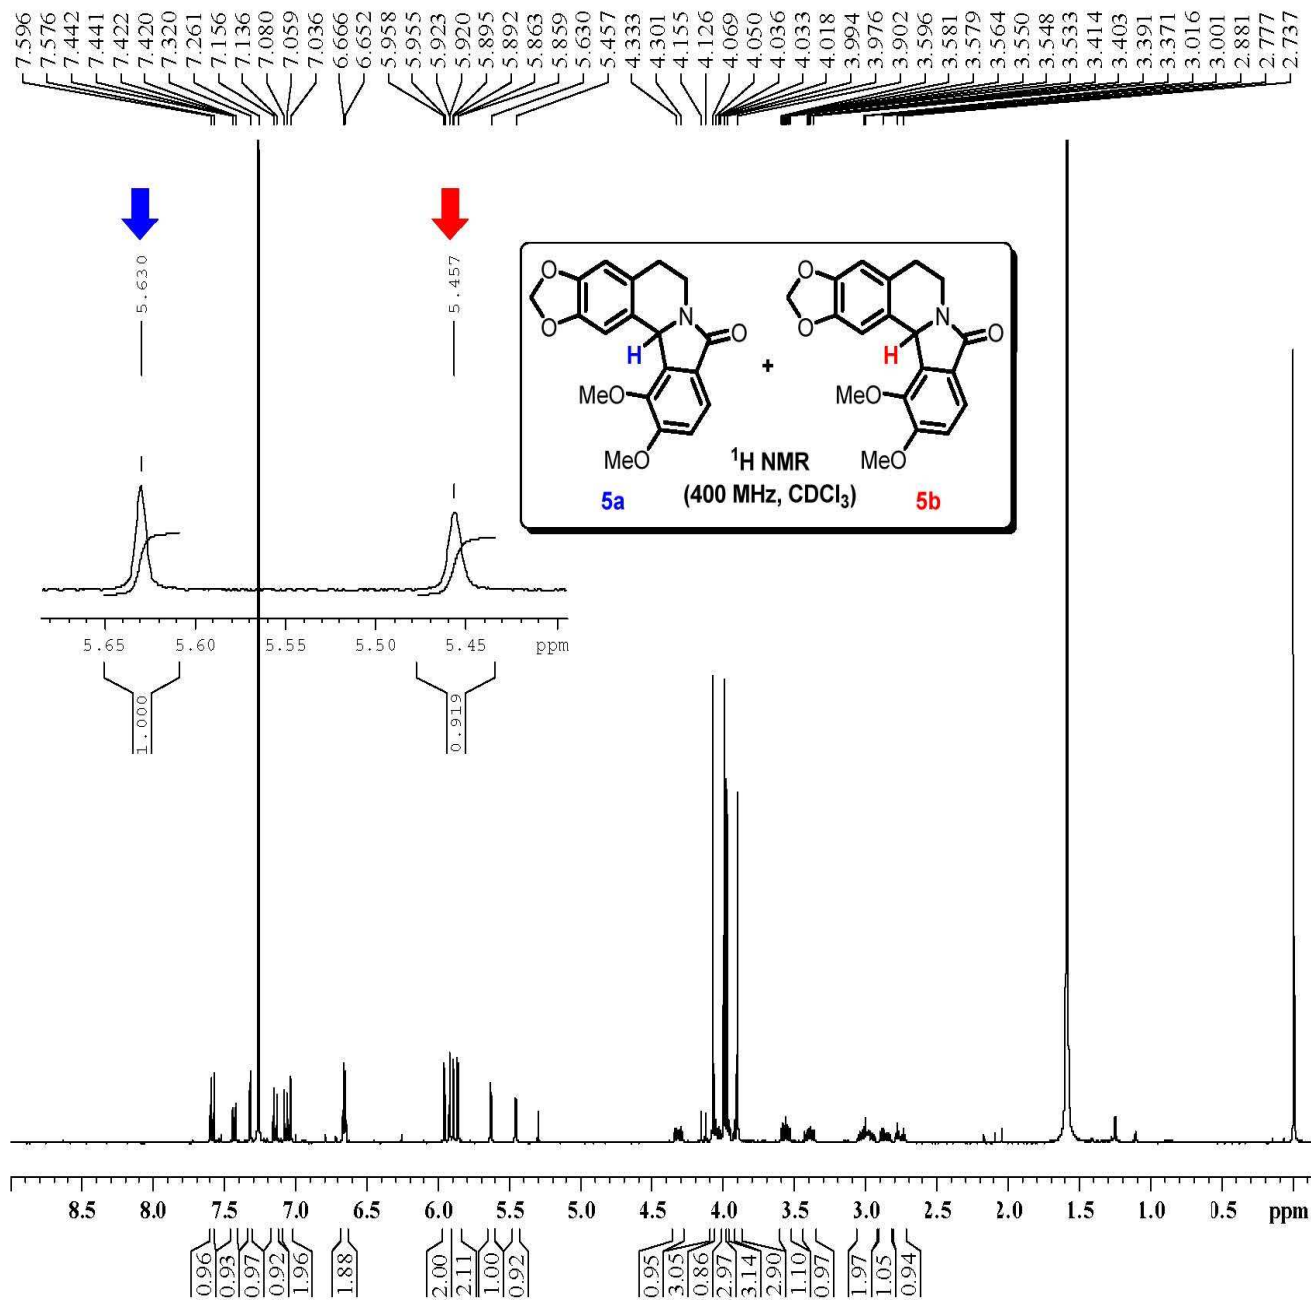

Current Data Parameters  
 NAME JS-III-Nuv  
 EXPNO 1  
 PROCNO 1

F2 - Acquisition Parameters  
 Date\_ 20101026  
 Time 11.49  
 INSTRUM spect  
 PROBHD 5 mm BBO BB-1H  
 PULPROG zg30  
 TD 65536  
 SOLVENT CDCl3  
 NS 16  
 DS 2  
 SWH 8223.685 Hz  
 FIDRES 0.125483 Hz  
 AQ 3.9846387 sec  
 RG 812  
 DW 60.800 usec  
 DE 6.00 usec  
 TE 296.7 K  
 D1 1.0000000 sec  
 TD0 1

===== CHANNEL f1 =====  
 NUC1 1H  
 P1 14.00 usec  
 PL1 -0.90 dB  
 SFO1 400.1324710 MHz

F2 - Processing parameters  
 SI 32768  
 SF 400.1300036 MHz  
 WDW EM  
 SSB 0  
 LB 0.30 Hz  
 GB 0  
 PC 1.00

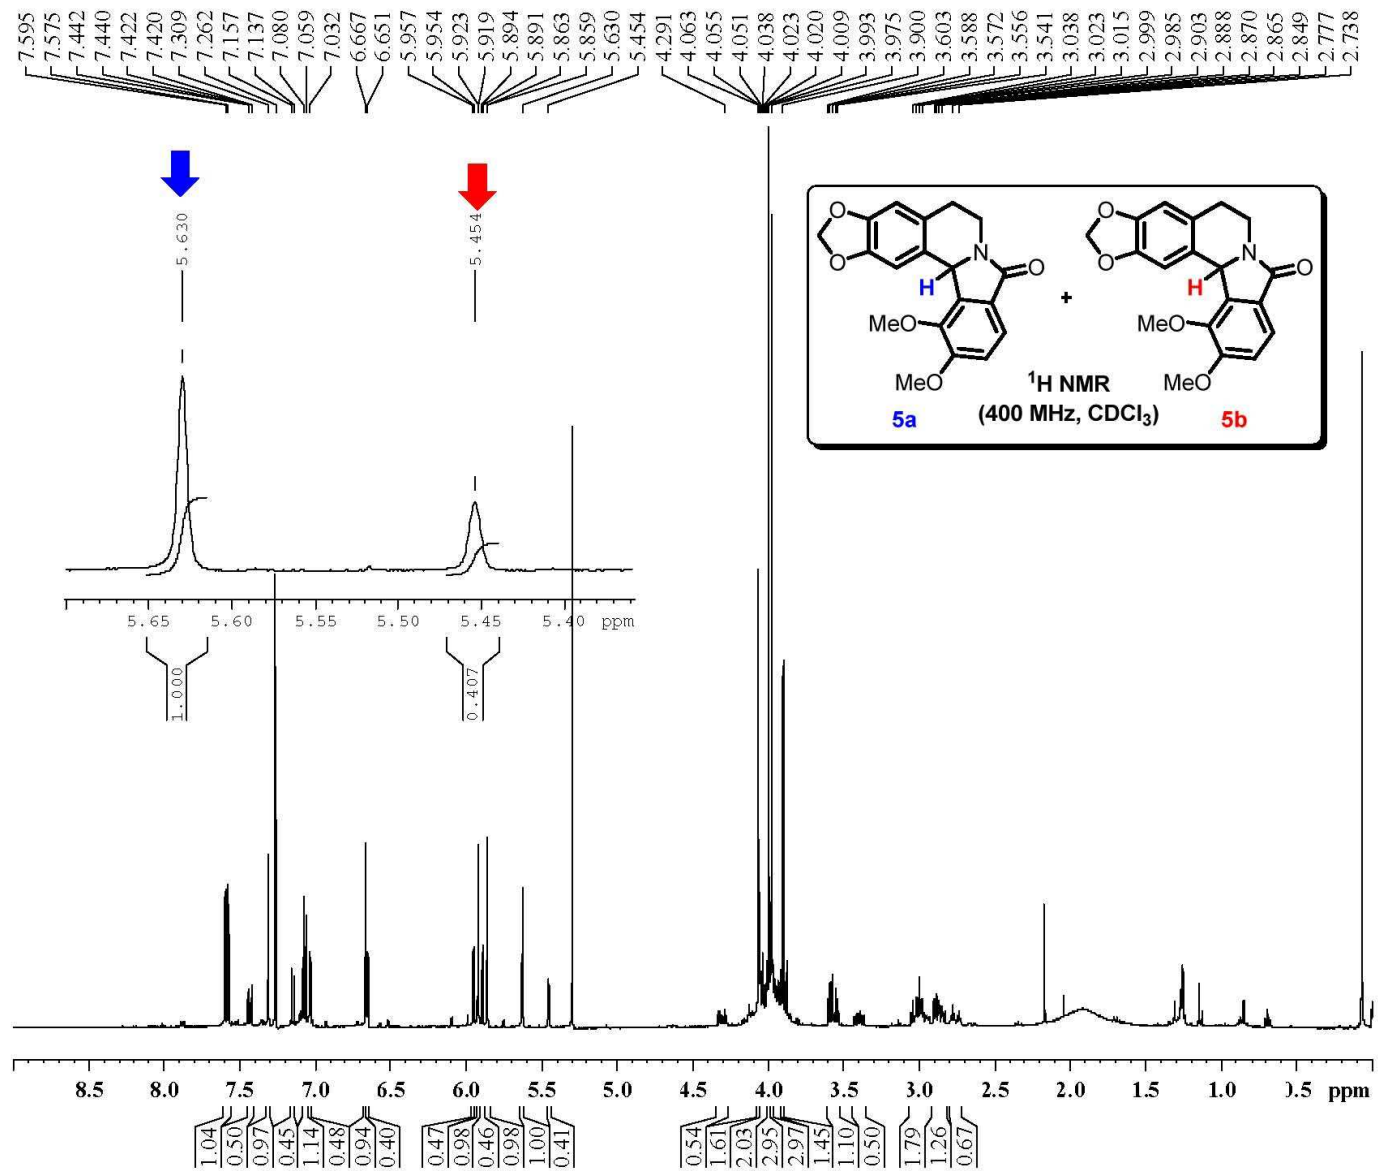



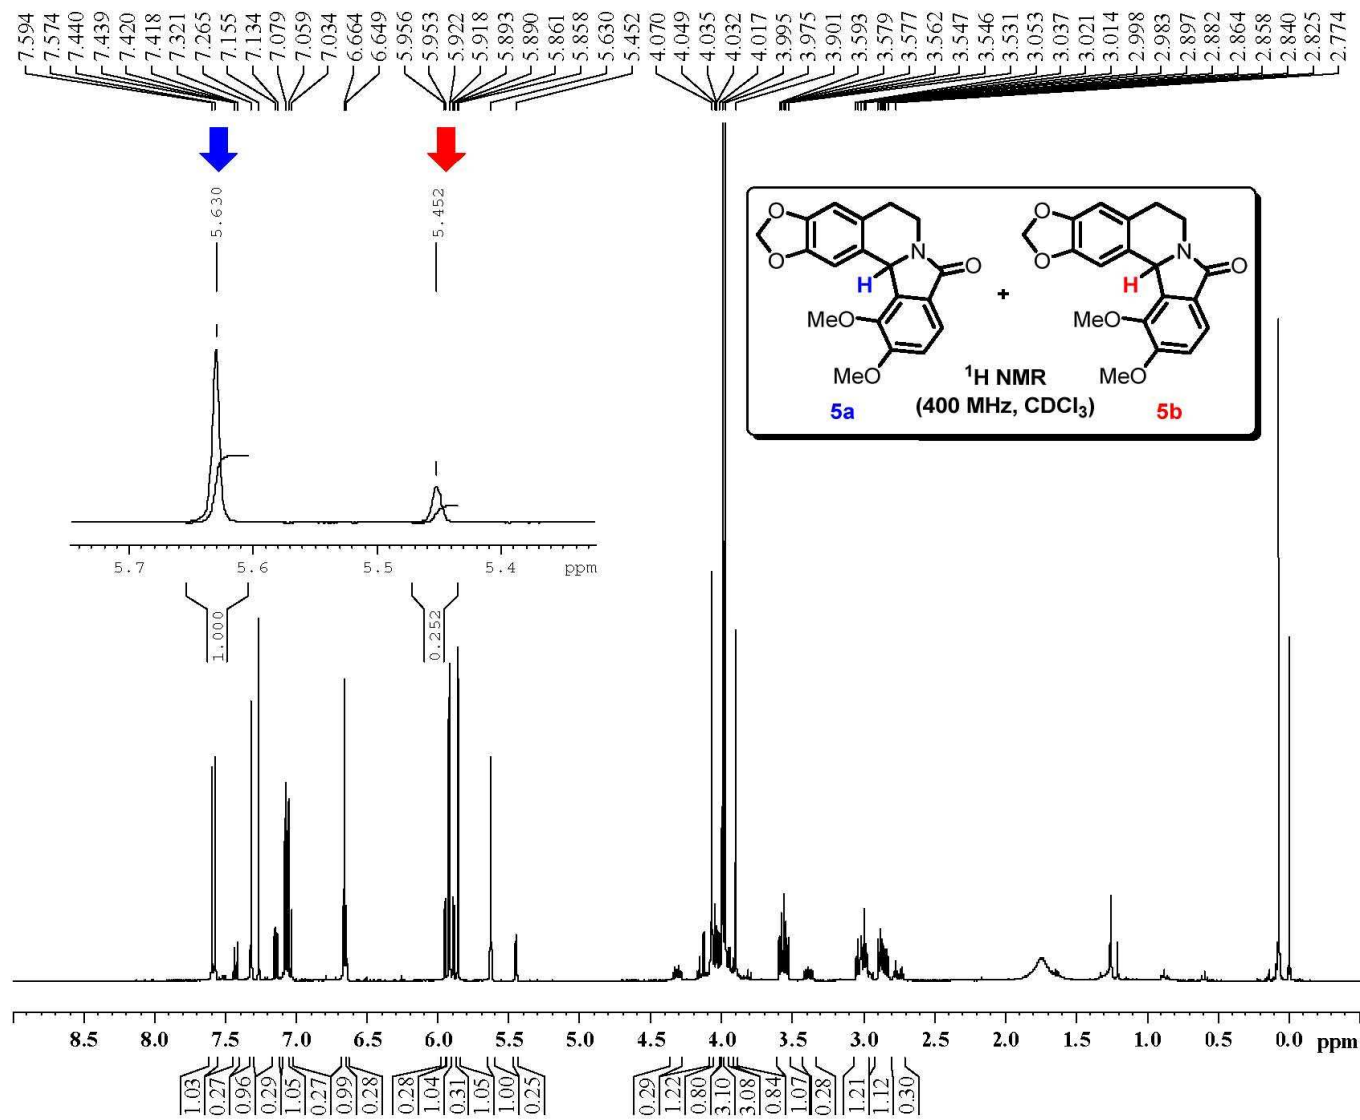

Current Data Parameters  
 NAME JS-NUV-40  
 EXPNO 1  
 PROCNO 1

F2 - Acquisition Parameters  
 Date\_ 20101228  
 Time 12.15  
 INSTRUM spect  
 PROBHD 5 mm BBO BB-1H  
 PULPROG zg30  
 TD 65536  
 SOLVENT CDCl3  
 NS 16  
 DS 2  
 SWH 8223.685 Hz  
 FIDRES 0.125483 Hz  
 AQ 3.9846387 sec  
 RG 256  
 DW 60.800 usec  
 DE 6.00 usec  
 TE 296.5 K  
 D1 1.0000000 sec  
 TD0 1

===== CHANNEL f1 =====  
 NUC1 1H  
 P1 14.00 usec  
 PL1 -0.90 dB  
 SFO1 400.1324710 MHz

F2 - Processing parameters  
 SI 32768  
 SF 400.1300021 MHz  
 WDW EM  
 SSB 0  
 LB 0.30 Hz  
 GB 0  
 PC 1.00

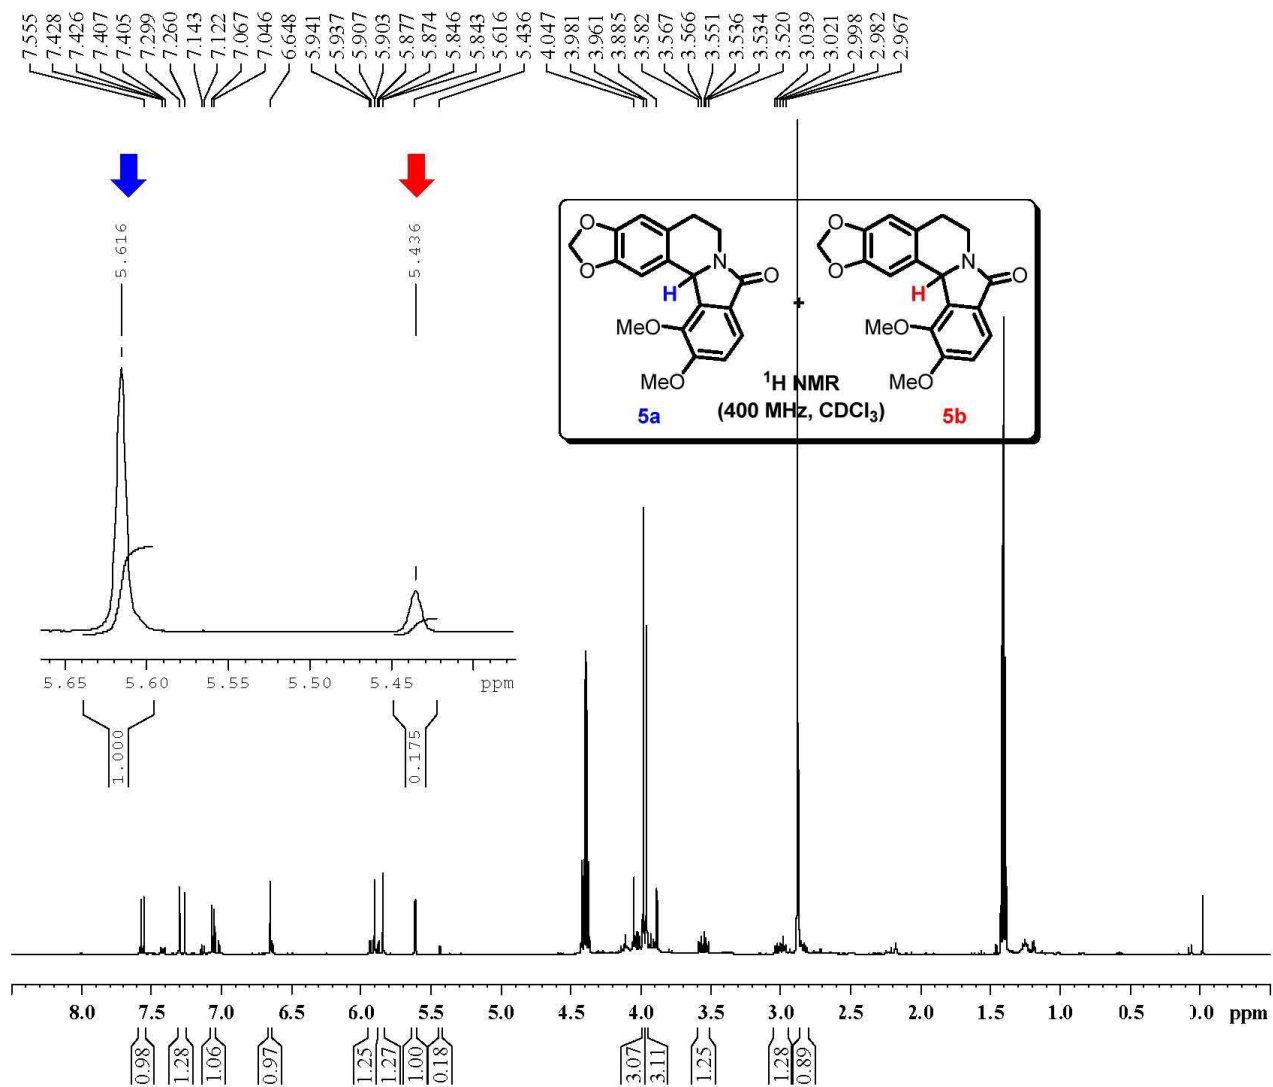

Current Data Parameters  
 NAME JS-III-Nuv-60C  
 EXPNO 1  
 PROCNO 1

F2 - Acquisition Parameters  
 Date\_ 20110112  
 Time 12.02  
 INSTRUM spect  
 PROBHD 5 mm BBO BB-1H  
 PULPROG zg30  
 TD 65536  
 SOLVENT CDCl<sub>3</sub>  
 NS 16  
 DS 2  
 SWH 8223.685 Hz  
 FIDRES 0.125483 Hz  
 AQ 3.9846387 sec  
 RG 161  
 DW 60.800 usec  
 DE 6.00 usec  
 TE 296.4 K  
 D1 1.00000000 sec  
 TD0 1

==== CHANNEL f1 =====  
 NUC1 1H  
 P1 14.00 usec  
 PL1 -0.90 dB  
 SFO1 400.1324710 MHz

F2 - Processing parameters  
 SI 32768  
 SF 400.1300038 MHz  
 WDW EM  
 SSB 0  
 LB 0.30 Hz  
 GB 0  
 PC 1.00

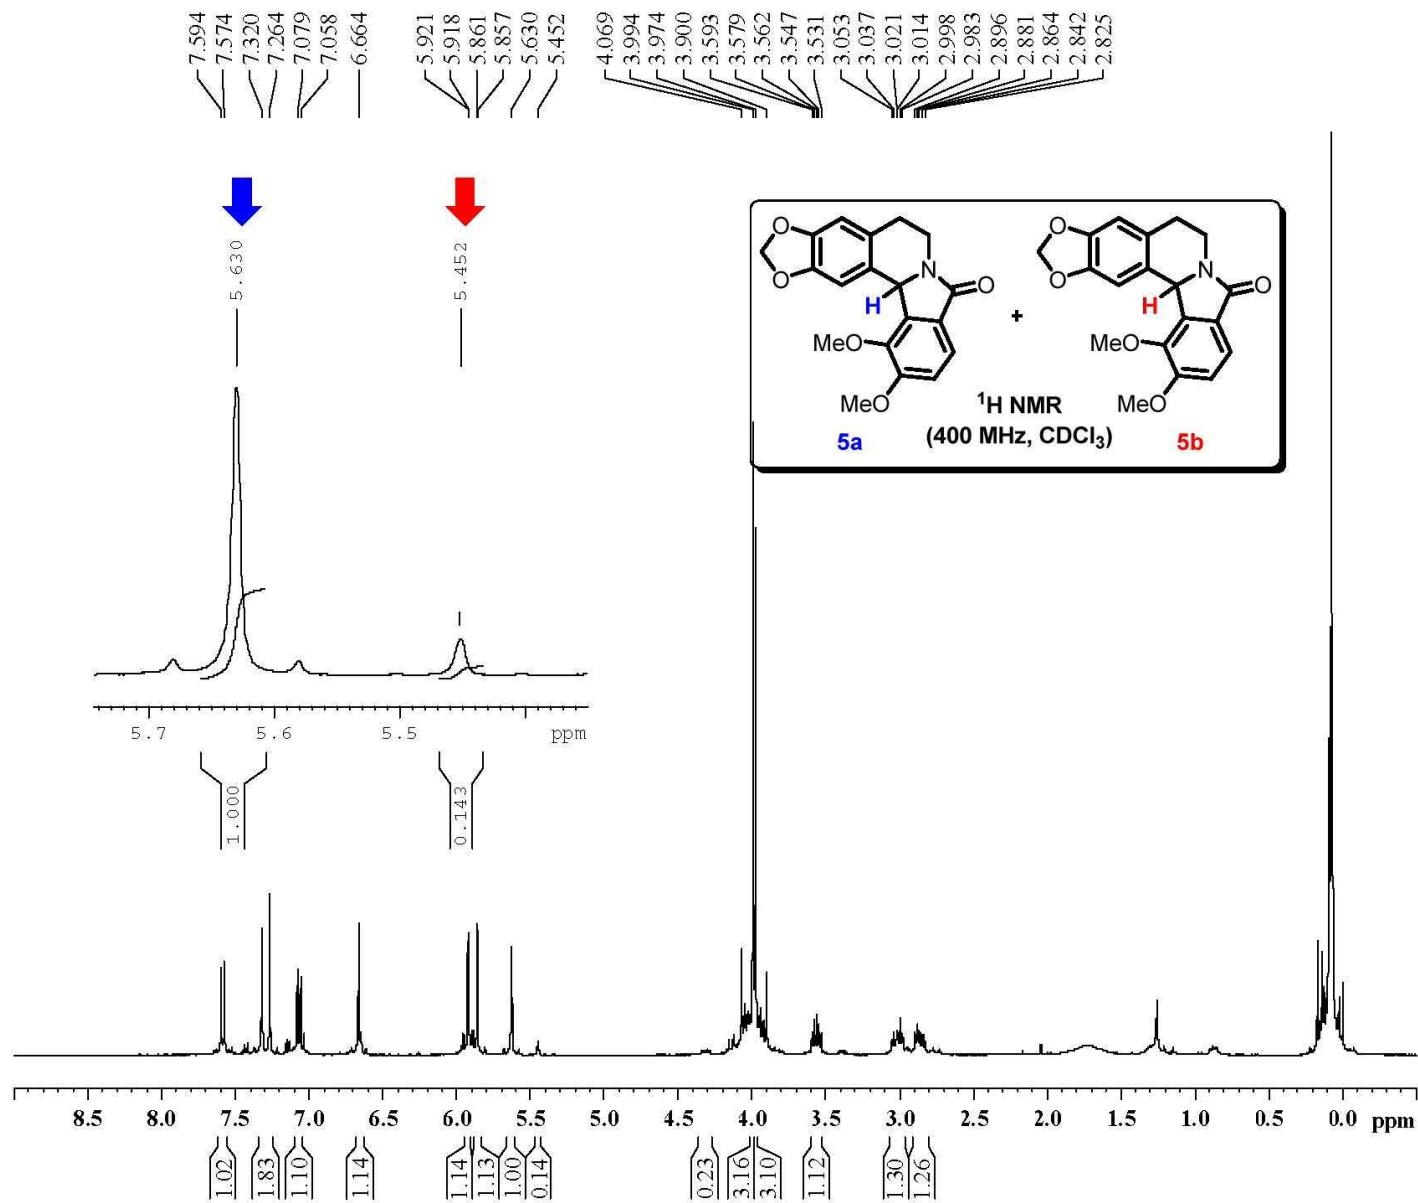

Current Data Parameters

NAME JS-NUV-78  
 EXPNO 1  
 PROCNO 1

F2 - Acquisition Parameters

Date\_ 20101231  
 Time\_ 15.56  
 INSTRUM spect  
 PROBHD 5 mm BBO BB-1H  
 PULPROG zg30  
 TD 65536  
 SOLVENT CDCl<sub>3</sub>  
 NS 16  
 DS 2  
 SWH 8223.685 Hz  
 FIDRES 0.125483 Hz  
 AQ 3.9846387 sec  
 RG 181  
 DW 60.800 usec  
 DE 6.00 usec  
 TE 296.0 K  
 D1 1.00000000 sec  
 TD0 1

==== CHANNEL f1 =====

NUC1 1H  
 P1 14.00 usec  
 PL1 -0.90 dB  
 SFO1 400.1324710 MHz

F2 - Processing parameters

SI 32768  
 SF 400.1300016 MHz  
 WDW EM  
 SSB 0  
 LB 0.30 Hz  
 GB 0  
 PC 1.00

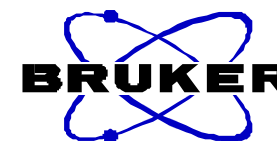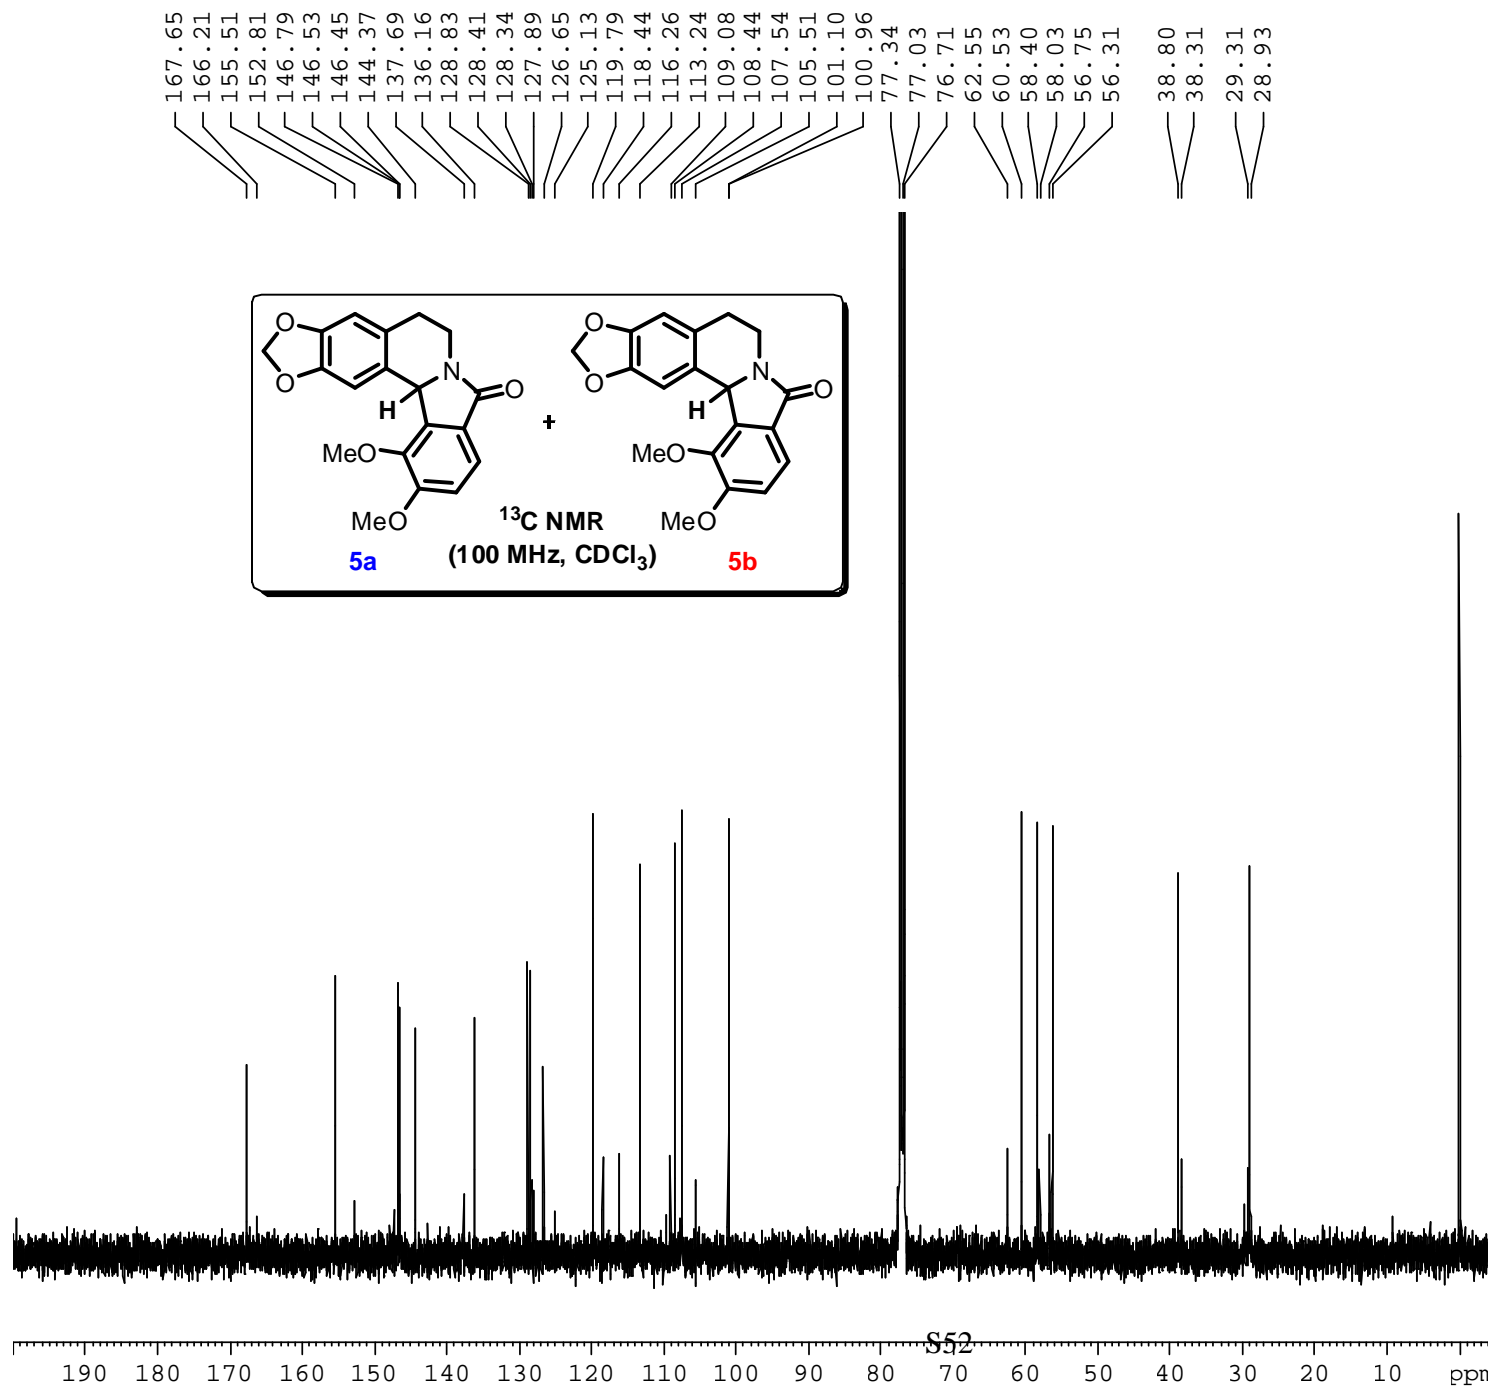

Current Data Parameters  
NAME JS-III-Nuv  
EXPNO 2  
PROCNO 1

F2 - Acquisition Parameters  
Date\_ 20110604  
Time 17.33  
INSTRUM spect  
PROBHD 5 mm BBO BB-1H  
PULPROG zgpg30  
TD 65536  
SOLVENT CDCl3  
NS 5000  
DS 4  
SWH 24038.461 Hz  
FIDRES 0.366798 Hz  
AQ 1.3631988 sec  
RG 50.8  
DW 20.800 usec  
DE 6.00 usec  
TE 296.7 K  
D1 2.0000000 sec  
d11 0.0300000 sec  
DELTA 1.89999998 sec  
TD0 1

==== CHANNEL f1 =====  
NUC1 13C  
P1 9.50 usec  
PL1 -0.60 dB  
SFO1 100.6228298 MHz

==== CHANNEL f2 =====  
CPDPRG2 waltz16  
NUC2 1H  
PCPD2 90.00 usec  
PL12 15.60 dB  
PL13 15.60 dB  
PL2 -0.90 dB  
SFO2 400.1316005 MHz

F2 - Processing parameters  
SI 32768  
SF 100.6127670 MHz  
WDW EM  
SSB 0  
LB 1.00 Hz  
GB 0  
PC 1.40
